# Supplementary material for: Uncertainty in an emissions-constrained world
Source: Springer Nature journal article supplement (doi:10.1007/s10584-014-1103-6), 2014-03-31
Supplement: MOESM2 [file 10584_2014_1103_MOESM2_ESM.xlsx]

## Sheet: CDIAC Global 1959-2010
Global CO2 Emissions from Fossil-Fuel Burning, Cement Manufacture, and Gas Flaring: 1959–2009
WS 1
Created:		M. Jonas								16 June 2009
Modified:		M. Jonas								01 February 2012
Source:		Global, Regional, and National Fossil-Fuel CO2 Emissions								doi: 10.3334/CDIAC/00001_V2011
		Carbon Dioxide Information Analysis Center, Oak Ridge National Laboratory, Oak Ridge, Tennessee 37831–6335, USA								http://cdiac.ornl.gov/trends/emis/overview_2008.html
Authors:		T.A. Boden, G. Marland and R.J. Andres
Remarks:		1. Annual sums were tallied before each element was rounded and reported by the authors so totals may differ slightly from the sum of the elements due to rounding.
		2. For the (preliminary) emission estimates of 2009 and 2010 see also GCP's Global Carbon Budget 2010 (http://www.globalcarbonproject.org/carbonbudget/index.htm). Here, the emissions are taken directly from CDIAC's file "Preliminary_CO2_emissions_2010-1.xls"
		(see http://cdiac.ornl.gov/trends/emis/meth_reg.html).
Year	Total CO2 emissions from fossil-fuels	Carbon emissions from solid fuel consumption	Carbon emissions from liquid fuel consumption	Carbon emissions from gas fuel consumption	Carbon emissions from cement production	Carbon emissions from gas flaring	Per capita carbon emissions		Year	Total fossil fuel CO2 CDIAC global	Total fossil fuel CO2 CDIAC country sum	Total fossil fuel CO2 GCP global
	106 t C	106 t C	106 t C	106 t C	106 t C	106 t C	t C / cap			PgC	PgC	PgC
1959	2454	1382	789	206	40	36	0.83		1959	2.454		2.45
1960	2569	1410	849	227	43	39	0.85		1960	2.569		2.57
1961	2580	1349	904	240	45	42	0.84		1961	2.58		2.58
1962	2686	1351	980	263	49	44	0.86		1962	2.686		2.69
1963	2833	1396	1052	286	51	47	0.88		1963	2.833		2.83
1964	2995	1435	1137	316	57	51	0.92		1964	2.995		3
1965	3130	1460	1219	337	59	55	0.94		1965	3.13		3.13
1966	3288	1478	1323	364	63	60	0.97		1966	3.288		3.29
1967	3393	1448	1423	392	65	66	0.98		1967	3.393		3.39
1968	3566	1448	1551	424	70	73	1.01		1968	3.566		3.57
1969	3780	1486	1673	467	74	80	1.05		1969	3.78		3.78
1970	4053	1556	1839	493	78	87	1.1		1970	4.053		4.05
1971	4208	1559	1947	530	84	88	1.12		1971	4.208		4.21
1972	4376	1576	2057	560	89	94	1.14		1972	4.376		4.38
1973	4615	1581	2241	588	95	110	1.18		1973	4.615		4.61
1974	4623	1579	2245	597	96	107	1.16		1974	4.623		4.62
1975	4596	1673	2132	604	95	92	1.13		1975	4.596		4.6
1976	4864	1710	2314	630	103	108	1.18		1976	4.864		4.86
1977	5026	1766	2398	650	108	104	1.19		1977	5.026		5.03
1978	5087	1793	2392	680	116	106	1.19		1978	5.087		5.09
1979	5369	1887	2544	721	119	98	1.23		1979	5.369		5.37
1980	5316	1947	2422	740	120	86	1.2		1980	5.316		5.32
1981	5152	1921	2289	756	121	64	1.14		1981	5.152		5.15
1982	5113	1992	2196	740	121	64	1.11		1982	5.113		5.11
1983	5095	1995	2176	741	125	58	1.09		1983	5.095		5.1
1984	5283	2094	2202	808	128	51	1.11		1984	5.283		5.28
1985	5441	2237	2188	837	131	49	1.12		1985	5.441		5.44
1986	5609	2300	2295	831	137	46	1.14		1986	5.609		5.61
1987	5755	2364	2309	894	143	44	1.15		1987	5.755		5.75
1988	5968	2414	2414	937	152	50	1.17		1988	5.968		5.97
1989	6088	2457	2462	973	156	41	1.17		1989	6.088		6.09
1990	6151	2419	2515	1020	157	40	1.16		1990	6.151	5.95474	6.15
1991	6239	2348	2624	1062	161	44	1.16		1991	6.239	6.13174	6.24
1992	6178	2372	2511	1094	167	35	1.13		1992	6.178	6.04294	6.18
1993	6172	2301	2541	1119	176	36	1.11		1993	6.172	6.1214	6.17
1994	6284	2361	2566	1133	186	38	1.12		1994	6.284	6.14286	6.28
1995	6422	2446	2588	1154	197	38	1.12		1995	6.422	6.25423	6.42
1996	6550	2473	2627	1208	203	39	1.13		1996	6.55	6.41908	6.55
1997	6663	2500	2703	1210	209	41	1.13		1997	6.663	6.44361	6.66
1998	6638	2395	2755	1243	209	37	1.11		1998	6.638	6.32515	6.64
1999	6584	2356	2703	1270	217	37	1.09		1999	6.584	6.34768	6.58
2000	6750	2370	2818	1288	226	48	1.1		2000	6.75	6.50107	6.75
2001	6916	2494	2827	1311	237	46	1.12		2001	6.916	6.54048	6.91
2002	6981	2525	2810	1346	252	48	1.11		2002	6.981	6.65206	6.98
2003	7397	2747	2935	1391	276	47	1.16		2003	7.397	7.04336	7.4
2004	7782	2971	3027	1431	298	55	1.21		2004	7.782	7.39714	7.78
2005	8086	3162	3071	1473	320	61	1.24		2005	8.086	7.60713	8.09
2006	8350	3333	3080	1519	355	62	1.27		2006	8.35	7.84375	8.35
2007	8543	3468	3074	1551	382	68	1.28		2007	8.543	8.08279	8.54
2008	8748	3578	3095	1616	386	73	1.3		2008	8.748	8.2222	8.75
2009	8626.35	3539.32	3026.97	1575.33	411.733	73			2009	8.62635		8.63
2010	9138.79	3807.22	3119.47	1692.16	446.947	73					CDIAC country sum
											1990–1999
											(in Pg C and Pg CO2)
											62.1834
											228.006

## Sheet: CDIAC Nations 1751-2008
National CO2 Emissions from Fossil-Fuel Burning, Cement Manufacture, and Gas Flaring: 1751–2007
WS 2
Created:		M. Jonas								15 June 2009
Modified:		M. Jonas								01 February 2012
Source:		Global, Regional, and National Fossil-Fuel CO2 Emissions								doi: 10.3334/CDIAC/00001_V2011
		Carbon Dioxide Information Analysis Center, Oak Ridge National Laboratory, Oak Ridge, Tennessee 37831–6335, USA								http://cdiac.ornl.gov/trends/emis/overview_2008.html
Authors:		T.A. Boden, G. Marland and R.J. Andres
Remarks:		1. Annual sums were tallied before each element was rounded and reported by the authors so totals may differ slightly from the sum of the elements due to rounding.
Nation	Year	Total CO2 emissions from fossil-fuels	Emissions from solid fuel consumption	Emissions from liquid fuel consumption	Emissions from gas fuel consumption	Emissions from cement production	Emissions from gas flaring	Per capita carbon emissions	Emissions from bunker fuels
		103 t C	103 t C	103 t C	103 t C	103 t C	103 t C	t C / cap	103 t C
AFGHANISTAN	1949	4	4	0	0	0	.	.	0
AFGHANISTAN	1950	23	6	18	0	0	0	0	0
AFGHANISTAN	1951	25	7	18	0	0	0	0	0
AFGHANISTAN	1952	25	9	17	0	0	0	0	0
AFGHANISTAN	1953	29	10	18	0	0	0	0	0
AFGHANISTAN	1954	29	12	18	0	0	0	0	0
AFGHANISTAN	1955	42	17	25	0	0	0	0	0
AFGHANISTAN	1956	50	17	33	0	0	0	0.01	0
AFGHANISTAN	1957	80	21	59	0	0	0	0.01	0
AFGHANISTAN	1958	90	25	65	0	0	0	0.01	0
AFGHANISTAN	1959	105	30	70	0	5	0	0.01	0
AFGHANISTAN	1960	113	35	74	0	5	0	0.01	0
AFGHANISTAN	1961	134	48	80	0	6	0	0.01	0
AFGHANISTAN	1962	188	81	99	0	8	0	0.02	0
AFGHANISTAN	1963	193	72	107	0	14	0	0.02	0
AFGHANISTAN	1964	229	82	130	0	17	0	0.02	0
AFGHANISTAN	1965	275	104	148	0	23	0	0.03	0
AFGHANISTAN	1966	298	117	157	0	24	0	0.03	0
AFGHANISTAN	1967	350	109	152	71	18	0	0.03	0
AFGHANISTAN	1968	334	91	136	95	13	0	0.03	0
AFGHANISTAN	1969	257	99	144	0	14	0	0.02	0
AFGHANISTAN	1970	456	119	183	59	13	81	0.04	3
AFGHANISTAN	1971	517	98	204	120	12	83	0.04	3
AFGHANISTAN	1972	418	52	171	82	13	100	0.03	2
AFGHANISTAN	1973	447	85	192	91	19	61	0.04	3
AFGHANISTAN	1974	523	83	210	109	20	100	0.04	3
AFGHANISTAN	1975	580	109	239	130	20	83	0.04	6
AFGHANISTAN	1976	542	116	241	82	23	80	0.04	4
AFGHANISTAN	1977	652	123	266	140	19	104	0.05	2
AFGHANISTAN	1978	589	157	255	82	17	77	0.04	6
AFGHANISTAN	1979	611	96	318	105	19	73	0.04	6
AFGHANISTAN	1980	480	86	252	51	7	83	0.03	13
AFGHANISTAN	1981	541	91	277	83	10	80	0.04	7
AFGHANISTAN	1982	573	105	271	108	12	77	0.04	9
AFGHANISTAN	1983	688	105	333	168	2	80	0.05	10
AFGHANISTAN	1984	772	107	309	254	15	86	0.06	13
AFGHANISTAN	1985	957	109	422	325	10	90	0.08	11
AFGHANISTAN	1986	857	116	311	328	12	90	0.07	9
AFGHANISTAN	1987	852	121	550	107	14	61	0.07	7
AFGHANISTAN	1988	782	100	497	120	14	51	0.07	7
AFGHANISTAN	1989	757	92	509	131	14	11	0.06	7
AFGHANISTAN	1990	730	76	522	110	15	7	0.06	5
AFGHANISTAN	1991	680	68	484	106	15	7	0.05	5
AFGHANISTAN	1992	389	6	262	99	16	6	0.03	5
AFGHANISTAN	1993	375	5	252	96	16	6	0.02	5
AFGHANISTAN	1994	360	4	242	92	16	6	0.02	4
AFGHANISTAN	1995	346	4	232	88	16	6	0.02	4
AFGHANISTAN	1996	327	2	219	84	16	6	0.02	4
AFGHANISTAN	1997	304	1	203	77	16	6	0.02	4
AFGHANISTAN	1998	288	1	193	72	16	6	0.01	4
AFGHANISTAN	1999	227	1	137	66	16	6	0.01	4
AFGHANISTAN	2000	213	1	138	61	7	6	0.01	4
AFGHANISTAN	2001	176	19	87	57	7	6	0.01	4
AFGHANISTAN	2002	98	15	71	4	8	0	0	4
AFGHANISTAN	2003	159	25	121	3	10	0	0.01	7
AFGHANISTAN	2004	192	25	156	2	10	0	0.01	0
AFGHANISTAN	2005	191	24	158	1	8	0	0.01	9
AFGHANISTAN	2006	190	24	158	1	7	0	0.01	9
AFGHANISTAN	2007	195	24	162	1	7	0	0.01	9
AFGHANISTAN	2008	222	24	190	1	7	0	0.01	9
ALBANIA	1933	2	0	2	0	0	.	.	0
ALBANIA	1934	2	0	2	0	0	.	.	0
ALBANIA	1935	5	0	5	0	0	.	.	0
ALBANIA	1936	35	0	34	0	1	.	.	0
ALBANIA	1937	81	0	79	0	2	.	.	0
ALBANIA	1938	95	0	95	0	0	.	.	0
ALBANIA	1939	118	0	118	0	0	.	.	0
ALBANIA	1940	189	0	189	0	0	.	.	0
ALBANIA	1941	171	0	169	0	2	.	.	0
ALBANIA	1942	203	0	203	0	0	.	.	0
ALBANIA	1943	126	0	126	0	0	.	.	0
ALBANIA	1944	42	0	42	0	0	.	.	0
ALBANIA	1945	33	0	33	0	0	.	.	0
ALBANIA	1946	132	6	126	0	0	.	.	0
ALBANIA	1947	253	0	253	0	0	.	.	0
ALBANIA	1948	192	2	190	0	0	.	.	0
ALBANIA	1949	277	0	277	0	0	.	.	0
ALBANIA	1950	81	12	68	0	2	0	0.07	0
ALBANIA	1951	110	20	85	3	2	0	0.09	0
ALBANIA	1952	102	21	77	3	2	0	0.08	0
ALBANIA	1953	113	31	75	5	2	0	0.09	0
ALBANIA	1954	137	43	84	8	2	0	0.1	0
ALBANIA	1955	181	60	105	10	6	0	0.13	0
ALBANIA	1956	229	68	139	13	9	0	0.16	0
ALBANIA	1957	411	75	310	16	10	0	0.28	0
ALBANIA	1958	328	79	220	18	11	0	0.22	0
ALBANIA	1959	394	92	271	21	10	0	0.25	0
ALBANIA	1960	552	89	430	23	10	0	0.34	0
ALBANIA	1961	622	88	496	23	16	0	0.37	0
ALBANIA	1962	672	99	534	23	16	0	0.39	0
ALBANIA	1963	568	77	450	23	18	0	0.32	0
ALBANIA	1964	550	91	419	23	17	0	0.3	0
ALBANIA	1965	593	108	443	23	20	0	0.32	0
ALBANIA	1966	696	130	518	28	19	0	0.36	0
ALBANIA	1967	731	143	523	35	30	0	0.37	0
ALBANIA	1968	838	161	596	40	41	0	0.41	0
ALBANIA	1969	885	188	606	46	45	0	0.43	0
ALBANIA	1970	1021	243	677	51	49	0	0.48	0
ALBANIA	1971	1187	270	802	66	49	0	0.54	0
ALBANIA	1972	1539	295	1114	76	54	0	0.69	0
ALBANIA	1973	1443	319	954	100	70	0	0.63	0
ALBANIA	1974	1185	330	661	117	76	0	0.5	0
ALBANIA	1975	1253	344	670	151	88	0	0.52	0
ALBANIA	1976	1350	347	724	183	95	0	0.55	0
ALBANIA	1977	1560	464	804	191	102	0	0.62	0
ALBANIA	1978	1771	580	896	185	109	0	0.69	0
ALBANIA	1979	2069	732	1030	193	115	0	0.79	0
ALBANIA	1980	1410	634	429	211	136	0	0.53	0
ALBANIA	1981	2002	722	954	220	107	0	0.73	0
ALBANIA	1982	1993	786	858	236	113	0	0.72	0
ALBANIA	1983	2081	847	854	266	114	0	0.74	0
ALBANIA	1984	2134	928	804	285	117	0	0.74	0
ALBANIA	1985	2149	1016	752	265	116	0	0.73	0
ALBANIA	1986	2197	1012	783	287	115	0	0.72	0
ALBANIA	1987	2030	1019	770	123	117	0	0.65	0
ALBANIA	1988	1998	1096	703	97	101	0	0.63	0
ALBANIA	1989	2450	1107	1118	122	103	0	0.75	0
ALBANIA	1990	2042	758	1055	127	102	0	0.62	0
ALBANIA	1991	1083	404	522	75	82	0	0.33	0
ALBANIA	1992	651	218	351	54	27	0	0.2	0
ALBANIA	1993	639	164	406	43	27	0	0.2	0
ALBANIA	1994	526	46	439	27	14	0	0.17	0
ALBANIA	1995	569	44	484	14	27	0	0.18	0
ALBANIA	1996	550	31	479	12	28	0	0.18	0
ALBANIA	1997	421	12	385	10	14	0	0.14	0
ALBANIA	1998	478	15	444	9	11	0	0.16	0
ALBANIA	1999	816	33	761	8	14	0	0.27	31
ALBANIA	2000	826	20	776	6	24	0	0.27	34
ALBANIA	2001	881	24	853	4	0	0	0.29	37
ALBANIA	2002	1023	23	992	7	0	0	0.33	37
ALBANIA	2003	1170	23	1061	7	79	0	0.38	42
ALBANIA	2004	1092	23	982	9	78	0	0.35	50
ALBANIA	2005	1255	20	1159	9	67	0	0.4	61
ALBANIA	2006	1154	20	1054	9	71	0	0.37	74
ALBANIA	2007	1222	20	1073	9	121	0	0.39	89
ALBANIA	2008	1139	25	989	4	121	0	0.36	107
ALGERIA	1900	0	0	0	0	0	.	.	0
ALGERIA	1901	0	0	0	0	0	.	.	0
ALGERIA	1902	0	0	0	0	0	.	.	0
ALGERIA	1903	0	0	0	0	0	.	.	0
ALGERIA	1904	0	0	0	0	0	.	.	0
ALGERIA	1905	0	0	0	0	0	.	.	0
ALGERIA	1916	1	0	1	0	0	.	.	0
ALGERIA	1917	2	1	1	0	0	.	.	0
ALGERIA	1918	5	4	1	0	0	.	.	0
ALGERIA	1919	5	5	1	0	0	.	.	0
ALGERIA	1920	6	5	1	0	0	.	.	0
ALGERIA	1921	7	7	0	0	0	.	.	0
ALGERIA	1922	7	7	1	0	0	.	.	0
ALGERIA	1923	4	3	1	0	0	.	.	0
ALGERIA	1924	8	7	2	0	0	.	.	0
ALGERIA	1925	9	7	2	0	0	.	.	0
ALGERIA	1926	11	10	1	0	0	.	.	0
ALGERIA	1927	16	15	1	0	0	.	.	0
ALGERIA	1928	20	12	1	0	7	.	.	0
ALGERIA	1929	22	12	3	0	8	.	.	0
ALGERIA	1930	23	12	2	0	9	.	.	0
ALGERIA	1931	27	15	1	0	10	.	.	0
ALGERIA	1932	31	18	1	0	12	.	.	0
ALGERIA	1933	33	22	1	0	10	.	.	0
ALGERIA	1934	38	25	0	0	13	.	.	0
ALGERIA	1935	36	28	0	0	9	.	.	0
ALGERIA	1936	14	5	0	0	9	.	.	0
ALGERIA	1937	19	10	0	0	9	.	.	0
ALGERIA	1938	9	9	0	0	0	.	.	0
ALGERIA	1939	44	14	0	30	0	.	.	0
ALGERIA	1940	65	40	0	25	0	.	.	0
ALGERIA	1941	85	58	0	27	0	.	.	0
ALGERIA	1942	136	107	0	29	0	.	.	0
ALGERIA	1943	128	85	0	32	11	.	.	0
ALGERIA	1944	136	87	1	36	13	.	.	0
ALGERIA	1945	168	117	0	37	14	.	.	0
ALGERIA	1946	208	156	0	37	16	.	.	0
ALGERIA	1947	203	149	0	37	17	.	.	0
ALGERIA	1948	219	164	0	38	18	.	.	0
ALGERIA	1949	248	192	0	38	17	.	.	0
ALGERIA	1950	1033	514	475	0	44	0	0.12	612
ALGERIA	1951	1128	557	510	0	61	0	0.13	616
ALGERIA	1952	1062	503	493	0	66	0	0.12	563
ALGERIA	1953	1092	422	599	0	70	0	0.12	620
ALGERIA	1954	1134	405	639	0	90	0	0.12	506
ALGERIA	1955	1258	435	731	0	92	0	0.13	606
ALGERIA	1956	1364	481	795	0	89	0	0.14	567
ALGERIA	1957	1512	539	876	0	97	0	0.15	590
ALGERIA	1958	1424	494	815	0	115	0	0.14	484
ALGERIA	1959	1545	399	1016	0	130	0	0.15	445
ALGERIA	1960	1680	343	1193	0	144	0	0.16	438
ALGERIA	1961	1654	209	1177	123	146	0	0.15	437
ALGERIA	1962	1546	111	1129	188	119	0	0.14	263
ALGERIA	1963	1480	69	1126	165	120	0	0.13	335
ALGERIA	1964	1541	77	1032	325	107	0	0.13	284
ALGERIA	1965	1799	72	1140	485	101	0	0.15	230
ALGERIA	1966	2299	74	1630	505	90	0	0.19	217
ALGERIA	1967	2302	52	1663	489	99	0	0.18	227
ALGERIA	1968	2471	55	1783	514	118	0	0.19	219
ALGERIA	1969	3075	123	2148	676	129	0	0.23	186
ALGERIA	1970	4111	265	1866	37	126	1817	0.3	163
ALGERIA	1971	5091	246	2079	184	131	2451	0.36	145
ALGERIA	1972	7731	177	1981	856	126	4591	0.53	128
ALGERIA	1973	10448	224	2559	859	137	6669	0.69	160
ALGERIA	1974	8701	191	2622	669	128	5091	0.56	165
ALGERIA	1975	8735	216	3082	1217	129	4092	0.55	157
ALGERIA	1976	10682	160	3012	1655	190	5666	0.65	290
ALGERIA	1977	11424	165	3785	984	242	6248	0.67	310
ALGERIA	1978	17052	156	3593	6511	367	6425	0.97	380
ALGERIA	1979	12441	244	4192	2229	513	5263	0.68	445
ALGERIA	1980	18140	439	5082	6954	565	5100	0.96	581
ALGERIA	1981	12664	521	4955	3047	607	3533	0.65	649
ALGERIA	1982	10709	539	5088	1957	598	2527	0.53	646
ALGERIA	1983	14351	859	6010	4533	654	2294	0.69	647
ALGERIA	1984	19390	1099	6214	8327	753	2997	0.9	581
ALGERIA	1985	19849	840	6142	7560	829	4478	0.9	403
ALGERIA	1986	20801	744	6212	9030	878	3937	0.91	390
ALGERIA	1987	22940	810	6848	10949	1026	3307	0.98	381
ALGERIA	1988	22893	812	7447	10637	979	3019	0.95	291
ALGERIA	1989	21829	815	6865	10009	927	3213	0.89	291
ALGERIA	1990	21515	825	6835	10619	862	2373	0.85	286
ALGERIA	1991	22214	829	7675	10488	859	2362	0.86	308
ALGERIA	1992	22433	768	8287	8715	870	3793	0.85	274
ALGERIA	1993	22491	597	7640	9852	870	3532	0.83	422
ALGERIA	1994	23548	606	8311	10204	824	3604	0.85	477
ALGERIA	1995	25823	363	7391	12888	928	4252	0.91	534
ALGERIA	1996	26334	239	7480	13801	884	3930	0.92	508
ALGERIA	1997	24051	392	8411	10646	965	3637	0.82	227
ALGERIA	1998	29201	598	9031	14913	1020	3639	0.98	435
ALGERIA	1999	25121	613	6056	13898	1020	3535	0.84	434
ALGERIA	2000	23979	556	8424	10838	1129	3032	0.79	416
ALGERIA	2001	22987	592	7767	11198	1129	2301	0.74	422
ALGERIA	2002	24776	739	8282	12187	1224	2345	0.79	586
ALGERIA	2003	25234	787	8953	12016	1224	2254	0.79	510
ALGERIA	2004	24405	542	9208	11247	1496	1912	0.75	466
ALGERIA	2005	29214	666	8413	16706	1741	1688	0.89	547
ALGERIA	2006	29262	759	9797	14955	1999	1753	0.88	580
ALGERIA	2007	30745	859	11330	13942	2160	2454	0.91	603
ALGERIA	2008	30353	793	11299	13295	2366	2600	0.88	617
ANDORRA	1990
ANDORRA	1991
ANDORRA	1992
ANDORRA	1993
ANDORRA	1994
ANDORRA	1995	111	0	111	0	0	0	1.71	0
ANDORRA	1996	116	0	116	0	0	0	1.78	0
ANDORRA	1997	125	0	125	0	0	0	1.9	0
ANDORRA	1998	132	0	132	0	0	0	2.02	0
ANDORRA	1999	140	0	140	0	0	0	2.14	0
ANDORRA	2000	143	0	143	0	0	0	2.16	0
ANDORRA	2001	143	0	143	0	0	0	2.09	0
ANDORRA	2002	145	0	145	0	0	0	2.04	0
ANDORRA	2003	146	0	146	0	0	0	1.96	0
ANDORRA	2004	154	0	154	0	0	0	2	0
ANDORRA	2005	157	0	157	0	0	0	1.97	0
ANDORRA	2006	149	0	149	0	0	0	1.82	0
ANDORRA	2007	147	0	147	0	0	0	1.77	0
ANDORRA	2008	147	0	147	0	0	0	1.74	0
ANGOLA	1950	51	16	34	0	0	0	0.01	0
ANGOLA	1951	68	26	42	0	0	0	0.02	0
ANGOLA	1952	85	33	52	0	0	0	0.02	0
ANGOLA	1953	75	19	52	0	4	0	0.02	3
ANGOLA	1954	95	21	69	0	6	0	0.02	2
ANGOLA	1955	113	23	80	0	10	0	0.03	2
ANGOLA	1956	137	11	114	0	12	0	0.03	1
ANGOLA	1957	169	22	129	0	18	0	0.04	0
ANGOLA	1958	162	12	127	0	23	0	0.03	14
ANGOLA	1959	169	15	133	0	21	0	0.03	9
ANGOLA	1960	150	34	95	0	22	0	0.03	41
ANGOLA	1961	124	17	85	0	21	0	0.02	64
ANGOLA	1962	322	25	275	0	23	0	0.06	65
ANGOLA	1963	314	6	282	0	26	0	0.06	86
ANGOLA	1964	334	21	284	0	29	0	0.06	138
ANGOLA	1965	324	15	276	0	33	0	0.06	144
ANGOLA	1966	424	24	364	0	36	0	0.08	133
ANGOLA	1967	271	15	218	0	38	0	0.05	233
ANGOLA	1968	456	28	387	0	42	0	0.08	239
ANGOLA	1969	760	25	682	0	52	0	0.13	189
ANGOLA	1970	977	13	476	23	61	405	0.16	227
ANGOLA	1971	930	8	449	23	72	379	0.15	265
ANGOLA	1972	1229	2	676	30	85	437	0.19	177
ANGOLA	1973	1331	6	685	34	105	501	0.2	185
ANGOLA	1974	1329	0	669	36	103	522	0.2	240
ANGOLA	1975	1204	0	595	34	89	486	0.18	193
ANGOLA	1976	896	0	528	30	41	297	0.13	147
ANGOLA	1977	964	0	293	37	41	593	0.13	154
ANGOLA	1978	1476	0	731	37	54	654	0.2	245
ANGOLA	1979	1501	0	756	37	54	654	0.2	274
ANGOLA	1980	1458	0	725	40	33	659	0.19	329
ANGOLA	1981	1440	0	754	47	34	605	0.18	349
ANGOLA	1982	1268	0	589	47	34	599	0.15	329
ANGOLA	1983	1395	0	692	54	30	619	0.16	380
ANGOLA	1984	1366	0	625	60	48	632	0.15	475
ANGOLA	1985	1282	0	535	60	48	639	0.14	650
ANGOLA	1986	1271	0	510	67	48	646	0.13	641
ANGOLA	1987	1586	0	798	81	48	659	0.16	701
ANGOLA	1988	1399	0	520	82	136	661	0.14	714
ANGOLA	1989	1366	0	476	87	136	666	0.13	718
ANGOLA	1990	1208	0	489	276	35	409	0.11	717
ANGOLA	1991	1191	0	425	296	35	435	0.11	722
ANGOLA	1992	1205	0	413	291	41	460	0.11	349
ANGOLA	1993	1582	0	817	286	34	445	0.13	251
ANGOLA	1994	1061	0	354	265	33	409	0.09	359
ANGOLA	1995	3003	0	2307	286	27	383	0.24	324
ANGOLA	1996	2861	0	1930	286	37	608	0.22	283
ANGOLA	1997	2013	0	909	291	41	772	0.15	285
ANGOLA	1998	1993	0	754	296	48	895	0.15	182
ANGOLA	1999	2497	0	1012	286	28	1171	0.18	320
ANGOLA	2000	2602	0	1001	296	27	1278	0.18	384
ANGOLA	2001	2654	0	1174	270	75	1135	0.18	416
ANGOLA	2002	3454	0	1370	316	81	1687	0.23	357
ANGOLA	2003	2472	0	1866	332	95	179	0.16	128
ANGOLA	2004	5125	0	1374	393	103	3255	0.32	351
ANGOLA	2005	5224	0	1292	341	179	3412	0.31	246
ANGOLA	2006	6072	0	2117	356	187	3412	0.36	80
ANGOLA	2007	6859	0	2402	435	190	3832	0.39	107
ANGOLA	2008	6646	0	2476	347	190	3633	0.37	126
ANGUILLA	1990
ANGUILLA	1991
ANGUILLA	1992
ANGUILLA	1993
ANGUILLA	1994
ANGUILLA	1995
ANGUILLA	1996
ANGUILLA	1997	5	0	5	0	0	0	0.49	0
ANGUILLA	1998	7	0	7	0	0	0	0.64	0
ANGUILLA	1999	7	0	7	0	0	0	0.62	0
ANGUILLA	2000	9	0	9	0	0	0	0.83	0
ANGUILLA	2001	10	0	10	0	0	0	0.87	0
ANGUILLA	2002	10	0	10	0	0	0	0.83	0
ANGUILLA	2003	11	0	11	0	0	0	0.86	0
ANGUILLA	2004	12	0	12	0	0	0	0.89	0
ANGUILLA	2005	14	0	14	0	0	0	1.04	0
ANGUILLA	2006	14	0	14	0	0	0	1.01	0
ANGUILLA	2007	16	0	16	0	0	0	1.1	0
ANGUILLA	2008	16	0	16	0	0	0	1.07	0
ANTARCTIC FISHERIES	1987	1	0	1	0	0	0	0.84	55
ANTARCTIC FISHERIES	1988	2	0	2	0	0	0	1.67	56
ANTARCTIC FISHERIES	1989	2	0	2	0	0	0	1.67	55
ANTARCTIC FISHERIES	1990	3	0	3	0	0	0	2.51	55
ANTARCTIC FISHERIES	1991	4	0	4	0	0	0	4.19	56
ANTARCTIC FISHERIES	1992	4	0	4	0	0	0	4.19	56
ANTARCTIC FISHERIES	1993	4	0	4	0	0	0	4.19	56
ANTARCTIC FISHERIES	1994	4	0	4	0	0	0	4.19	56
ANTARCTIC FISHERIES	1995	1	0	1	0	0	0	0.84	61
ANTARCTIC FISHERIES	1996	1	0	1	0	0	0	0.84	61
ANTARCTIC FISHERIES	1997	1	0	1	0	0	0	0.84	61
ANTARCTIC FISHERIES	1998	1	0	1	0	0	0	0.84	61
ANTARCTIC FISHERIES	1999	1	0	1	0	0	0	0.84	61
ANTARCTIC FISHERIES	2000	1	0	1	0	0	0	0.84	62
ANTARCTIC FISHERIES	2001	1	0	1	0	0	0	0.84	63
ANTARCTIC FISHERIES	2002	1	0	1	0	0	0	0.84	63
ANTARCTIC FISHERIES	2003	1	0	1	0	0	0	0.84	63
ANTARCTIC FISHERIES	2004	2	0	2	0	0	0	1.67	63
ANTARCTIC FISHERIES	2005	2	0	2	0	0	0	1.67	63
ANTARCTIC FISHERIES	2006	2	0	2	0	0	0	1.67	63
ANTARCTIC FISHERIES	2007	3	0	3	0	0	0	2.51	63
ANTARCTIC FISHERIES	2008
ANTIGUA & BARBUDA	1957	6	0	6	0	0	0	0.11	0
ANTIGUA & BARBUDA	1958	8	0	8	0	0	0	0.16	0
ANTIGUA & BARBUDA	1959	8	0	8	0	0	0	0.16	0
ANTIGUA & BARBUDA	1960	10	0	10	0	0	0	0.18	0
ANTIGUA & BARBUDA	1961	13	0	13	0	0	0	0.23	0
ANTIGUA & BARBUDA	1962	28	0	28	0	0	0	0.49	0
ANTIGUA & BARBUDA	1963	23	0	23	0	0	0	0.39	0
ANTIGUA & BARBUDA	1964	25	0	25	0	0	0	0.42	0
ANTIGUA & BARBUDA	1965	41	0	41	0	0	0	0.67	2
ANTIGUA & BARBUDA	1966	95	0	95	0	0	0	1.51	4
ANTIGUA & BARBUDA	1967	154	0	154	0	0	0	2.39	0
ANTIGUA & BARBUDA	1968	270	0	270	0	0	0	4.1	0
ANTIGUA & BARBUDA	1969	343	0	343	0	0	0	5.08	0
ANTIGUA & BARBUDA	1970	126	0	126	0	0	0	1.81	191
ANTIGUA & BARBUDA	1971	116	0	116	0	0	0	1.64	273
ANTIGUA & BARBUDA	1972	102	0	102	0	0	0	1.4	285
ANTIGUA & BARBUDA	1973	90	0	90	0	0	0	1.21	260
ANTIGUA & BARBUDA	1974	117	0	117	0	0	0	1.55	152
ANTIGUA & BARBUDA	1975	193	0	193	0	0	0	2.52	38
ANTIGUA & BARBUDA	1976	110	0	110	0	0	0	1.44	57
ANTIGUA & BARBUDA	1977	127	0	127	0	0	0	1.68	49
ANTIGUA & BARBUDA	1978	134	0	134	0	0	0	1.8	51
ANTIGUA & BARBUDA	1979	111	0	111	0	0	0	1.52	55
ANTIGUA & BARBUDA	1980	39	0	39	0	0	0	0.54	47
ANTIGUA & BARBUDA	1981	29	0	29	0	0	0	0.41	24
ANTIGUA & BARBUDA	1982	80	0	80	0	0	0	1.13	44
ANTIGUA & BARBUDA	1983	23	0	23	0	0	0	0.32	13
ANTIGUA & BARBUDA	1984	40	0	40	0	0	0	0.58	46
ANTIGUA & BARBUDA	1985	68	0	68	0	0	0	1	28
ANTIGUA & BARBUDA	1986	68	0	68	0	0	0	1.02	32
ANTIGUA & BARBUDA	1987	75	0	75	0	0	0	1.15	28
ANTIGUA & BARBUDA	1988	78	0	78	0	0	0	1.23	29
ANTIGUA & BARBUDA	1989	78	0	78	0	0	0	1.25	29
ANTIGUA & BARBUDA	1990	82	0	82	0	0	0	1.33	29
ANTIGUA & BARBUDA	1991	80	0	80	0	0	0	1.28	30
ANTIGUA & BARBUDA	1992	80	0	80	0	0	0	1.26	30
ANTIGUA & BARBUDA	1993	84	0	84	0	0	0	1.29	32
ANTIGUA & BARBUDA	1994	85	0	85	0	0	0	1.29	36
ANTIGUA & BARBUDA	1995	88	0	88	0	0	0	1.29	36
ANTIGUA & BARBUDA	1996	88	0	88	0	0	0	1.26	36
ANTIGUA & BARBUDA	1997	92	0	92	0	0	0	1.28	37
ANTIGUA & BARBUDA	1998	91	0	91	0	0	0	1.24	37
ANTIGUA & BARBUDA	1999	95	0	95	0	0	0	1.26	38
ANTIGUA & BARBUDA	2000	94	0	94	0	0	0	1.22	40
ANTIGUA & BARBUDA	2001	94	0	94	0	0	0	1.19	40
ANTIGUA & BARBUDA	2002	99	0	99	0	0	0	1.23	44
ANTIGUA & BARBUDA	2003	106	0	106	0	0	0	1.31	43
ANTIGUA & BARBUDA	2004	111	0	111	0	0	0	1.34	44
ANTIGUA & BARBUDA	2005	112	0	112	0	0	0	1.34	44
ANTIGUA & BARBUDA	2006	116	0	116	0	0	0	1.38	44
ANTIGUA & BARBUDA	2007	119	0	119	0	0	0	1.39	45
ANTIGUA & BARBUDA	2008	122	0	122	0	0	0	1.41	46
ARGENTINA	1887	296	296	0	0	0	.	.	0
ARGENTINA	1888	243	243	0	0	0	.	.	0
ARGENTINA	1889	479	479	0	0	0	.	.	0
ARGENTINA	1890	374	374	0	0	0	.	.	0
ARGENTINA	1891	256	256	0	0	0	.	.	0
ARGENTINA	1892	378	378	0	0	0	.	.	0
ARGENTINA	1893	424	424	0	0	0	.	.	0
ARGENTINA	1894	544	544	0	0	0	.	.	0
ARGENTINA	1895	618	618	0	0	0	.	.	0
ARGENTINA	1896	629	629	0	0	0	.	.	0
ARGENTINA	1897	568	568	0	0	0	.	.	0
ARGENTINA	1898	641	641	0	0	0	.	.	0
ARGENTINA	1899	797	797	0	0	0	.	.	0
ARGENTINA	1900	565	565	0	0	0	.	.	0
ARGENTINA	1901	680	680	0	0	0	.	.	0
ARGENTINA	1902	768	768	0	0	0	.	.	0
ARGENTINA	1903	781	781	0	0	0	.	.	0
ARGENTINA	1904	1036	1036	0	0	0	.	.	0
ARGENTINA	1905	1087	1087	0	0	0	.	.	0
ARGENTINA	1906	1707	1707	0	0	0	.	.	0
ARGENTINA	1907	1707	1707	0	0	0	.	.	0
ARGENTINA	1908	2079	2077	2	0	0	.	.	0
ARGENTINA	1909	1620	1618	3	0	0	.	.	0
ARGENTINA	1910	2431	2429	3	0	0	.	.	0
ARGENTINA	1911	2714	2712	2	0	0	.	.	0
ARGENTINA	1912	2587	2581	6	0	0	.	.	0
ARGENTINA	1913	2769	2752	16	0	0	.	.	0
ARGENTINA	1914	2367	2332	33	1	0	.	.	0
ARGENTINA	1915	1894	1828	62	3	0	.	.	0
ARGENTINA	1916	1361	1251	105	4	0	.	.	0
ARGENTINA	1917	609	454	148	7	0	.	.	0
ARGENTINA	1918	688	516	164	8	0	.	.	0
ARGENTINA	1919	1017	847	162	8	0	.	.	0
ARGENTINA	1920	1608	1398	200	10	0	.	.	0
ARGENTINA	1921	1512	1246	253	13	0	.	.	0
ARGENTINA	1922	1992	1608	368	17	0	.	.	0
ARGENTINA	1923	2305	1867	416	21	0	.	.	0
ARGENTINA	1924	2991	2389	567	35	0	.	.	0
ARGENTINA	1925	3067	2279	743	45	0	.	.	0
ARGENTINA	1926	3073	2033	959	80	0	.	.	0
ARGENTINA	1927	3650	2526	1052	71	0	.	.	0
ARGENTINA	1928	3477	2261	1103	81	32	.	.	0
ARGENTINA	1929	3584	2271	1140	125	48	.	.	0
ARGENTINA	1930	3485	2216	1093	124	52	.	.	0
ARGENTINA	1931	3506	1896	1383	154	73	.	.	0
ARGENTINA	1932	3576	1728	1570	210	68	.	.	0
ARGENTINA	1933	3612	1626	1633	282	70	.	.	0
ARGENTINA	1934	3887	1796	1673	341	77	.	.	0
ARGENTINA	1935	3821	1729	1705	288	98	.	.	0
ARGENTINA	1936	4121	1907	1852	249	113	.	.	0
ARGENTINA	1937	4562	2227	1959	236	141	.	.	0
ARGENTINA	1938	4463	2018	2046	229	169	.	.	0
ARGENTINA	1939	4744	2119	2230	242	153	.	.	0
ARGENTINA	1940	4331	1465	2468	250	147	.	.	0
ARGENTINA	1941	3806	733	2637	277	159	.	.	0
ARGENTINA	1942	3680	378	2840	315	146	.	.	0
ARGENTINA	1943	3843	423	2975	316	130	.	.	0
ARGENTINA	1944	3809	450	2903	309	147	.	.	0
ARGENTINA	1945	3731	558	2741	284	148	.	.	0
ARGENTINA	1946	3741	830	2492	264	155	.	.	0
ARGENTINA	1947	3963	888	2617	272	185	.	.	0
ARGENTINA	1948	4748	1587	2782	209	170	.	.	0
ARGENTINA	1949	4195	982	2706	310	197	.	.	0
ARGENTINA	1950	8168	972	6982	0	214	0	0.48	124
ARGENTINA	1951	9544	1493	7452	387	212	0	0.54	127
ARGENTINA	1952	9853	1230	7993	419	211	0	0.55	110
ARGENTINA	1953	9591	850	8190	326	225	0	0.53	169
ARGENTINA	1954	10032	1016	8455	330	232	0	0.54	186
ARGENTINA	1955	10799	876	9334	335	254	0	0.57	188
ARGENTINA	1956	12092	1041	10414	356	281	0	0.63	197
ARGENTINA	1957	12996	917	11359	398	322	0	0.66	214
ARGENTINA	1958	12064	1032	10292	404	336	0	0.6	231
ARGENTINA	1959	13362	1018	11620	402	322	0	0.66	222
ARGENTINA	1960	13312	1066	11242	645	359	0	0.64	211
ARGENTINA	1961	13957	966	11496	1100	395	0	0.66	241
ARGENTINA	1962	14643	548	12303	1394	398	0	0.69	211
ARGENTINA	1963	13658	629	11093	1591	345	0	0.63	315
ARGENTINA	1964	15197	698	12339	1765	396	0	0.69	268
ARGENTINA	1965	16053	710	12916	1978	449	0	0.72	333
ARGENTINA	1966	17218	706	13256	2142	474	640	0.76	370
ARGENTINA	1967	17874	802	13584	2240	483	763	0.78	363
ARGENTINA	1968	18839	646	14345	2495	568	785	0.81	368
ARGENTINA	1969	21088	707	16532	2485	591	773	0.89	338
ARGENTINA	1970	22562	897	17447	2806	645	767	0.94	390
ARGENTINA	1971	24254	799	18919	3008	752	776	0.99	512
ARGENTINA	1972	24586	780	18913	3403	741	749	0.99	207
ARGENTINA	1973	25652	786	19435	3872	705	854	1.02	128
ARGENTINA	1974	26062	919	19501	4073	733	836	1.02	119
ARGENTINA	1975	25888	981	18808	4291	743	1065	1	82
ARGENTINA	1976	27212	884	19614	4494	777	1442	1.03	161
ARGENTINA	1977	27486	738	19843	4614	816	1476	1.02	311
ARGENTINA	1978	27990	1046	19896	4483	859	1706	1.03	307
ARGENTINA	1979	30189	983	21581	4917	907	1801	1.09	359
ARGENTINA	1980	29653	782	20881	5340	970	1680	1.05	383
ARGENTINA	1981	27827	807	19121	5591	904	1404	0.97	404
ARGENTINA	1982	28204	726	18840	6345	765	1527	0.97	500
ARGENTINA	1983	28692	598	18743	7168	765	1418	0.98	613
ARGENTINA	1984	29049	586	18350	7451	710	1951	0.97	591
ARGENTINA	1985	27433	757	16495	7863	630	1689	0.91	569
ARGENTINA	1986	28419	926	16976	8451	755	1311	0.93	390
ARGENTINA	1987	31345	1031	18137	10016	857	1304	1.01	548
ARGENTINA	1988	33126	1098	18076	11526	823	1602	1.05	486
ARGENTINA	1989	31931	1131	16308	12175	608	1709	1	628
ARGENTINA	1990	30710	838	16154	11794	491	1434	0.95	628
ARGENTINA	1991	31912	734	16712	12905	462	1100	0.97	410
ARGENTINA	1992	33119	765	17367	13183	687	1116	0.99	415
ARGENTINA	1993	32345	628	18327	11137	768	1484	0.96	332
ARGENTINA	1994	33638	972	18342	11648	854	1823	0.98	334
ARGENTINA	1995	33419	1010	17149	14518	741	0	0.96	410
ARGENTINA	1996	35238	846	17992	15705	696	0	1	495
ARGENTINA	1997	36727	758	18250	16786	933	0	1.03	548
ARGENTINA	1998	37544	775	18989	16816	964	0	1.04	469
ARGENTINA	1999	39675	588	19654	18455	977	0	1.09	512
ARGENTINA	2000	38472	452	18237	18951	832	0	1.04	433
ARGENTINA	2001	38307	352	19513	17688	754	0	1.03	487
ARGENTINA	2002	35835	300	17912	17090	532	0	0.95	1019
ARGENTINA	2003	38819	543	18715	18851	710	0	1.02	1029
ARGENTINA	2004	42269	600	21211	19608	851	0	1.1	1062
ARGENTINA	2005	43339	928	21320	20058	1033	0	1.12	1198
ARGENTINA	2006	47867	861	24498	21294	1214	0	1.22	1216
ARGENTINA	2007	50103	1118	24383	23296	1306	0	1.27	1400
ARGENTINA	2008	52462	1298	25248	24596	1320	0	1.32	1496
ARMENIA	1990
ARMENIA	1991
ARMENIA	1992	1004	102	0	848	54	0	0.29	0
ARMENIA	1993	799	2	350	419	27	0	0.24	0
ARMENIA	1994	809	26	327	441	14	0	0.25	0
ARMENIA	1995	952	2	204	714	31	0	0.3	29
ARMENIA	1996	711	4	113	557	38	0	0.22	16
ARMENIA	1997	894	4	119	731	40	0	0.29	17
ARMENIA	1998	929	4	122	762	41	0	0.3	18
ARMENIA	1999	834	2	172	621	39	0	0.27	18
ARMENIA	2000	945	0	215	700	30	0	0.31	52
ARMENIA	2001	966	0	212	713	41	0	0.31	50
ARMENIA	2002	819	13	223	536	48	0	0.27	44
ARMENIA	2003	935	20	255	608	52	0	0.31	22
ARMENIA	2004	994	0	251	675	68	0	0.32	32
ARMENIA	2005	1186	0	268	836	82	0	0.39	38
ARMENIA	2006	1194	1	251	857	85	0	0.39	33
ARMENIA	2007	1379	2	252	1026	98	0	0.45	50
ARMENIA	2008	1513	1	282	1125	105	0	0.49	48
ARUBA	1986	49	0	49	0	0	0	0.76	0
ARUBA	1987	122	0	122	0	0	0	1.94	0
ARUBA	1988	167	0	167	0	0	0	2.67	0
ARUBA	1989	177	0	177	0	0	0	2.84	0
ARUBA	1990	502	0	502	0	0	0	7.94	0
ARUBA	1991	526	0	526	0	0	0	8.02	0
ARUBA	1992	470	0	470	0	0	0	6.82	0
ARUBA	1993	483	0	483	0	0	0	6.62	0
ARUBA	1994	481	0	481	0	0	0	6.26	0
ARUBA	1995	487	0	487	0	0	0	6.06	0
ARUBA	1996	494	0	494	0	0	0	5.95	0
ARUBA	1997	505	0	505	0	0	0	5.92	0
ARUBA	1998	455	0	455	0	0	0	5.22	53
ARUBA	1999	460	0	460	0	0	0	5.18	55
ARUBA	2000	609	0	609	0	0	0	6.71	56
ARUBA	2001	610	0	610	0	0	0	6.58	58
ARUBA	2002	615	0	615	0	0	0	6.47	61
ARUBA	2003	615	0	615	0	0	0	6.34	62
ARUBA	2004	616	0	616	0	0	0	6.21	62
ARUBA	2005	620	0	620	0	0	0	6.13	64
ARUBA	2006	620	0	620	0	0	0	6.03	64
ARUBA	2007	643	0	643	0	0	0	6.17	66
ARUBA	2008	624	0	624	0	0	0	5.91	67
AUSTRALIA	1851	-17	-17	0	0	0	.	.	0
AUSTRALIA	1852	-15	-15	0	0	0	.	.	0
AUSTRALIA	1853	-30	-30	0	0	0	.	.	0
AUSTRALIA	1854	-35	-35	0	0	0	.	.	0
AUSTRALIA	1855	-36	-36	0	0	0	.	.	0
AUSTRALIA	1856	-50	-50	0	0	0	.	.	0
AUSTRALIA	1857	-57	-57	0	0	0	.	.	0
AUSTRALIA	1858	-67	-67	0	0	0	.	.	0
AUSTRALIA	1859	-103	-103	0	0	0	.	.	0
AUSTRALIA	1860	76	76	0	0	0	.	.	0
AUSTRALIA	1861	139	139	0	0	0	.	.	0
AUSTRALIA	1862	97	97	0	0	0	.	.	0
AUSTRALIA	1863	109	109	0	0	0	.	.	0
AUSTRALIA	1864	73	73	0	0	0	.	.	0
AUSTRALIA	1865	115	115	0	0	0	.	.	0
AUSTRALIA	1866	190	190	0	0	0	.	.	0
AUSTRALIA	1867	244	244	0	0	0	.	.	0
AUSTRALIA	1868	200	200	0	0	0	.	.	0
AUSTRALIA	1869	175	175	0	0	0	.	.	0
AUSTRALIA	1870	164	164	0	0	0	.	.	0
AUSTRALIA	1871	189	189	0	0	0	.	.	0
AUSTRALIA	1872	193	193	0	0	0	.	.	0
AUSTRALIA	1873	237	237	0	0	0	.	.	0
AUSTRALIA	1874	243	243	0	0	0	.	.	0
AUSTRALIA	1875	226	226	0	0	0	.	.	0
AUSTRALIA	1876	254	254	0	0	0	.	.	0
AUSTRALIA	1877	291	291	0	0	0	.	.	0
AUSTRALIA	1878	264	264	0	0	0	.	.	0
AUSTRALIA	1879	397	397	0	0	0	.	.	0
AUSTRALIA	1880	602	602	0	0	0	.	.	0
AUSTRALIA	1881	482	482	0	0	0	.	.	0
AUSTRALIA	1882	549	549	0	0	0	.	.	0
AUSTRALIA	1883	662	662	0	0	0	.	.	0
AUSTRALIA	1884	702	702	0	0	0	.	.	0
AUSTRALIA	1885	793	793	0	0	0	.	.	0
AUSTRALIA	1886	788	788	0	0	0	.	.	0
AUSTRALIA	1887	828	828	0	0	0	.	.	0
AUSTRALIA	1888	963	963	0	0	0	.	.	0
AUSTRALIA	1889	935	935	0	0	0	.	.	0
AUSTRALIA	1890	968	968	0	0	0	.	.	0
AUSTRALIA	1891	1094	1094	0	0	0	.	.	0
AUSTRALIA	1892	1133	1133	0	0	0	.	.	0
AUSTRALIA	1893	1082	1082	0	0	0	.	.	0
AUSTRALIA	1894	1190	1190	0	0	0	.	.	0
AUSTRALIA	1895	1253	1253	0	0	0	.	.	0
AUSTRALIA	1896	1229	1229	0	0	0	.	.	0
AUSTRALIA	1897	1358	1358	0	0	0	.	.	0
AUSTRALIA	1898	1532	1532	0	0	0	.	.	0
AUSTRALIA	1899	1579	1546	33	0	0	.	.	0
AUSTRALIA	1900	2775	2742	33	0	0	.	.	0
AUSTRALIA	1901	3122	3058	64	0	0	.	.	0
AUSTRALIA	1902	3110	3079	30	0	0	.	.	0
AUSTRALIA	1903	3062	3016	46	0	0	.	.	0
AUSTRALIA	1904	3151	3106	46	0	0	.	.	0
AUSTRALIA	1905	3288	3240	49	0	0	.	.	0
AUSTRALIA	1906	3919	3870	49	0	0	.	.	0
AUSTRALIA	1907	4224	4166	58	0	0	.	.	0
AUSTRALIA	1908	4573	4521	52	0	0	.	.	0
AUSTRALIA	1909	3987	3911	76	0	0	.	.	0
AUSTRALIA	1910	4841	4759	82	0	0	.	.	0
AUSTRALIA	1911	5342	5251	91	0	0	.	.	0
AUSTRALIA	1912	5801	5673	128	0	0	.	.	0
AUSTRALIA	1913	6214	6111	104	0	0	.	.	0
AUSTRALIA	1914	6681	6681	0	0	0	.	.	0
AUSTRALIA	1915	6061	5948	113	0	0	.	.	0
AUSTRALIA	1916	5406	5260	146	0	0	.	.	0
AUSTRALIA	1917	5815	5666	149	0	0	.	.	0
AUSTRALIA	1918	6373	6261	113	0	0	.	.	0
AUSTRALIA	1919	6070	5933	137	0	0	.	.	0
AUSTRALIA	1920	7157	7023	134	0	0	.	.	0
AUSTRALIA	1921	6514	6319	195	0	0	.	.	0
AUSTRALIA	1922	6808	6644	164	0	0	.	.	0
AUSTRALIA	1923	7007	6782	225	0	0	.	.	0
AUSTRALIA	1924	7683	7388	295	0	0	.	.	0
AUSTRALIA	1925	8083	7706	378	0	0	.	.	0
AUSTRALIA	1926	8065	7602	463	0	0	.	.	0
AUSTRALIA	1927	8711	7886	825	0	0	.	.	0
AUSTRALIA	1928	8086	7071	910	0	104	.	.	0
AUSTRALIA	1929	7558	6358	1102	0	98	.	.	0
AUSTRALIA	1930	7283	5917	1270	0	96	.	.	0
AUSTRALIA	1931	6279	5281	944	0	54	.	.	0
AUSTRALIA	1932	5552	5518	0	0	34	.	.	0
AUSTRALIA	1933	6965	5846	1075	0	44	.	.	0
AUSTRALIA	1934	7361	6138	1166	0	57	.	.	0
AUSTRALIA	1935	8113	6810	1227	0	76	.	.	0
AUSTRALIA	1936	8826	7294	1443	0	89	.	.	0
AUSTRALIA	1937	9417	7777	1541	0	100	.	.	0
AUSTRALIA	1938	9333	7602	1681	0	49	.	.	0
AUSTRALIA	1939	10599	8680	1827	0	93	.	.	0
AUSTRALIA	1940	9969	7831	2043	0	96	.	.	0
AUSTRALIA	1941	11006	9335	1577	0	94	.	.	0
AUSTRALIA	1942	11984	9886	2022	0	77	.	.	0
AUSTRALIA	1943	11743	9497	2192	0	54	.	.	0
AUSTRALIA	1944	11952	9277	2616	0	60	.	.	0
AUSTRALIA	1945	11405	8828	2482	0	96	.	.	0
AUSTRALIA	1946	12362	9568	2695	0	100	.	.	0
AUSTRALIA	1947	13004	10254	2628	0	122	.	.	0
AUSTRALIA	1948	13279	10347	2792	0	140	.	.	0
AUSTRALIA	1949	13604	10130	3328	0	146	.	.	0
AUSTRALIA	1950	14941	12028	2739	0	174	0	1.82	758
AUSTRALIA	1951	16112	12581	3363	0	168	0	1.91	825
AUSTRALIA	1952	16432	12835	3412	0	185	0	1.91	753
AUSTRALIA	1953	16223	13163	2842	0	217	0	1.84	676
AUSTRALIA	1954	18517	13956	4301	0	260	0	2.06	719
AUSTRALIA	1955	19291	13987	5033	0	271	0	2.1	983
AUSTRALIA	1956	19934	13986	5657	0	291	0	2.12	1123
AUSTRALIA	1957	20340	14090	5934	0	316	0	2.12	1221
AUSTRALIA	1958	21184	14371	6479	0	334	0	2.16	1136
AUSTRALIA	1959	22849	15472	7021	0	356	0	2.27	1088
AUSTRALIA	1960	24053	16083	7590	0	380	0	2.34	1219
AUSTRALIA	1961	24704	16368	7946	0	389	0	2.35	1236
AUSTRALIA	1962	25883	16781	8702	1	399	0	2.4	1147
AUSTRALIA	1963	27551	17393	9732	2	424	0	2.5	1253
AUSTRALIA	1964	29719	18323	10902	2	493	0	2.64	1400
AUSTRALIA	1965	32988	19394	13075	2	517	0	2.86	1520
AUSTRALIA	1966	32815	19487	12826	2	500	0	2.79	1662
AUSTRALIA	1967	35251	20580	14149	2	520	0	2.93	1884
AUSTRALIA	1968	36712	20902	15273	3	534	0	2.99	2154
AUSTRALIA	1969	38794	21282	16793	133	586	0	3.1	2127
AUSTRALIA	1970	40256	20277	18615	752	613	0	3.16	2187
AUSTRALIA	1971	41662	20268	19638	1119	637	0	3.22	2369
AUSTRALIA	1972	42947	21216	19464	1595	671	0	3.28	2283
AUSTRALIA	1973	46630	21756	22390	1770	714	0	3.51	2637
AUSTRALIA	1974	47002	23254	20936	2104	708	0	3.5	2672
AUSTRALIA	1975	47964	23729	21269	2284	682	0	3.52	2444
AUSTRALIA	1976	47517	24255	20047	2527	688	0	3.44	1766
AUSTRALIA	1977	51210	26250	21260	3016	683	0	3.65	1895
AUSTRALIA	1978	55090	28406	22238	3767	679	0	3.87	1953
AUSTRALIA	1979	55923	29289	21749	4172	713	0	3.86	1741
AUSTRALIA	1980	60198	32202	22441	4823	733	0	4.1	1627
AUSTRALIA	1981	62820	33063	23383	5557	817	0	4.21	1572
AUSTRALIA	1982	63845	33699	23216	6149	781	0	4.22	1389
AUSTRALIA	1983	61359	33376	20985	6220	658	120	4	1382
AUSTRALIA	1984	64520	34920	22218	6564	743	75	4.15	1273
AUSTRALIA	1985	65784	37033	19626	8228	801	96	4.16	998
AUSTRALIA	1986	65439	36697	20182	7667	806	87	4.08	1172
AUSTRALIA	1987	69841	40227	20838	7907	798	70	4.28	1246
AUSTRALIA	1988	71215	41076	21072	8102	870	95	4.29	1407
AUSTRALIA	1989	75749	44157	22226	8282	938	146	4.5	1616
AUSTRALIA	1990	78356	45467	22553	9238	962	136	4.58	1725
AUSTRALIA	1991	76774	46396	21607	7785	831	155	4.43	1717
AUSTRALIA	1992	80299	48980	21504	8958	736	122	4.58	1823
AUSTRALIA	1993	82388	47991	24215	9321	748	114	4.65	1976
AUSTRALIA	1994	82890	48262	23918	9739	884	87	4.63	2079
AUSTRALIA	1995	83838	48724	23676	10457	884	97	4.63	2295
AUSTRALIA	1996	89790	52644	25632	10498	850	167	4.9	2430
AUSTRALIA	1997	90980	55107	24282	10575	877	139	4.91	2433
AUSTRALIA	1998	94604	58613	23844	11070	932	144	5.05	2535
AUSTRALIA	1999	88771	51731	24350	11467	1013	210	4.69	2621
AUSTRALIA	2000	89884	51816	24846	12039	1020	163	4.69	2722
AUSTRALIA	2001	88590	52789	21975	12686	1020	120	4.56	2836
AUSTRALIA	2002	93100	54021	24530	13399	1027	123	4.74	2338
AUSTRALIA	2003	94485	54141	25295	13840	1088	121	4.75	2492
AUSTRALIA	2004	95234	55418	24411	14207	1088	110	4.73	2602
AUSTRALIA	2005	100189	57647	26816	14397	1224	105	4.91	2937
AUSTRALIA	2006	102913	59003	27941	14636	1224	109	4.99	3069
AUSTRALIA	2007	103849	59080	27324	16112	1224	108	4.98	3180
AUSTRALIA	2008	108868	61654	29881	16071	1156	106	5.17	3257
AUSTRIA	1807	46	46	0	0	0	.	.	0
AUSTRIA	1819	69	69	0	0	0	.	.	0
AUSTRIA	1820	91	91	0	0	0	.	.	0
AUSTRIA	1821	98	98	0	0	0	.	.	0
AUSTRIA	1822	100	100	0	0	0	.	.	0
AUSTRIA	1823	95	95	0	0	0	.	.	0
AUSTRIA	1824	109	109	0	0	0	.	.	0
AUSTRIA	1825	110	110	0	0	0	.	.	0
AUSTRIA	1826	125	125	0	0	0	.	.	0
AUSTRIA	1827	130	130	0	0	0	.	.	0
AUSTRIA	1828	125	125	0	0	0	.	.	0
AUSTRIA	1829	130	130	0	0	0	.	.	0
AUSTRIA	1830	135	135	0	0	0	.	.	0
AUSTRIA	1831	131	131	0	0	0	.	.	0
AUSTRIA	1832	140	140	0	0	0	.	.	0
AUSTRIA	1833	117	117	0	0	0	.	.	0
AUSTRIA	1834	160	160	0	0	0	.	.	0
AUSTRIA	1835	173	173	0	0	0	.	.	0
AUSTRIA	1836	184	184	0	0	0	.	.	0
AUSTRIA	1837	193	193	0	0	0	.	.	0
AUSTRIA	1838	232	232	0	0	0	.	.	0
AUSTRIA	1839	289	289	0	0	0	.	.	0
AUSTRIA	1840	319	319	0	0	0	.	.	0
AUSTRIA	1841	360	360	0	0	0	.	.	0
AUSTRIA	1842	398	398	0	0	0	.	.	0
AUSTRIA	1843	346	346	0	0	0	.	.	0
AUSTRIA	1844	435	435	0	0	0	.	.	0
AUSTRIA	1845	491	491	0	0	0	.	.	0
AUSTRIA	1846	577	577	0	0	0	.	.	0
AUSTRIA	1847	568	568	0	0	0	.	.	0
AUSTRIA	1848	637	637	0	0	0	.	.	0
AUSTRIA	1849	617	617	0	0	0	.	.	0
AUSTRIA	1850	635	635	0	0	0	.	.	0
AUSTRIA	1851	637	637	0	0	0	.	.	0
AUSTRIA	1852	767	767	0	0	0	.	.	0
AUSTRIA	1853	880	880	0	0	0	.	.	0
AUSTRIA	1854	867	867	0	0	0	.	.	0
AUSTRIA	1855	1010	1010	0	0	0	.	.	0
AUSTRIA	1856	1155	1155	0	0	0	.	.	0
AUSTRIA	1857	1330	1330	0	0	0	.	.	0
AUSTRIA	1858	1977	1977	0	0	0	.	.	0
AUSTRIA	1859	1601	1601	0	0	0	.	.	0
AUSTRIA	1860	1678	1678	0	0	0	.	.	0
AUSTRIA	1861	1741	1741	0	0	0	.	.	0
AUSTRIA	1862	1734	1734	0	0	0	.	.	0
AUSTRIA	1863	1604	1604	0	0	0	.	.	0
AUSTRIA	1864	1385	1383	3	0	0	.	.	0
AUSTRIA	1865	1461	1459	2	0	0	.	.	0
AUSTRIA	1866	981	977	4	0	0	.	.	0
AUSTRIA	1867	1341	1336	5	0	0	.	.	0
AUSTRIA	1868	1657	1648	10	0	0	.	.	0
AUSTRIA	1869	1770	1754	16	0	0	.	.	0
AUSTRIA	1870	2010	1984	26	0	0	.	.	0
AUSTRIA	1871	2768	2734	33	0	0	.	.	0
AUSTRIA	1872	2731	2692	39	0	0	.	.	0
AUSTRIA	1873	2928	2874	54	0	0	.	.	0
AUSTRIA	1874	2498	2441	57	0	0	.	.	0
AUSTRIA	1875	2145	2077	67	0	0	.	.	0
AUSTRIA	1876	2208	2117	91	0	0	.	.	0
AUSTRIA	1877	1988	1901	87	0	0	.	.	0
AUSTRIA	1878	1976	1888	88	0	0	.	.	0
AUSTRIA	1879	2419	2342	78	0	0	.	.	0
AUSTRIA	1880	6454	6359	95	0	0	.	.	0
AUSTRIA	1881	2815	2692	123	0	0	.	.	0
AUSTRIA	1882	2893	2790	103	0	0	.	.	0
AUSTRIA	1883	3210	3120	90	0	0	.	.	0
AUSTRIA	1884	3128	3019	109	0	0	.	.	0
AUSTRIA	1885	3288	3173	115	0	0	.	.	0
AUSTRIA	1886	3103	2998	106	0	0	.	.	0
AUSTRIA	1887	3345	3251	93	0	0	.	.	0
AUSTRIA	1888	3262	3163	99	0	0	.	.	0
AUSTRIA	1889	3514	3399	114	0	0	.	.	0
AUSTRIA	1890	3558	3453	105	0	0	.	.	0
AUSTRIA	1891	4079	3964	115	0	0	.	.	0
AUSTRIA	1892	3948	3824	124	0	0	.	.	0
AUSTRIA	1893	4831	4697	134	0	0	.	.	0
AUSTRIA	1894	4948	4833	115	0	0	.	.	0
AUSTRIA	1895	5560	5457	103	0	0	.	.	0
AUSTRIA	1896	5813	5776	37	0	0	.	.	0
AUSTRIA	1897	6283	6237	46	0	0	.	.	0
AUSTRIA	1898	6674	6631	44	0	0	.	.	0
AUSTRIA	1899	6773	6718	55	0	0	.	.	0
AUSTRIA	1900	7553	7559	-6	0	0	.	.	0
AUSTRIA	1901	7741	7738	3	0	0	.	.	0
AUSTRIA	1902	7002	7013	-11	0	0	.	.	0
AUSTRIA	1903	6973	7014	-41	0	0	.	.	0
AUSTRIA	1904	7349	7426	-77	0	0	.	.	0
AUSTRIA	1905	7671	7808	-137	0	0	.	.	0
AUSTRIA	1906	9153	9328	-175	0	0	.	.	0
AUSTRIA	1907	11495	11653	-158	0	0	.	.	0
AUSTRIA	1908	16087	16384	-297	0	0	.	.	0
AUSTRIA	1909	11509	11911	-402	0	0	.	.	0
AUSTRIA	1910	15698	16044	-346	0	0	.	.	0
AUSTRIA	1911	13111	13412	-301	0	0	.	.	0
AUSTRIA	1912	13630	14107	-477	0	0	.	.	0
AUSTRIA	1913	16274	16644	-370	0	0	.	.	0
AUSTRIA	1914	13328	13552	-224	0	0	.	.	0
AUSTRIA	1915	9525	9646	-121	0	0	.	.	0
AUSTRIA	1916	2192	2480	-288	0	0	.	.	0
AUSTRIA	1917	942	942	0	0	0	.	.	0
AUSTRIA	1918	911	911	0	0	0	.	.	0
AUSTRIA	1919	823	823	0	0	0	.	.	0
AUSTRIA	1920	3965	3898	67	0	0	.	.	0
AUSTRIA	1921	5278	5198	80	0	0	.	.	0
AUSTRIA	1922	5073	4985	87	0	0	.	.	0
AUSTRIA	1923	4852	4765	87	0	0	.	.	0
AUSTRIA	1924	5484	5350	134	0	0	.	.	0
AUSTRIA	1925	5183	5064	119	0	0	.	.	0
AUSTRIA	1926	5082	4941	141	0	0	.	.	0
AUSTRIA	1927	5492	5339	153	0	0	.	.	0
AUSTRIA	1928	5784	5513	199	0	71	.	.	0
AUSTRIA	1929	6598	6302	218	0	79	.	.	0
AUSTRIA	1930	5149	4804	263	0	82	.	.	0
AUSTRIA	1931	4941	4639	261	0	41	.	.	0
AUSTRIA	1932	4141	3871	215	7	48	.	.	0
AUSTRIA	1933	3884	3572	275	0	38	.	.	0
AUSTRIA	1934	3754	3492	220	0	42	.	.	0
AUSTRIA	1935	3800	3506	244	0	50	.	.	0
AUSTRIA	1936	3710	3407	253	0	50	.	.	0
AUSTRIA	1937	4165	3865	241	0	58	.	.	0
AUSTRIA	1938	1580	1443	48	0	88	.	.	0
AUSTRIA	1939	1730	1509	121	0	101	.	.	0
AUSTRIA	1940	2005	1548	346	0	111	.	.	0
AUSTRIA	1941	2177	1517	546	0	115	.	.	0
AUSTRIA	1942	2333	1511	729	0	93	.	.	0
AUSTRIA	1943	2624	1595	924	0	105	.	.	0
AUSTRIA	1944	2563	1547	1016	0	0	.	.	0
AUSTRIA	1945	1245	851	373	22	0	.	.	0
AUSTRIA	1946	3483	2700	707	22	53	.	.	0
AUSTRIA	1947	4812	3974	774	26	38	.	.	0
AUSTRIA	1948	6684	5640	829	116	98	.	.	0
AUSTRIA	1949	7254	6070	1009	26	148	.	.	0
AUSTRIA	1950	5704	4744	532	253	175	0	0.82	0
AUSTRIA	1951	6351	5145	744	260	201	0	0.92	0
AUSTRIA	1952	6025	4747	826	263	189	0	0.87	0
AUSTRIA	1953	5928	4564	875	299	190	0	0.86	0
AUSTRIA	1954	6690	4992	1141	336	221	0	0.96	0
AUSTRIA	1955	7936	5240	2031	412	253	0	1.14	0
AUSTRIA	1956	7700	5453	1583	400	263	0	1.11	5
AUSTRIA	1957	7966	5603	1664	409	290	0	1.14	5
AUSTRIA	1958	7668	5075	1857	443	293	0	1.1	6
AUSTRIA	1959	7620	4718	1964	609	329	0	1.09	1
AUSTRIA	1960	8405	4926	2297	797	385	0	1.19	1
AUSTRIA	1961	8689	4820	2607	843	419	0	1.23	2
AUSTRIA	1962	9246	4936	3009	884	416	0	1.3	1
AUSTRIA	1963	10088	5349	3367	922	450	0	1.41	1
AUSTRIA	1964	10620	5168	3977	961	513	0	1.47	2
AUSTRIA	1965	10414	4903	4027	934	550	0	1.43	2
AUSTRIA	1966	10706	4597	4494	1002	612	0	1.46	3
AUSTRIA	1967	10899	4299	5022	960	618	0	1.48	3
AUSTRIA	1968	11549	4199	5708	1022	619	0	1.56	3
AUSTRIA	1969	12188	4183	6109	1275	620	0	1.64	3
AUSTRIA	1970	13824	4858	6763	1548	654	0	1.85	45
AUSTRIA	1971	14223	4107	7580	1790	747	0	1.9	46
AUSTRIA	1972	15324	4267	8261	1933	863	0	2.04	46
AUSTRIA	1973	16407	4327	9149	2080	851	0	2.17	47
AUSTRIA	1974	15672	4532	8007	2258	875	0	2.07	39
AUSTRIA	1975	14833	3975	7879	2213	766	0	1.96	36
AUSTRIA	1976	15930	3894	8707	2528	800	0	2.1	44
AUSTRIA	1977	15331	3423	8572	2570	766	0	2.02	45
AUSTRIA	1978	15676	3503	8697	2675	800	0	2.07	50
AUSTRIA	1979	16797	3940	9430	2664	763	0	2.22	51
AUSTRIA	1980	14264	3873	7116	2534	742	0	1.89	57
AUSTRIA	1981	15307	3996	8185	2407	719	0	2.03	64
AUSTRIA	1982	14690	3856	7820	2332	682	0	1.95	56
AUSTRIA	1983	14176	3929	7210	2370	667	0	1.88	65
AUSTRIA	1984	14876	4600	6958	2653	666	0	1.97	79
AUSTRIA	1985	14917	4546	6912	2839	620	0	1.97	86
AUSTRIA	1986	14748	4019	7584	2524	621	0	1.95	86
AUSTRIA	1987	15747	4039	8464	2629	615	0	2.08	91
AUSTRIA	1988	14546	3899	7480	2519	648	0	1.91	115
AUSTRIA	1989	14758	3779	7591	2743	646	0	1.93	146
AUSTRIA	1990	16624	4510	8450	2998	666	0	2.17	135
AUSTRIA	1991	17968	4508	9432	3345	682	0	2.33	157
AUSTRIA	1992	16507	3517	8992	3314	684	0	2.12	168
AUSTRIA	1993	15875	3136	8557	3510	672	0	2.02	164
AUSTRIA	1994	15704	3190	8246	3611	657	0	1.99	173
AUSTRIA	1995	16532	3649	8445	3915	523	0	2.08	192
AUSTRIA	1996	16650	3571	8356	4197	527	0	2.09	212
AUSTRIA	1997	16733	3801	8324	4084	524	0	2.1	424
AUSTRIA	1998	17330	3370	9242	4193	524	0	2.17	438
AUSTRIA	1999	16841	3352	8704	4266	519	0	2.11	418
AUSTRIA	2000	16850	3783	8482	4071	514	0	2.11	459
AUSTRIA	2001	17354	3910	8612	4315	517	0	2.16	442
AUSTRIA	2002	17758	3946	8915	4364	533	0	2.2	414
AUSTRIA	2003	19721	4290	10185	4718	528	0	2.42	355
AUSTRIA	2004	19667	4205	10111	4759	592	0	2.4	416
AUSTRIA	2005	20285	4245	10302	5118	620	0	2.46	469
AUSTRIA	2006	19669	4260	10091	4658	660	0	2.38	492
AUSTRIA	2007	18764	3987	9710	4359	708	0	2.26	472
AUSTRIA	2008	18469	3765	9315	4667	722	0	2.22	500
AZERBAIJAN	1990
AZERBAIJAN	1991
AZERBAIJAN	1992	12046	20	5229	6168	109	520	1.62	378
AZERBAIJAN	1993	11804	3	7002	4717	82	0	1.56	203
AZERBAIJAN	1994	11558	1	6943	4550	64	0	1.5	266
AZERBAIJAN	1995	9159	4	5496	3632	27	0	1.18	355
AZERBAIJAN	1996	8608	4	5370	3203	30	0	1.09	191
AZERBAIJAN	1997	8172	4	5106	3019	43	0	1.03	154
AZERBAIJAN	1998	8616	1	5696	2893	27	0	1.08	155
AZERBAIJAN	1999	7990	0	4777	3190	24	0	0.99	142
AZERBAIJAN	2000	8330	0	5186	3117	27	0	1.03	100
AZERBAIJAN	2001	8028	0	3260	4524	71	173	0.98	184
AZERBAIJAN	2002	8183	0	3187	4536	115	344	0.99	225
AZERBAIJAN	2003	8498	0	3615	4654	138	91	1.02	273
AZERBAIJAN	2004	8798	0	3521	5083	194	0	1.05	274
AZERBAIJAN	2005	9406	0	4038	5058	209	102	1.11	331
AZERBAIJAN	2006	10722	0	3582	5586	221	1333	1.26	348
AZERBAIJAN	2007	11518	0	3305	4806	235	3171	1.33	326
AZERBAIJAN	2008	12855	0	3213	5672	245	3726	1.47	367
BAHAMAS	1950	15	0	15	0	0	0	0.19	3
BAHAMAS	1951	18	0	18	0	0	0	0.22	3
BAHAMAS	1952	21	0	21	0	0	0	0.26	3
BAHAMAS	1953	22	0	22	0	0	0	0.26	3
BAHAMAS	1954	23	0	23	0	0	0	0.26	3
BAHAMAS	1955	35	0	35	0	0	0	0.4	2
BAHAMAS	1956	38	0	38	0	0	0	0.41	2
BAHAMAS	1957	48	0	48	0	0	0	0.5	2
BAHAMAS	1958	49	0	49	0	0	0	0.49	2
BAHAMAS	1959	71	0	71	0	0	0	0.68	18
BAHAMAS	1960	112	0	112	0	0	0	1.02	468
BAHAMAS	1961	149	0	149	0	0	0	1.29	1122
BAHAMAS	1962	198	0	198	0	0	0	1.63	1135
BAHAMAS	1963	193	0	193	0	0	0	1.52	1039
BAHAMAS	1964	296	0	296	0	0	0	2.21	1085
BAHAMAS	1965	359	0	359	0	0	0	2.56	950
BAHAMAS	1966	298	0	298	0	0	0	2.03	519
BAHAMAS	1967	465	0	372	0	93	0	3.04	235
BAHAMAS	1968	445	0	352	0	93	0	2.8	199
BAHAMAS	1969	476	0	365	0	111	0	2.89	227
BAHAMAS	1970	702	0	589	0	113	0	4.14	265
BAHAMAS	1971	1836	1	1722	0	113	0	10.54	472
BAHAMAS	1972	1770	0	1636	0	134	0	9.94	472
BAHAMAS	1973	2147	4	2013	0	130	0	11.82	586
BAHAMAS	1974	2015	3	1904	0	108	0	10.88	514
BAHAMAS	1975	2251	0	2199	0	52	0	11.92	456
BAHAMAS	1976	1763	0	1726	0	37	0	9.14	792
BAHAMAS	1977	2650	0	2640	0	10	0	13.46	711
BAHAMAS	1978	1802	0	1757	0	45	0	8.96	669
BAHAMAS	1979	1890	0	1829	0	61	0	9.19	562
BAHAMAS	1980	2179	0	2115	0	64	0	10.37	673
BAHAMAS	1981	764	18	742	0	4	0	3.56	661
BAHAMAS	1982	617	10	598	0	9	0	2.81	616
BAHAMAS	1983	550	0	547	0	3	0	2.45	582
BAHAMAS	1984	506	0	506	0	0	0	2.21	354
BAHAMAS	1985	412	0	412	0	0	0	1.76	470
BAHAMAS	1986	385	0	385	0	0	0	1.62	351
BAHAMAS	1987	388	0	388	0	0	0	1.6	287
BAHAMAS	1988	420	0	420	0	0	0	1.7	223
BAHAMAS	1989	531	1	530	0	0	0	2.12	193
BAHAMAS	1990	532	1	531	0	0	0	2.08	193
BAHAMAS	1991	486	1	485	0	0	0	1.87	193
BAHAMAS	1992	489	1	487	0	0	0	1.84	189
BAHAMAS	1993	468	1	466	0	0	0	1.73	191
BAHAMAS	1994	469	1	468	0	0	0	1.7	188
BAHAMAS	1995	472	1	471	0	0	0	1.68	190
BAHAMAS	1996	472	1	471	0	0	0	1.65	192
BAHAMAS	1997	475	1	474	0	0	0	1.63	188
BAHAMAS	1998	489	1	488	0	0	0	1.65	188
BAHAMAS	1999	490	1	488	0	0	0	1.63	188
BAHAMAS	2000	490	1	489	0	0	0	1.61	189
BAHAMAS	2001	490	1	489	0	0	0	1.59	188
BAHAMAS	2002	568	1	567	0	0	0	1.81	228
BAHAMAS	2003	510	2	508	0	0	0	1.61	245
BAHAMAS	2004	548	2	546	0	0	0	1.7	255
BAHAMAS	2005	575	2	573	0	0	0	1.77	267
BAHAMAS	2006	583	3	580	0	0	0	1.77	266
BAHAMAS	2007	586	3	583	0	0	0	1.76	268
BAHAMAS	2008	588	3	585	0	0	0	1.74	269
BAHRAIN	1933	3	0	3	0	0	.	.	0
BAHRAIN	1934	33	0	33	0	0	.	.	0
BAHRAIN	1935	145	0	145	0	0	.	.	0
BAHRAIN	1936	532	0	532	0	0	.	.	0
BAHRAIN	1937	888	0	888	0	0	.	.	0
BAHRAIN	1938	949	0	949	0	0	.	.	0
BAHRAIN	1939	869	0	869	0	0	.	.	0
BAHRAIN	1940	810	0	810	0	0	.	.	0
BAHRAIN	1941	778	0	778	0	0	.	.	0
BAHRAIN	1942	714	0	714	0	0	.	.	0
BAHRAIN	1943	753	0	753	0	0	.	.	0
BAHRAIN	1944	769	0	769	0	0	.	.	0
BAHRAIN	1945	836	0	836	0	0	.	.	0
BAHRAIN	1946	917	0	917	0	0	.	.	0
BAHRAIN	1947	1078	0	1078	0	0	.	.	0
BAHRAIN	1948	1249	0	1249	0	0	.	.	0
BAHRAIN	1949	1258	0	1258	0	0	.	.	0
BAHRAIN	1950	377	0	377	0	0	0	3.26	554
BAHRAIN	1951	321	0	321	0	0	0	2.72	551
BAHRAIN	1952	351	0	351	0	0	0	2.89	517
BAHRAIN	1953	272	0	272	0	0	0	2.17	597
BAHRAIN	1954	285	0	285	0	0	0	2.2	575
BAHRAIN	1955	383	0	383	0	0	0	2.87	587
BAHRAIN	1956	288	0	288	0	0	0	2.09	593
BAHRAIN	1957	206	0	206	0	0	0	1.45	669
BAHRAIN	1958	352	0	352	0	0	0	2.41	595
BAHRAIN	1959	358	0	358	0	0	0	2.38	595
BAHRAIN	1960	157	0	157	0	0	0	1	605
BAHRAIN	1961	483	0	483	0	0	0	2.97	616
BAHRAIN	1962	434	0	434	0	0	0	2.56	699
BAHRAIN	1963	326	0	300	26	0	0	1.84	751
BAHRAIN	1964	436	0	409	26	0	0	2.36	887
BAHRAIN	1965	335	0	309	26	0	0	1.75	882
BAHRAIN	1966	177	0	146	31	0	0	0.9	982
BAHRAIN	1967	274	0	243	31	0	0	1.36	1074
BAHRAIN	1968	301	0	160	141	0	0	1.46	1000
BAHRAIN	1969	347	0	185	162	0	0	1.63	826
BAHRAIN	1970	707	0	523	183	0	0	3.22	882
BAHRAIN	1971	829	10	552	267	0	0	3.64	906
BAHRAIN	1972	1004	0	412	592	0	0	4.24	826
BAHRAIN	1973	1506	10	657	839	0	0	6.09	869
BAHRAIN	1974	1474	0	440	1035	0	0	5.69	657
BAHRAIN	1975	1569	0	480	1089	0	0	5.77	538
BAHRAIN	1976	1793	0	652	1141	0	0	6.27	526
BAHRAIN	1977	2037	0	798	1239	0	0	6.77	393
BAHRAIN	1978	2118	0	758	1361	0	0	6.69	251
BAHRAIN	1979	2218	22	725	1472	0	0	6.68	126
BAHRAIN	1980	2151	0	624	1527	0	0	6.2	159
BAHRAIN	1981	2325	0	784	1541	0	0	6.44	308
BAHRAIN	1982	2683	0	988	1695	0	0	7.17	144
BAHRAIN	1983	2244	0	454	1790	0	0	5.8	0
BAHRAIN	1984	2511	0	653	1858	0	0	6.28	0
BAHRAIN	1985	2780	0	531	2249	0	0	6.72	0
BAHRAIN	1986	3003	0	444	2559	0	0	7.01	0
BAHRAIN	1987	3117	0	665	2453	0	0	7.03	0
BAHRAIN	1988	3317	0	676	2619	21	0	7.22	0
BAHRAIN	1989	3201	0	450	2730	21	0	6.72	0
BAHRAIN	1990	3241	0	368	2853	20	0	6.57	0
BAHRAIN	1991	3137	0	404	2712	20	0	6.15	0
BAHRAIN	1992	2888	0	146	2712	30	0	5.48	0
BAHRAIN	1993	4129	0	684	3414	31	0	7.58	0
BAHRAIN	1994	4160	0	785	3344	31	0	7.41	0
BAHRAIN	1995	4369	0	781	3560	27	0	7.56	0
BAHRAIN	1996	4260	0	563	3672	26	0	7.18	287
BAHRAIN	1997	4723	0	744	3955	23	0	7.78	205
BAHRAIN	1998	5019	0	819	4169	31	0	8.08	296
BAHRAIN	1999	4914	0	573	4320	21	0	7.73	283
BAHRAIN	2000	5084	0	666	4406	12	0	7.82	303
BAHRAIN	2001	3798	0	524	3261	12	0	5.71	292
BAHRAIN	2002	4281	0	838	3434	9	0	6.29	353
BAHRAIN	2003	4491	0	932	3541	18	0	6.45	395
BAHRAIN	2004	4711	0	974	3683	54	0	6.62	432
BAHRAIN	2005	5071	0	1115	3901	54	0	6.97	467
BAHRAIN	2006	5505	0	1317	4134	54	0	7.4	478
BAHRAIN	2007	5858	0	1253	4550	54	0	7.71	502
BAHRAIN	2008	6130	0	1216	4864	50	0	7.9	498
BANGLADESH	1972	957	97	662	195	3	0	0.01	23
BANGLADESH	1973	1242	126	800	312	4	0	0.02	31
BANGLADESH	1974	1271	112	769	377	12	0	0.02	19
BANGLADESH	1975	1328	129	913	263	23	0	0.02	21
BANGLADESH	1976	1519	122	990	385	21	0	0.02	19
BANGLADESH	1977	1585	137	975	431	42	0	0.02	25
BANGLADESH	1978	1641	115	1023	457	46	0	0.02	33
BANGLADESH	1979	1813	98	1148	523	44	0	0.02	26
BANGLADESH	1980	2083	122	1311	605	46	0	0.02	51
BANGLADESH	1981	2163	127	1323	666	47	0	0.02	66
BANGLADESH	1982	2345	155	1283	864	44	0	0.02	39
BANGLADESH	1983	2246	83	1160	961	42	0	0.02	21
BANGLADESH	1984	2488	32	1200	1219	37	0	0.02	33
BANGLADESH	1985	2791	51	1320	1388	33	0	0.03	22
BANGLADESH	1986	3126	77	1444	1565	40	0	0.03	15
BANGLADESH	1987	3235	121	1454	1618	42	0	0.03	13
BANGLADESH	1988	3694	104	1638	1910	42	0	0.03	13
BANGLADESH	1989	3669	28	1574	2024	43	0	0.03	13
BANGLADESH	1990	4236	292	1830	2068	46	0	0.04	9
BANGLADESH	1991	4347	93	1745	2472	37	0	0.04	4
BANGLADESH	1992	4840	88	2093	2622	37	0	0.04	0
BANGLADESH	1993	4747	33	1841	2836	37	0	0.04	0
BANGLADESH	1994	5173	27	1977	3131	38	0	0.04	0
BANGLADESH	1995	6222	333	2296	3556	38	0	0.05	41
BANGLADESH	1996	6553	185	2596	3684	88	0	0.05	43
BANGLADESH	1997	6835	335	2743	3620	138	0	0.05	38
BANGLADESH	1998	6556	96	2381	3909	169	0	0.05	150
BANGLADESH	1999	6881	48	2287	4262	284	0	0.05	154
BANGLADESH	2000	7599	342	2163	4607	487	0	0.05	133
BANGLADESH	2001	8849	363	2647	5159	681	0	0.06	198
BANGLADESH	2002	9190	363	2720	5428	680	0	0.06	204
BANGLADESH	2003	9224	12	2693	5838	680	0	0.06	225
BANGLADESH	2004	10836	34	3842	6280	680	0	0.07	232
BANGLADESH	2005	10268	45	2778	6751	694	0	0.07	262
BANGLADESH	2006	12720	157	4577	7292	694	0	0.08	258
BANGLADESH	2007	12798	201	4113	7791	694	0	0.08	233
BANGLADESH	2008	12688	350	2863	8796	680	0	0.08	207
BARBADOS	1928	1	0	1	0	0	.	.	0
BARBADOS	1929	1	0	1	0	0	.	.	0
BARBADOS	1930	2	0	2	0	0	.	.	0
BARBADOS	1931	1	0	1	0	0	.	.	0
BARBADOS	1932	1	0	1	0	0	.	.	0
BARBADOS	1933	1	0	1	0	0	.	.	0
BARBADOS	1934	1	0	1	0	0	.	.	0
BARBADOS	1935	0	0	0	0	0	.	.	0
BARBADOS	1936	0	0	0	0	0	.	.	0
BARBADOS	1937	0	0	0	0	0	.	.	0
BARBADOS	1938	0	0	0	0	0	.	.	0
BARBADOS	1939	1	0	1	0	0	.	.	0
BARBADOS	1940	0	0	0	0	0	.	.	0
BARBADOS	1941	0	0	0	0	0	.	.	0
BARBADOS	1942	0	0	0	0	0	.	.	0
BARBADOS	1943	0	0	0	0	0	.	.	0
BARBADOS	1944	0	0	0	0	0	.	.	0
BARBADOS	1945	0	0	0	0	0	.	.	0
BARBADOS	1946	0	0	0	0	0	.	.	0
BARBADOS	1947	1	0	0	1	0	.	.	0
BARBADOS	1948	1	0	0	1	0	.	.	0
BARBADOS	1949	1	0	0	1	0	.	.	0
BARBADOS	1950	20	1	18	1	0	0	0.1	0
BARBADOS	1951	30	1	27	2	0	0	0.14	0
BARBADOS	1952	24	1	21	2	0	0	0.11	0
BARBADOS	1953	30	1	27	2	0	0	0.13	0
BARBADOS	1954	31	1	28	2	0	0	0.14	1
BARBADOS	1955	35	1	32	2	0	0	0.15	1
BARBADOS	1956	35	1	32	2	0	0	0.15	1
BARBADOS	1957	37	1	35	2	0	0	0.16	2
BARBADOS	1958	41	1	39	2	0	0	0.18	2
BARBADOS	1959	41	1	39	2	0	0	0.18	3
BARBADOS	1960	47	1	45	1	0	0	0.2	3
BARBADOS	1961	53	1	51	2	0	0	0.23	6
BARBADOS	1962	71	1	69	2	0	0	0.31	168
BARBADOS	1963	52	0	50	2	0	0	0.22	236
BARBADOS	1964	49	0	48	2	0	0	0.21	206
BARBADOS	1965	56	0	54	2	0	0	0.24	250
BARBADOS	1966	73	1	70	2	0	0	0.31	269
BARBADOS	1967	92	1	90	2	0	0	0.39	223
BARBADOS	1968	120	0	119	2	0	0	0.51	253
BARBADOS	1969	131	0	130	2	0	0	0.55	145
BARBADOS	1970	117	0	116	2	0	0	0.49	127
BARBADOS	1971	132	0	131	2	0	0	0.55	171
BARBADOS	1972	137	0	136	1	0	0	0.57	151
BARBADOS	1973	131	0	129	2	0	0	0.54	116
BARBADOS	1974	134	0	133	1	0	0	0.55	229
BARBADOS	1975	155	0	154	1	0	0	0.63	113
BARBADOS	1976	145	0	142	2	0	0	0.59	95
BARBADOS	1977	161	0	158	2	0	0	0.65	96
BARBADOS	1978	172	0	167	5	0	0	0.69	162
BARBADOS	1979	164	0	157	6	0	0	0.66	148
BARBADOS	1980	184	0	177	7	0	0	0.74	169
BARBADOS	1981	187	0	183	4	0	0	0.75	138
BARBADOS	1982	176	0	172	5	0	0	0.7	122
BARBADOS	1983	187	0	182	6	0	0	0.74	131
BARBADOS	1984	204	0	173	10	20	0	0.8	131
BARBADOS	1985	231	0	188	13	30	0	0.91	114
BARBADOS	1986	250	0	209	14	27	0	0.98	86
BARBADOS	1987	257	0	218	12	28	0	1	105
BARBADOS	1988	258	0	219	14	25	0	1	102
BARBADOS	1989	270	0	226	15	29	0	1.04	102
BARBADOS	1990	293	0	251	15	27	0	1.13	92
BARBADOS	1991	329	0	290	12	27	0	1.26	92
BARBADOS	1992	267	0	232	11	24	0	1.03	76
BARBADOS	1993	304	0	282	14	8	0	1.17	69
BARBADOS	1994	204	0	182	12	11	0	0.79	95
BARBADOS	1995	226	0	202	14	10	0	0.87	102
BARBADOS	1996	232	0	202	15	15	0	0.9	113
BARBADOS	1997	246	0	209	12	24	0	0.96	148
BARBADOS	1998	311	0	257	19	35	0	1.23	136
BARBADOS	1999	330	0	271	25	34	0	1.31	140
BARBADOS	2000	324	0	268	20	36	0	1.29	172
BARBADOS	2001	333	0	282	17	34	0	1.33	0
BARBADOS	2002	335	0	279	15	41	0	1.33	0
BARBADOS	2003	346	0	290	13	44	0	1.37	0
BARBADOS	2004	353	0	296	13	44	0	1.4	0
BARBADOS	2005	369	0	309	14	46	0	1.46	0
BARBADOS	2006	374	0	314	14	46	0	1.47	0
BARBADOS	2007	368	0	314	14	40	0	1.45	0
BARBADOS	2008	369	0	314	14	41	0	1.45	0
BELARUS	1990
BELARUS	1991
BELARUS	1992	23858	2149	12862	8534	313	0	2.32	0
BELARUS	1993	20303	1864	10258	7923	258	0	1.97	0
BELARUS	1994	17975	1617	8553	7603	202	0	1.75	0
BELARUS	1995	16940	1443	8152	7177	168	0	1.65	0
BELARUS	1996	16405	1374	7266	7564	200	0	1.6	0
BELARUS	1997	16231	1129	6242	8606	255	0	1.59	0
BELARUS	1998	15707	1108	5881	8441	277	0	1.55	0
BELARUS	1999	15222	882	5329	8725	286	0	1.51	0
BELARUS	2000	14581	955	4469	8906	251	0	1.45	0
BELARUS	2001	14343	799	4272	9027	245	0	1.43	0
BELARUS	2002	14287	715	4087	9191	295	0	1.43	0
BELARUS	2003	14650	690	4057	9566	336	0	1.48	0
BELARUS	2004	15877	594	4530	10382	371	0	1.61	0
BELARUS	2005	16101	585	4508	10582	426	0	1.64	0
BELARUS	2006	16855	555	5050	10775	475	0	1.73	0
BELARUS	2007	16432	529	4545	10838	520	0	1.69	0
BELARUS	2008	17130	476	5029	11051	574	0	1.77	0
BELGIUM	1802	1746	1746	0	0	0	.	.	0
BELGIUM	1830	1691	1691	0	0	0	.	.	0
BELGIUM	1831	1218	1218	0	0	0	.	.	0
BELGIUM	1832	1287	1287	0	0	0	.	.	0
BELGIUM	1833	1246	1246	0	0	0	.	.	0
BELGIUM	1834	1203	1203	0	0	0	.	.	0
BELGIUM	1835	1299	1299	0	0	0	.	.	0
BELGIUM	1836	1528	1528	0	0	0	.	.	0
BELGIUM	1837	1637	1637	0	0	0	.	.	0
BELGIUM	1838	1671	1671	0	0	0	.	.	0
BELGIUM	1839	1831	1831	0	0	0	.	.	0
BELGIUM	1840	2109	2109	0	0	0	.	.	0
BELGIUM	1841	2017	2017	0	0	0	.	.	0
BELGIUM	1842	2096	2096	0	0	0	.	.	0
BELGIUM	1843	1941	1941	0	0	0	.	.	0
BELGIUM	1844	2129	2129	0	0	0	.	.	0
BELGIUM	1845	2243	2243	0	0	0	.	.	0
BELGIUM	1846	2447	2447	0	0	0	.	.	0
BELGIUM	1847	2543	2543	0	0	0	.	.	0
BELGIUM	1848	2261	2261	0	0	0	.	.	0
BELGIUM	1849	2384	2384	0	0	0	.	.	0
BELGIUM	1850	2547	2547	0	0	0	.	.	0
BELGIUM	1851	2775	2775	0	0	0	.	.	0
BELGIUM	1852	3114	3114	0	0	0	.	.	0
BELGIUM	1853	3217	3217	0	0	0	.	.	0
BELGIUM	1854	3564	3564	0	0	0	.	.	0
BELGIUM	1855	3651	3651	0	0	0	.	.	0
BELGIUM	1856	3606	3606	0	0	0	.	.	0
BELGIUM	1857	3754	3754	0	0	0	.	.	0
BELGIUM	1858	3944	3944	0	0	0	.	.	0
BELGIUM	1859	4066	4066	0	0	0	.	.	0
BELGIUM	1860	4152	4152	0	0	0	.	.	0
BELGIUM	1861	4492	4492	0	0	0	.	.	0
BELGIUM	1862	4461	4461	0	0	0	.	.	0
BELGIUM	1863	4702	4702	0	0	0	.	.	0
BELGIUM	1864	4935	4935	0	0	0	.	.	0
BELGIUM	1865	5202	5202	0	0	0	.	.	0
BELGIUM	1866	5603	5603	0	0	0	.	.	0
BELGIUM	1867	6068	6068	0	0	0	.	.	0
BELGIUM	1868	5486	5486	0	0	0	.	.	0
BELGIUM	1869	5909	5909	0	0	0	.	.	0
BELGIUM	1870	6754	6754	0	0	0	.	.	0
BELGIUM	1871	6473	6473	0	0	0	.	.	0
BELGIUM	1872	6984	6984	0	0	0	.	.	0
BELGIUM	1873	7671	7671	0	0	0	.	.	0
BELGIUM	1874	7073	7073	0	0	0	.	.	0
BELGIUM	1875	7350	7350	0	0	0	.	.	0
BELGIUM	1876	7183	7183	0	0	0	.	.	0
BELGIUM	1877	6837	6837	0	0	0	.	.	0
BELGIUM	1878	7434	7434	0	0	0	.	.	0
BELGIUM	1879	7569	7569	0	0	0	.	.	0
BELGIUM	1880	8304	8304	0	0	0	.	.	0
BELGIUM	1881	8360	8360	0	0	0	.	.	0
BELGIUM	1882	8853	8853	0	0	0	.	.	0
BELGIUM	1883	9384	9384	0	0	0	.	.	0
BELGIUM	1884	9244	9244	0	0	0	.	.	0
BELGIUM	1885	9029	9029	0	0	0	.	.	0
BELGIUM	1886	8762	8762	0	0	0	.	.	0
BELGIUM	1887	9271	9271	0	0	0	.	.	0
BELGIUM	1888	9840	9840	0	0	0	.	.	0
BELGIUM	1889	10053	10053	0	0	0	.	.	0
BELGIUM	1890	10869	10869	0	0	0	.	.	0
BELGIUM	1891	10311	10311	0	0	0	.	.	0
BELGIUM	1892	10297	10297	0	0	0	.	.	0
BELGIUM	1893	9846	9846	0	0	0	.	.	0
BELGIUM	1894	10871	10871	0	0	0	.	.	0
BELGIUM	1895	10953	10953	0	0	0	.	.	0
BELGIUM	1896	11539	11539	0	0	0	.	.	0
BELGIUM	1897	11939	11939	0	0	0	.	.	0
BELGIUM	1898	12305	12305	0	0	0	.	.	0
BELGIUM	1899	12862	12862	0	0	0	.	.	0
BELGIUM	1900	13555	13555	0	0	0	.	.	0
BELGIUM	1901	12748	12748	0	0	0	.	.	0
BELGIUM	1902	13334	13334	0	0	0	.	.	0
BELGIUM	1903	14364	14364	0	0	0	.	.	0
BELGIUM	1904	13742	13742	0	0	0	.	.	0
BELGIUM	1905	13719	13719	0	0	0	.	.	0
BELGIUM	1906	15692	15692	0	0	0	.	.	0
BELGIUM	1907	15918	15918	0	0	0	.	.	0
BELGIUM	1908	15788	15788	0	0	0	.	.	0
BELGIUM	1909	15765	15765	0	0	0	.	.	0
BELGIUM	1910	16727	16727	0	0	0	.	.	0
BELGIUM	1911	16836	16836	0	0	0	.	.	0
BELGIUM	1912	17679	17679	0	0	0	.	.	0
BELGIUM	1913	18563	18237	326	0	0	.	.	0
BELGIUM	1914	11074	11074	0	0	0	.	.	0
BELGIUM	1915	9394	9394	0	0	0	.	.	0
BELGIUM	1916	12498	12498	0	0	0	.	.	0
BELGIUM	1917	9893	9893	0	0	0	.	.	0
BELGIUM	1918	9204	9204	0	0	0	.	.	0
BELGIUM	1919	12246	12246	0	0	0	.	.	0
BELGIUM	1920	15053	15053	0	0	0	.	.	0
BELGIUM	1921	13792	13792	0	0	0	.	.	0
BELGIUM	1922	15259	15085	174	0	0	.	.	0
BELGIUM	1923	19619	19361	258	0	0	.	.	0
BELGIUM	1924	20812	20512	300	0	0	.	.	0
BELGIUM	1925	21299	20980	319	0	0	.	.	0
BELGIUM	1926	21202	20885	316	0	0	.	.	0
BELGIUM	1927	24693	24386	306	0	0	.	.	0
BELGIUM	1928	24088	23144	529	0	414	.	.	0
BELGIUM	1929	26465	25432	591	0	442	.	.	0
BELGIUM	1930	25569	24541	614	0	415	.	.	0
BELGIUM	1931	22962	21991	635	0	335	.	.	0
BELGIUM	1932	18483	17510	687	0	286	.	.	0
BELGIUM	1933	19832	18870	697	0	265	.	.	0
BELGIUM	1934	20460	19333	869	0	258	.	.	0
BELGIUM	1935	19555	18520	736	0	299	.	.	0
BELGIUM	1936	20473	19157	996	0	320	.	.	0
BELGIUM	1937	24648	23246	993	0	409	.	.	0
BELGIUM	1938	21258	20240	603	0	415	.	.	0
BELGIUM	1939	20120	19773	0	0	347	.	.	0
BELGIUM	1940	16950	16921	0	0	29	.	.	0
BELGIUM	1941	17791	17705	0	0	86	.	.	0
BELGIUM	1942	16670	16600	0	0	69	.	.	0
BELGIUM	1943	15790	15727	0	0	63	.	.	0
BELGIUM	1944	9045	8964	0	0	82	.	.	0
BELGIUM	1945	10578	10490	0	0	88	.	.	0
BELGIUM	1946	15398	15141	0	0	257	.	.	0
BELGIUM	1947	21741	20283	1103	0	355	.	.	0
BELGIUM	1948	22597	20903	1242	0	453	.	.	0
BELGIUM	1949	21640	19936	1306	0	398	.	.	0
BELGIUM	1950	20801	18612	1703	2	484	0	2.41	265
BELGIUM	1951	24418	21749	2063	8	598	0	2.82	435
BELGIUM	1952	22784	19929	2280	16	559	0	2.62	412
BELGIUM	1953	22487	19220	2619	19	629	0	2.57	364
BELGIUM	1954	23404	19904	2890	15	595	0	2.66	384
BELGIUM	1955	25119	20963	3498	21	638	0	2.83	493
BELGIUM	1956	26419	21873	3887	25	634	0	2.96	625
BELGIUM	1957	26339	21227	4442	29	640	0	2.93	494
BELGIUM	1958	23936	18219	5136	29	552	0	2.65	460
BELGIUM	1959	24107	18127	5351	25	604	0	2.65	585
BELGIUM	1960	24816	18533	5668	17	597	0	2.71	657
BELGIUM	1961	25305	18283	6356	19	647	0	2.75	901
BELGIUM	1962	26757	18707	7379	21	651	0	2.88	1139
BELGIUM	1963	28847	19455	8734	19	640	0	3.09	1313
BELGIUM	1964	28269	17746	9708	20	795	0	3.01	1559
BELGIUM	1965	28754	16877	11048	26	803	0	3.04	1758
BELGIUM	1966	28690	15882	11966	55	788	0	3.02	1816
BELGIUM	1967	29308	15522	12742	253	791	0	3.07	1773
BELGIUM	1968	32331	15957	14940	653	781	0	3.38	1916
BELGIUM	1969	33711	15253	16254	1352	853	0	3.51	2515
BELGIUM	1970	34257	13373	17830	2139	915	0	3.56	2628
BELGIUM	1971	33141	11028	18218	2952	943	0	3.43	2585
BELGIUM	1972	35679	11498	19505	3711	964	0	3.68	2862
BELGIUM	1973	37871	12347	20096	4471	958	0	3.89	3117
BELGIUM	1974	36875	13225	17406	5227	1016	0	3.78	2662
BELGIUM	1975	33297	10502	16768	5091	936	0	3.4	2704
BELGIUM	1976	35454	11262	17736	5435	1021	0	3.62	2615
BELGIUM	1977	34516	10598	17494	5369	1056	0	3.52	2670
BELGIUM	1978	37048	11913	18782	5323	1030	0	3.77	2704
BELGIUM	1979	38242	12856	18521	5817	1048	0	3.89	2457
BELGIUM	1980	36895	12869	17444	5565	1017	0	3.75	2444
BELGIUM	1981	33819	12610	15166	5133	910	0	3.44	2811
BELGIUM	1982	32057	12454	14505	4237	860	0	3.26	2547
BELGIUM	1983	27713	9996	12492	4447	778	0	2.82	2491
BELGIUM	1984	28747	11463	11919	4589	776	0	2.93	2503
BELGIUM	1985	28483	11104	12049	4577	753	0	2.9	2497
BELGIUM	1986	28052	9839	13750	3680	783	0	2.85	3004
BELGIUM	1987	28120	9949	13276	4120	774	0	2.86	3403
BELGIUM	1988	27367	9041	13383	4067	877	0	2.77	3815
BELGIUM	1989	29305	10935	12936	4519	914	0	2.96	4039
BELGIUM	1990	29580	11011	12524	5102	942	0	2.98	4417
BELGIUM	1991	32064	10470	15162	5455	977	0	3.22	4482
BELGIUM	1992	31190	9818	14621	5652	1098	0	3.12	4434
BELGIUM	1993	29704	8646	14148	5875	1035	0	2.96	4467
BELGIUM	1994	30899	9193	14520	6041	1144	0	3.07	4312
BELGIUM	1995	30809	8814	14250	6627	1118	0	3.06	4188
BELGIUM	1996	32622	8466	15707	7380	1069	0	3.23	4822
BELGIUM	1997	31714	8183	15400	7036	1095	0	3.13	5556
BELGIUM	1998	32502	8292	15467	7791	952	0	3.2	6055
BELGIUM	1999	31591	7252	15020	8329	990	0	3.11	5105
BELGIUM	2000	31555	8092	14141	8350	972	0	3.1	5970
BELGIUM	2001	31297	7333	14759	8232	973	0	3.06	5571
BELGIUM	2002	29324	6387	13632	8356	949	0	2.86	7082
BELGIUM	2003	31316	5994	15436	8995	891	0	3.04	7334
BELGIUM	2004	30347	5783	14551	9100	913	0	2.93	7999
BELGIUM	2005	29211	5092	14272	8815	1033	0	2.8	7866
BELGIUM	2006	29129	4836	13814	9365	1114	0	2.78	8337
BELGIUM	2007	27960	4287	13234	9324	1115	0	2.66	9078
BELGIUM	2008	28601	4364	13854	9268	1115	0	2.7	10203
BELIZE	1950	5	0	5	0	0	0	0.07	0
BELIZE	1951	7	0	7	0	0	0	0.09	0
BELIZE	1952	7	0	7	0	0	0	0.09	0
BELIZE	1953	8	0	8	0	0	0	0.1	0
BELIZE	1954	8	0	8	0	0	0	0.1	2
BELIZE	1955	8	0	8	0	0	0	0.1	0
BELIZE	1956	8	0	8	0	0	0	0.1	2
BELIZE	1957	8	0	8	0	0	0	0.09	1
BELIZE	1958	11	0	11	0	0	0	0.12	1
BELIZE	1959	11	0	11	0	0	0	0.12	1
BELIZE	1960	12	0	12	0	0	0	0.13	1
BELIZE	1961	10	0	10	0	0	0	0.11	0
BELIZE	1962	19	0	19	0	0	0	0.2	1
BELIZE	1963	17	0	17	0	0	0	0.17	1
BELIZE	1964	23	0	23	0	0	0	0.22	1
BELIZE	1965	23	0	23	0	0	0	0.21	1
BELIZE	1966	22	0	22	0	0	0	0.2	1
BELIZE	1967	33	0	33	0	0	0	0.29	1
BELIZE	1968	28	0	28	0	0	0	0.24	1
BELIZE	1969	37	0	37	0	0	0	0.31	4
BELIZE	1970	33	0	33	0	0	0	0.27	2
BELIZE	1971	39	0	39	0	0	0	0.31	3
BELIZE	1972	43	0	43	0	0	0	0.33	5
BELIZE	1973	40	0	40	0	0	0	0.31	7
BELIZE	1974	42	0	42	0	0	0	0.32	7
BELIZE	1975	48	0	48	0	0	0	0.36	6
BELIZE	1976	48	0	48	0	0	0	0.35	6
BELIZE	1977	54	0	54	0	0	0	0.39	8
BELIZE	1978	59	0	59	0	0	0	0.43	10
BELIZE	1979	57	0	57	0	0	0	0.4	9
BELIZE	1980	52	0	52	0	0	0	0.36	9
BELIZE	1981	50	0	50	0	0	0	0.34	8
BELIZE	1982	47	0	47	0	0	0	0.31	8
BELIZE	1983	47	0	47	0	0	0	0.3	9
BELIZE	1984	47	0	47	0	0	0	0.29	9
BELIZE	1985	52	0	52	0	0	0	0.31	2
BELIZE	1986	56	0	56	0	0	0	0.33	2
BELIZE	1987	62	0	62	0	0	0	0.36	4
BELIZE	1988	68	0	68	0	0	0	0.38	12
BELIZE	1989	82	0	82	0	0	0	0.44	14
BELIZE	1990	85	0	85	0	0	0	0.45	10
BELIZE	1991	98	0	98	0	0	0	0.5	13
BELIZE	1992	97	0	97	0	0	0	0.48	13
BELIZE	1993	103	0	103	0	0	0	0.5	9
BELIZE	1994	102	0	102	0	0	0	0.48	11
BELIZE	1995	103	0	103	0	0	0	0.47	8
BELIZE	1996	84	0	84	0	0	0	0.37	9
BELIZE	1997	106	0	106	0	0	0	0.46	12
BELIZE	1998	101	0	101	0	0	0	0.42	19
BELIZE	1999	164	0	164	0	0	0	0.67	18
BELIZE	2000	188	0	188	0	0	0	0.75	34
BELIZE	2001	194	0	194	0	0	0	0.75	24
BELIZE	2002	98	0	98	0	0	0	0.37	15
BELIZE	2003	102	0	102	0	0	0	0.38	17
BELIZE	2004	104	0	104	0	0	0	0.38	18
BELIZE	2005	108	0	108	0	0	0	0.38	19
BELIZE	2006	111	0	111	0	0	0	0.39	19
BELIZE	2007	116	0	116	0	0	0	0.4	14
BELIZE	2008	116	0	116	0	0	0	0.39	15
BENIN	1958	34	0	34	0	0	0	0.02	0
BENIN	1959	28	0	28	0	0	0	0.01	0
BENIN	1960	44	0	44	0	0	0	0.02	0
BENIN	1961	35	0	35	0	0	0	0.02	0
BENIN	1962	37	0	37	0	0	0	0.02	0
BENIN	1963	33	0	33	0	0	0	0.01	0
BENIN	1964	39	0	39	0	0	0	0.02	0
BENIN	1965	41	0	41	0	0	0	0.02	0
BENIN	1966	31	0	31	0	0	0	0.01	0
BENIN	1967	39	0	39	0	0	0	0.01	0
BENIN	1968	42	0	42	0	0	0	0.02	0
BENIN	1969	55	0	55	0	0	0	0.02	0
BENIN	1970	77	0	77	0	0	0	0.03	6
BENIN	1971	80	0	80	0	0	0	0.03	4
BENIN	1972	106	0	106	0	0	0	0.04	5
BENIN	1973	104	0	104	0	0	0	0.04	3
BENIN	1974	111	0	111	0	0	0	0.04	3
BENIN	1975	121	0	121	0	0	0	0.04	3
BENIN	1976	71	0	71	0	0	0	0.02	4
BENIN	1977	81	0	81	0	0	0	0.02	8
BENIN	1978	99	0	99	0	0	0	0.03	9
BENIN	1979	100	0	100	0	0	0	0.03	9
BENIN	1980	141	0	102	0	39	0	0.04	9
BENIN	1981	117	0	77	0	40	0	0.03	15
BENIN	1982	137	0	94	0	43	0	0.04	11
BENIN	1983	126	0	85	0	41	0	0.03	14
BENIN	1984	140	0	99	0	41	0	0.03	13
BENIN	1985	203	0	162	0	41	0	0.05	15
BENIN	1986	189	0	148	0	41	0	0.04	13
BENIN	1987	147	0	106	0	41	0	0.03	13
BENIN	1988	153	0	126	0	27	0	0.03	13
BENIN	1989	175	0	141	0	34	0	0.04	13
BENIN	1990	195	0	154	0	41	0	0.04	13
BENIN	1991	226	0	182	0	44	0	0.05	15
BENIN	1992	247	0	197	0	50	0	0.05	15
BENIN	1993	309	0	240	0	69	0	0.06	16
BENIN	1994	345	0	282	0	63	0	0.06	17
BENIN	1995	362	0	283	0	79	0	0.06	17
BENIN	1996	345	0	296	0	49	0	0.06	19
BENIN	1997	332	0	305	0	27	0	0.05	15
BENIN	1998	331	0	304	0	27	0	0.05	26
BENIN	1999	426	0	399	0	27	0	0.07	26
BENIN	2000	441	0	407	0	34	0	0.07	18
BENIN	2001	474	0	440	0	34	0	0.07	17
BENIN	2002	560	0	526	0	34	0	0.08	20
BENIN	2003	633	0	599	0	34	0	0.09	21
BENIN	2004	654	0	620	0	34	0	0.09	21
BENIN	2005	700	0	666	0	34	0	0.09	20
BENIN	2006	1017	0	814	0	203	0	0.13	21
BENIN	2007	1058	0	847	0	211	0	0.13	21
BENIN	2008	1109	0	891	0	218	0	0.13	22
BERMUDA	1950	12	1	11	0	0	0	0.31	21
BERMUDA	1951	16	1	15	0	0	0	0.42	30
BERMUDA	1952	29	2	27	0	0	0	0.75	38
BERMUDA	1953	25	1	23	0	0	0	0.64	39
BERMUDA	1954	23	1	23	0	0	0	0.59	47
BERMUDA	1955	30	1	29	0	0	0	0.74	73
BERMUDA	1956	37	1	36	0	0	0	0.9	92
BERMUDA	1957	38	1	37	0	0	0	0.89	106
BERMUDA	1958	40	1	39	0	0	0	0.93	105
BERMUDA	1959	37	0	37	0	0	0	0.84	110
BERMUDA	1960	43	0	43	0	0	0	0.95	127
BERMUDA	1961	48	0	48	0	0	0	1.05	142
BERMUDA	1962	43	0	43	0	0	0	0.92	146
BERMUDA	1963	41	0	41	0	0	0	0.87	121
BERMUDA	1964	55	0	55	0	0	0	1.15	113
BERMUDA	1965	49	0	49	0	0	0	0.99	96
BERMUDA	1966	55	0	55	0	0	0	1.12	98
BERMUDA	1967	58	0	58	0	0	0	1.15	99
BERMUDA	1968	61	0	61	0	0	0	1.21	112
BERMUDA	1969	54	0	54	0	0	0	1.05	122
BERMUDA	1970	62	0	62	0	0	0	1.2	117
BERMUDA	1971	63	0	63	0	0	0	1.2	200
BERMUDA	1972	69	0	69	0	0	0	1.32	112
BERMUDA	1973	116	0	116	0	0	0	2.18	55
BERMUDA	1974	121	0	121	0	0	0	2.26	30
BERMUDA	1975	125	1	124	0	0	0	2.31	36
BERMUDA	1976	128	0	128	0	0	0	2.34	35
BERMUDA	1977	124	0	124	0	0	0	2.25	39
BERMUDA	1978	116	0	116	0	0	0	2.1	47
BERMUDA	1979	126	0	126	0	0	0	2.27	47
BERMUDA	1980	119	0	119	0	0	0	2.12	38
BERMUDA	1981	106	0	106	0	0	0	1.89	32
BERMUDA	1982	108	0	108	0	0	0	1.9	28
BERMUDA	1983	123	0	123	0	0	0	2.16	30
BERMUDA	1984	121	0	121	0	0	0	2.11	26
BERMUDA	1985	123	0	123	0	0	0	2.13	22
BERMUDA	1986	116	0	116	0	0	0	1.99	21
BERMUDA	1987	157	0	157	0	0	0	2.67	33
BERMUDA	1988	177	0	177	0	0	0	2.99	32
BERMUDA	1989	214	0	214	0	0	0	3.61	26
BERMUDA	1990	163	0	163	0	0	0	2.73	15
BERMUDA	1991	139	0	139	0	0	0	2.31	15
BERMUDA	1992	111	0	111	0	0	0	1.83	13
BERMUDA	1993	131	0	131	0	0	0	2.15	13
BERMUDA	1994	129	0	129	0	0	0	2.11	13
BERMUDA	1995	127	0	127	0	0	0	2.07	14
BERMUDA	1996	130	0	130	0	0	0	2.1	14
BERMUDA	1997	130	0	130	0	0	0	2.09	14
BERMUDA	1998	126	0	126	0	0	0	2.03	14
BERMUDA	1999	135	0	135	0	0	0	2.15	16
BERMUDA	2000	135	0	135	0	0	0	2.14	16
BERMUDA	2001	135	0	135	0	0	0	2.13	16
BERMUDA	2002	143	0	143	0	0	0	2.26	18
BERMUDA	2003	139	0	139	0	0	0	2.18	16
BERMUDA	2004	183	0	183	0	0	0	2.87	17
BERMUDA	2005	121	0	121	0	0	0	1.89	27
BERMUDA	2006	142	0	142	0	0	0	2.21	32
BERMUDA	2007	141	0	141	0	0	0	2.18	46
BERMUDA	2008	106	0	106	0	0	0	1.64	58
BHUTAN	1970	1	0	1	0	0	0	0	0
BHUTAN	1971	1	0	1	0	0	0	0	0
BHUTAN	1972	1	0	1	0	0	0	0	0
BHUTAN	1973	1	0	1	0	0	0	0	0
BHUTAN	1974	1	0	1	0	0	0	0	0
BHUTAN	1975	1	0	1	0	0	0	0	0
BHUTAN	1976	1	0	1	0	0	0	0	0
BHUTAN	1977	2	0	2	0	0	0	0	0
BHUTAN	1978	3	0	3	0	0	0	0.01	0
BHUTAN	1979	6	1	5	0	0	0	0.01	0
BHUTAN	1980	6	1	5	0	0	0	0.01	0
BHUTAN	1981	7	1	7	0	0	0	0.02	0
BHUTAN	1982	9	1	8	0	0	0	0.02	0
BHUTAN	1983	8	1	8	0	0	0	0.02	0
BHUTAN	1984	14	0	14	0	0	0	0.03	0
BHUTAN	1985	17	0	17	0	0	0	0.03	0
BHUTAN	1986	15	0	15	0	0	0	0.03	0
BHUTAN	1987	28	12	16	0	0	0	0.05	0
BHUTAN	1988	30	13	17	0	0	0	0.06	0
BHUTAN	1989	17	0	17	0	0	0	0.03	0
BHUTAN	1990	35	13	22	0	0	0	0.06	0
BHUTAN	1991	51	13	22	0	16	0	0.09	0
BHUTAN	1992	59	22	22	0	16	0	0.11	0
BHUTAN	1993	51	12	24	0	15	0	0.1	0
BHUTAN	1994	58	17	25	0	16	0	0.11	0
BHUTAN	1995	68	21	28	0	19	0	0.13	0
BHUTAN	1996	83	25	35	0	22	0	0.16	0
BHUTAN	1997	108	51	34	0	22	0	0.21	0
BHUTAN	1998	105	49	36	0	20	0	0.2	0
BHUTAN	1999	105	48	38	0	20	0	0.19	0
BHUTAN	2000	109	48	41	0	20	0	0.19	0
BHUTAN	2001	113	47	44	0	22	0	0.2	0
BHUTAN	2002	140	72	46	0	22	0	0.23	1
BHUTAN	2003	127	54	51	0	22	0	0.21	1
BHUTAN	2004	128	51	54	0	23	0	0.2	1
BHUTAN	2005	186	106	58	0	23	0	0.29	1
BHUTAN	2006	115	31	60	0	24	0	0.17	1
BHUTAN	2007	158	72	61	0	24	0	0.23	1
BHUTAN	2008	200	117	59	0	23	0	0.29	1
BOSNIA & HERZEGOVINA	1990
BOSNIA & HERZEGOVINA	1991
BOSNIA & HERZEGOVINA	1992	1074	458	449	148	20	0	0.27	0
BOSNIA & HERZEGOVINA	1993	892	343	392	136	20	0	0.24	0
BOSNIA & HERZEGOVINA	1994	990	321	470	167	33	0	0.29	0
BOSNIA & HERZEGOVINA	1995	966	376	483	77	31	0	0.29	0
BOSNIA & HERZEGOVINA	1996	1464	817	498	129	20	0	0.44	0
BOSNIA & HERZEGOVINA	1997	3409	2791	513	77	27	0	1.01	0
BOSNIA & HERZEGOVINA	1998	4425	3675	621	88	41	0	1.27	0
BOSNIA & HERZEGOVINA	1999	5119	4373	615	90	41	0	1.42	0
BOSNIA & HERZEGOVINA	2000	6341	5222	909	125	85	0	1.72	0
BOSNIA & HERZEGOVINA	2001	5651	4581	893	82	96	0	1.51	0
BOSNIA & HERZEGOVINA	2002	6257	5203	852	77	124	0	1.66	0
BOSNIA & HERZEGOVINA	2003	6344	5338	785	101	121	0	1.68	0
BOSNIA & HERZEGOVINA	2004	6718	5482	935	159	142	0	1.78	0
BOSNIA & HERZEGOVINA	2005	6990	5802	860	189	140	0	1.85	0
BOSNIA & HERZEGOVINA	2006	7491	6212	913	199	167	0	1.98	0
BOSNIA & HERZEGOVINA	2007	7905	6557	965	210	174	0	2.09	0
BOSNIA & HERZEGOVINA	2008	8529	7102	1016	220	191	0	2.26	0
BOTSWANA	1972	6	6	0	0	0	0	0.01	0
BOTSWANA	1973	14	14	0	0	0	0	0.02	0
BOTSWANA	1974	24	24	0	0	0	0	0.03	0
BOTSWANA	1975	51	51	0	0	0	0	0.06	0
BOTSWANA	1976	162	162	0	0	0	0	0.19	0
BOTSWANA	1977	213	213	0	0	0	0	0.24	0
BOTSWANA	1978	227	227	0	0	0	0	0.25	0
BOTSWANA	1979	257	257	0	0	0	0	0.27	0
BOTSWANA	1980	269	269	0	0	0	0	0.27	0
BOTSWANA	1981	275	275	0	0	0	0	0.27	0
BOTSWANA	1982	300	300	0	0	0	0	0.28	0
BOTSWANA	1983	281	281	0	0	0	0	0.26	0
BOTSWANA	1984	285	285	0	0	0	0	0.25	0
BOTSWANA	1985	316	316	0	0	0	0	0.27	0
BOTSWANA	1986	361	361	0	0	0	0	0.3	0
BOTSWANA	1987	419	419	0	0	0	0	0.34	0
BOTSWANA	1988	441	441	0	0	0	0	0.35	0
BOTSWANA	1989	484	484	0	0	0	0	0.37	0
BOTSWANA	1990	594	592	2	0	0	0	0.44	0
BOTSWANA	1991	586	582	3	0	0	0	0.42	0
BOTSWANA	1992	899	659	240	0	0	0	0.63	0
BOTSWANA	1993	957	652	306	0	0	0	0.65	0
BOTSWANA	1994	957	662	296	0	0	0	0.63	0
BOTSWANA	1995	961	669	292	0	0	0	0.62	5
BOTSWANA	1996	856	537	319	0	0	0	0.54	5
BOTSWANA	1997	876	576	300	0	0	0	0.54	4
BOTSWANA	1998	1045	685	360	0	0	0	0.63	3
BOTSWANA	1999	967	540	427	0	0	0	0.57	5
BOTSWANA	2000	1166	696	471	0	0	0	0.68	6
BOTSWANA	2001	1182	679	503	0	0	0	0.68	9
BOTSWANA	2002	1223	708	515	0	0	0	0.69	6
BOTSWANA	2003	1163	611	552	0	0	0	0.65	6
BOTSWANA	2004	1194	672	522	0	0	0	0.66	7
BOTSWANA	2005	1234	702	532	0	0	0	0.67	9
BOTSWANA	2006	1216	668	548	0	0	0	0.65	9
BOTSWANA	2007	1265	642	623	0	0	0	0.67	7
BOTSWANA	2008	1320	624	696	0	0	0	0.69	14
BRAZIL	1901	574	574	0	0	0	.	.	0
BRAZIL	1902	740	684	57	0	0	.	.	0
BRAZIL	1903	721	666	54	0	0	.	.	0
BRAZIL	1904	772	715	57	0	0	.	.	0
BRAZIL	1905	828	764	64	0	0	.	.	0
BRAZIL	1906	939	875	64	0	0	.	.	0
BRAZIL	1907	1013	942	71	0	0	.	.	0
BRAZIL	1908	1053	981	72	0	0	.	.	0
BRAZIL	1909	1062	985	77	0	0	.	.	0
BRAZIL	1910	1240	1146	95	0	0	.	.	0
BRAZIL	1911	1343	1257	86	0	0	.	.	0
BRAZIL	1912	1644	1526	118	0	0	.	.	0
BRAZIL	1913	1782	1647	136	0	0	.	.	0
BRAZIL	1914	1241	1121	120	0	0	.	.	0
BRAZIL	1915	1019	858	162	0	0	.	.	0
BRAZIL	1916	988	786	202	0	0	.	.	0
BRAZIL	1917	826	682	144	0	0	.	.	0
BRAZIL	1918	701	634	67	0	0	.	.	0
BRAZIL	1919	1112	838	274	0	0	.	.	0
BRAZIL	1920	1278	995	284	0	0	.	.	0
BRAZIL	1921	1125	789	336	0	0	.	.	0
BRAZIL	1922	1282	1032	250	0	0	.	.	0
BRAZIL	1923	1538	1260	278	0	0	.	.	0
BRAZIL	1924	1771	1393	378	0	0	.	.	0
BRAZIL	1925	1920	1467	454	0	0	.	.	0
BRAZIL	1926	1914	1495	419	0	0	.	.	0
BRAZIL	1927	2249	1658	591	0	0	.	.	0
BRAZIL	1928	2233	1606	615	0	12	.	.	0
BRAZIL	1929	2396	1719	664	0	13	.	.	0
BRAZIL	1930	2149	1494	644	0	12	.	.	0
BRAZIL	1931	1748	1115	610	0	23	.	.	0
BRAZIL	1932	1653	1118	515	0	20	.	.	0
BRAZIL	1933	1948	1259	659	0	30	.	.	0
BRAZIL	1934	1958	1218	697	0	44	.	.	0
BRAZIL	1935	2210	1453	708	0	50	.	.	0
BRAZIL	1936	2224	1328	830	0	66	.	.	0
BRAZIL	1937	2556	1552	926	0	78	.	.	0
BRAZIL	1938	2611	1539	988	0	84	.	.	0
BRAZIL	1939	2656	1493	1067	0	95	.	.	0
BRAZIL	1940	2783	1629	1053	0	101	.	.	0
BRAZIL	1941	2604	1572	927	0	104	.	.	0
BRAZIL	1942	2219	1487	629	1	102	.	.	0
BRAZIL	1943	2394	1628	662	3	102	.	.	0
BRAZIL	1944	2226	1476	638	2	110	.	.	0
BRAZIL	1945	2647	1740	800	1	105	.	.	0
BRAZIL	1946	3372	1882	1373	5	112	.	.	0
BRAZIL	1947	4511	2300	2087	1	124	.	.	0
BRAZIL	1948	4779	1974	2652	2	151	.	.	0
BRAZIL	1949	4956	1824	2955	3	174	.	.	0
BRAZIL	1950	5367	1742	3433	1	189	2	0.1	290
BRAZIL	1951	5913	1713	3997	1	198	4	0.11	290
BRAZIL	1952	6807	1640	4943	1	220	4	0.12	121
BRAZIL	1953	6885	1534	5060	2	276	14	0.12	347
BRAZIL	1954	8102	1570	6155	4	340	34	0.13	275
BRAZIL	1955	9289	1600	7276	4	377	33	0.15	43
BRAZIL	1956	9995	1384	8116	5	445	45	0.15	47
BRAZIL	1957	9822	1372	7930	9	462	49	0.15	51
BRAZIL	1958	10663	1078	8967	18	515	85	0.16	60
BRAZIL	1959	10653	1121	8863	25	522	122	0.15	60
BRAZIL	1960	12792	1355	10649	31	608	149	0.18	64
BRAZIL	1961	13418	1277	11318	31	641	150	0.18	64
BRAZIL	1962	14643	1547	12235	30	690	142	0.19	64
BRAZIL	1963	15167	1479	12803	45	705	135	0.19	64
BRAZIL	1964	15472	1684	12828	44	765	152	0.19	180
BRAZIL	1965	15380	1895	12490	53	764	177	0.18	182
BRAZIL	1966	17536	2283	14153	67	822	211	0.2	215
BRAZIL	1967	18051	2217	14663	70	871	230	0.2	205
BRAZIL	1968	21113	2329	17462	63	990	270	0.23	218
BRAZIL	1969	22993	2570	18947	64	1064	348	0.25	248
BRAZIL	1970	25569	2430	21357	42	1224	515	0.27	710
BRAZIL	1971	27989	2452	23759	68	1333	377	0.28	744
BRAZIL	1972	31187	2558	26672	75	1548	334	0.31	1029
BRAZIL	1973	36123	2459	31486	103	1822	253	0.35	1077
BRAZIL	1974	39121	2604	34071	189	2028	229	0.37	1159
BRAZIL	1975	41223	3019	35400	213	2371	220	0.38	1272
BRAZIL	1976	42311	3144	36083	250	2604	230	0.38	1150
BRAZIL	1977	44440	4109	36925	309	2873	224	0.39	970
BRAZIL	1978	48248	4833	39703	405	3030	278	0.42	1075
BRAZIL	1979	51356	5039	42175	445	3383	315	0.43	1209
BRAZIL	1980	51020	5455	40997	514	3698	357	0.42	1012
BRAZIL	1981	46852	5383	36989	460	3543	477	0.38	1268
BRAZIL	1982	46953	5882	36352	650	3488	581	0.37	1345
BRAZIL	1983	45441	6530	34317	922	2838	833	0.35	1418
BRAZIL	1984	46034	7914	33314	1138	2685	983	0.35	1312
BRAZIL	1985	49427	9517	34802	1363	2803	941	0.36	1337
BRAZIL	1986	54236	9586	38858	1634	3440	718	0.39	1155
BRAZIL	1987	56594	10981	39722	1812	3464	615	0.4	1089
BRAZIL	1988	57094	10856	40298	1867	3445	628	0.4	821
BRAZIL	1989	58365	10898	41370	1994	3526	577	0.4	893
BRAZIL	1990	56964	9749	41067	2025	3509	614	0.38	860
BRAZIL	1991	59812	11191	42317	1981	3739	585	0.39	1076
BRAZIL	1992	60187	10756	43516	2128	3251	535	0.39	1099
BRAZIL	1993	62923	11029	45589	2324	3379	602	0.4	1304
BRAZIL	1994	66036	11485	48074	2411	3431	634	0.41	1539
BRAZIL	1995	75147	12109	55974	2587	3843	634	0.46	1569
BRAZIL	1996	82150	12788	60862	2899	4705	896	0.5	1801
BRAZIL	1997	87592	13002	65262	3218	5181	929	0.53	2181
BRAZIL	1998	85632	12710	62938	3377	5432	1175	0.51	2258
BRAZIL	1999	87829	13149	64067	3797	5477	1339	0.51	2929
BRAZIL	2000	90026	13976	64409	4915	5332	1394	0.52	3093
BRAZIL	2001	92690	13811	65799	6245	5294	1542	0.52	3348
BRAZIL	2002	91406	13315	63931	7731	5172	1257	0.51	3742
BRAZIL	2003	88561	14284	60738	7966	4625	947	0.49	3676
BRAZIL	2004	93037	14857	62674	9844	4680	982	0.51	3775
BRAZIL	2005	95437	14403	64295	10439	4988	1312	0.51	3915
BRAZIL	2006	96139	14254	64602	10928	5377	978	0.51	3968
BRAZIL	2007	100455	15093	66934	11066	6311	1051	0.53	4284
BRAZIL	2008	107232	15273	70521	13245	7054	1139	0.56	5238
BRITISH VIRGIN ISLANDS	1962	1	0	1	0	0	0	0.1	0
BRITISH VIRGIN ISLANDS	1963	1	0	1	0	0	0	0.1	0
BRITISH VIRGIN ISLANDS	1964	2	0	2	0	0	0	0.19	0
BRITISH VIRGIN ISLANDS	1965	2	0	2	0	0	0	0.19	0
BRITISH VIRGIN ISLANDS	1966	3	0	3	0	0	0	0.37	0
BRITISH VIRGIN ISLANDS	1967	1	0	1	0	0	0	0.09	0
BRITISH VIRGIN ISLANDS	1968	4	0	4	0	0	0	0.44	0
BRITISH VIRGIN ISLANDS	1969	5	0	5	0	0	0	0.52	0
BRITISH VIRGIN ISLANDS	1970	5	0	5	0	0	0	0.51	0
BRITISH VIRGIN ISLANDS	1971	6	0	6	0	0	0	0.59	0
BRITISH VIRGIN ISLANDS	1972	6	0	6	0	0	0	0.58	0
BRITISH VIRGIN ISLANDS	1973	7	0	7	0	0	0	0.65	0
BRITISH VIRGIN ISLANDS	1974	7	0	7	0	0	0	0.64	0
BRITISH VIRGIN ISLANDS	1975	7	0	7	0	0	0	0.64	0
BRITISH VIRGIN ISLANDS	1976	7	0	7	0	0	0	0.63	0
BRITISH VIRGIN ISLANDS	1977	7	0	7	0	0	0	0.63	0
BRITISH VIRGIN ISLANDS	1978	7	0	7	0	0	0	0.63	0
BRITISH VIRGIN ISLANDS	1979	7	0	7	0	0	0	0.62	0
BRITISH VIRGIN ISLANDS	1980	7	0	7	0	0	0	0.61	0
BRITISH VIRGIN ISLANDS	1981	12	0	12	0	0	0	1.03	0
BRITISH VIRGIN ISLANDS	1982	10	0	10	0	0	0	0.86	0
BRITISH VIRGIN ISLANDS	1983	10	0	10	0	0	0	0.82	0
BRITISH VIRGIN ISLANDS	1984	9	0	9	0	0	0	0.72	0
BRITISH VIRGIN ISLANDS	1985	10	0	10	0	0	0	0.75	0
BRITISH VIRGIN ISLANDS	1986	11	0	11	0	0	0	0.78	0
BRITISH VIRGIN ISLANDS	1987	12	0	12	0	0	0	0.8	0
BRITISH VIRGIN ISLANDS	1988	13	0	13	0	0	0	0.82	0
BRITISH VIRGIN ISLANDS	1989	13	0	13	0	0	0	0.84	0
BRITISH VIRGIN ISLANDS	1990	13	0	13	0	0	0	0.81	0
BRITISH VIRGIN ISLANDS	1991	13	0	13	0	0	0	0.79	0
BRITISH VIRGIN ISLANDS	1992	14	0	14	0	0	0	0.82	0
BRITISH VIRGIN ISLANDS	1993	14	0	14	0	0	0	0.8	0
BRITISH VIRGIN ISLANDS	1994	14	0	14	0	0	0	0.79	0
BRITISH VIRGIN ISLANDS	1995	14	0	14	0	0	0	0.77	0
BRITISH VIRGIN ISLANDS	1996	16	0	16	0	0	0	0.84	0
BRITISH VIRGIN ISLANDS	1997	16	0	16	0	0	0	0.82	0
BRITISH VIRGIN ISLANDS	1998	16	0	16	0	0	0	0.81	0
BRITISH VIRGIN ISLANDS	1999	16	0	16	0	0	0	0.79	0
BRITISH VIRGIN ISLANDS	2000	16	0	16	0	0	0	0.78	0
BRITISH VIRGIN ISLANDS	2001	16	0	16	0	0	0	0.76	0
BRITISH VIRGIN ISLANDS	2002	18	0	18	0	0	0	0.87	0
BRITISH VIRGIN ISLANDS	2003	21	0	21	0	0	0	0.97	0
BRITISH VIRGIN ISLANDS	2004	23	0	23	0	0	0	1.08	0
BRITISH VIRGIN ISLANDS	2005	24	0	24	0	0	0	1.1	0
BRITISH VIRGIN ISLANDS	2006	27	0	27	0	0	0	1.2	0
BRITISH VIRGIN ISLANDS	2007	27	0	27	0	0	0	1.19	0
BRITISH VIRGIN ISLANDS	2008	28	0	28	0	0	0	1.25	0
BRUNEI (DARUSSALAM)	1930	0	0	0	0	0	.	.	0
BRUNEI (DARUSSALAM)	1931	0	0	0	0	0	.	.	0
BRUNEI (DARUSSALAM)	1932	0	0	0	0	0	.	.	0
BRUNEI (DARUSSALAM)	1933	1	0	0	1	0	.	.	0
BRUNEI (DARUSSALAM)	1934	12	0	0	12	0	.	.	0
BRUNEI (DARUSSALAM)	1935	7	0	0	7	0	.	.	0
BRUNEI (DARUSSALAM)	1936	21	0	6	15	0	.	.	0
BRUNEI (DARUSSALAM)	1937	56	0	12	44	0	.	.	0
BRUNEI (DARUSSALAM)	1938	59	0	9	50	0	.	.	0
BRUNEI (DARUSSALAM)	1939	717	0	654	63	0	.	.	0
BRUNEI (DARUSSALAM)	1940	808	0	728	81	0	.	.	0
BRUNEI (DARUSSALAM)	1941	537	0	520	17	0	.	.	0
BRUNEI (DARUSSALAM)	1942	340	0	340	0	0	.	.	0
BRUNEI (DARUSSALAM)	1943	511	0	511	0	0	.	.	0
BRUNEI (DARUSSALAM)	1944	681	0	681	0	0	.	.	0
BRUNEI (DARUSSALAM)	1945	251	0	251	0	0	.	.	0
BRUNEI (DARUSSALAM)	1946	258	0	243	15	0	.	.	0
BRUNEI (DARUSSALAM)	1947	1461	0	1447	14	0	.	.	0
BRUNEI (DARUSSALAM)	1948	22	0	3	20	0	.	.	0
BRUNEI (DARUSSALAM)	1949	3130	0	2810	320	0	.	.	0
BRUNEI (DARUSSALAM)	1950	113	0	42	71	0	0	2.35	0
BRUNEI (DARUSSALAM)	1951	82	0	9	73	0	0	1.61	0
BRUNEI (DARUSSALAM)	1952	88	0	14	74	0	0	1.63	0
BRUNEI (DARUSSALAM)	1953	94	0	21	73	0	0	1.65	0
BRUNEI (DARUSSALAM)	1954	98	0	23	74	0	0	1.63	0
BRUNEI (DARUSSALAM)	1955	82	0	9	73	0	0	1.29	0
BRUNEI (DARUSSALAM)	1956	81	0	8	74	0	0	1.22	0
BRUNEI (DARUSSALAM)	1957	80	0	8	72	0	0	1.14	0
BRUNEI (DARUSSALAM)	1958	87	0	6	82	0	0	1.18	0
BRUNEI (DARUSSALAM)	1959	89	0	8	82	0	0	1.14	0
BRUNEI (DARUSSALAM)	1960	91	0	8	83	0	0	1.11	0
BRUNEI (DARUSSALAM)	1961	83	0	8	75	0	0	0.97	0
BRUNEI (DARUSSALAM)	1962	101	0	20	80	0	0	1.12	0
BRUNEI (DARUSSALAM)	1963	97	0	15	82	0	0	1.03	0
BRUNEI (DARUSSALAM)	1964	93	0	20	73	0	0	0.95	0
BRUNEI (DARUSSALAM)	1965	91	0	3	89	0	0	0.89	0
BRUNEI (DARUSSALAM)	1966	134	0	55	79	0	0	1.25	0
BRUNEI (DARUSSALAM)	1967	120	0	39	80	0	0	1.06	0
BRUNEI (DARUSSALAM)	1968	117	0	39	78	0	0	0.99	0
BRUNEI (DARUSSALAM)	1969	133	0	45	88	0	0	1.07	0
BRUNEI (DARUSSALAM)	1970	2239	0	52	106	0	2081	17.26	0
BRUNEI (DARUSSALAM)	1971	2050	0	71	99	0	1880	15.11	0
BRUNEI (DARUSSALAM)	1972	2580	0	60	201	0	2319	18.19	0
BRUNEI (DARUSSALAM)	1973	2722	0	68	235	0	2420	18.39	0
BRUNEI (DARUSSALAM)	1974	2232	0	80	373	0	1780	14.46	0
BRUNEI (DARUSSALAM)	1975	1931	0	82	414	0	1435	12.01	0
BRUNEI (DARUSSALAM)	1976	1643	0	92	279	0	1271	9.82	0
BRUNEI (DARUSSALAM)	1977	1744	0	121	488	0	1134	10.03	0
BRUNEI (DARUSSALAM)	1978	2602	0	148	983	0	1471	14.43	0
BRUNEI (DARUSSALAM)	1979	2029	0	174	948	0	907	10.86	0
BRUNEI (DARUSSALAM)	1980	1877	1	184	792	0	900	9.72	0
BRUNEI (DARUSSALAM)	1981	401	0	-161	323	0	239	2.01	0
BRUNEI (DARUSSALAM)	1982	571	0	-156	321	0	405	2.79	0
BRUNEI (DARUSSALAM)	1983	738	0	-8	358	0	388	3.5	0
BRUNEI (DARUSSALAM)	1984	523	0	179	299	0	44	2.41	0
BRUNEI (DARUSSALAM)	1985	708	0	334	337	0	37	3.18	0
BRUNEI (DARUSSALAM)	1986	627	0	360	257	0	9	2.73	0
BRUNEI (DARUSSALAM)	1987	905	0	325	567	0	13	3.84	0
BRUNEI (DARUSSALAM)	1988	1559	0	437	1109	0	13	6.42	0
BRUNEI (DARUSSALAM)	1989	1731	0	430	1288	0	13	6.93	0
BRUNEI (DARUSSALAM)	1990	1751	0	482	1253	0	16	6.81	0
BRUNEI (DARUSSALAM)	1991	1586	0	585	673	0	328	6	0
BRUNEI (DARUSSALAM)	1992	1584	0	507	765	0	312	5.83	0
BRUNEI (DARUSSALAM)	1993	1524	0	606	756	0	161	5.45	0
BRUNEI (DARUSSALAM)	1994	1475	0	564	717	0	194	5.14	0
BRUNEI (DARUSSALAM)	1995	1504	0	496	746	0	262	5.1	0
BRUNEI (DARUSSALAM)	1996	1526	0	523	771	34	198	5.04	0
BRUNEI (DARUSSALAM)	1997	1585	0	554	800	34	197	5.11	0
BRUNEI (DARUSSALAM)	1998	1632	0	583	832	29	188	5.13	0
BRUNEI (DARUSSALAM)	1999	1254	0	610	455	28	161	3.85	0
BRUNEI (DARUSSALAM)	2000	1780	0	724	831	32	193	5.34	0
BRUNEI (DARUSSALAM)	2001	1690	0	707	793	31	159	4.96	0
BRUNEI (DARUSSALAM)	2002	1451	0	453	778	33	187	4.17	0
BRUNEI (DARUSSALAM)	2003	1461	0	437	792	32	200	4.11	0
BRUNEI (DARUSSALAM)	2004	1462	0	373	885	33	170	4.03	0
BRUNEI (DARUSSALAM)	2005	1398	0	322	896	36	144	3.78	0
BRUNEI (DARUSSALAM)	2006	1315	0	255	884	33	144	3.48	0
BRUNEI (DARUSSALAM)	2007	2607	0	831	1606	27	143	6.77	0
BRUNEI (DARUSSALAM)	2008	2889	0	947	1772	27	143	7.37	0
BULGARIA	1879	0	0	0	0	0	.	.	0
BULGARIA	1880	0	0	0	0	0	.	.	0
BULGARIA	1881	1	1	0	0	0	.	.	0
BULGARIA	1882	1	1	0	0	0	.	.	0
BULGARIA	1883	2	2	0	0	0	.	.	0
BULGARIA	1884	3	3	0	0	0	.	.	0
BULGARIA	1885	2	2	0	0	0	.	.	0
BULGARIA	1886	2	2	0	0	0	.	.	0
BULGARIA	1887	9	3	7	0	0	.	.	0
BULGARIA	1888	10	5	5	0	0	.	.	0
BULGARIA	1889	14	7	8	0	0	.	.	0
BULGARIA	1890	20	9	11	0	0	.	.	0
BULGARIA	1891	21	11	10	0	0	.	.	0
BULGARIA	1892	22	13	9	0	0	.	.	0
BULGARIA	1893	28	17	12	0	0	.	.	0
BULGARIA	1894	36	22	14	0	0	.	.	0
BULGARIA	1895	33	23	9	0	0	.	.	0
BULGARIA	1896	39	29	10	0	0	.	.	0
BULGARIA	1897	44	30	13	0	0	.	.	0
BULGARIA	1898	51	40	12	0	0	.	.	0
BULGARIA	1899	50	40	10	0	0	.	.	0
BULGARIA	1900	72	59	13	0	0	.	.	0
BULGARIA	1901	86	74	13	0	0	.	.	0
BULGARIA	1902	75	65	10	0	0	.	.	0
BULGARIA	1903	77	64	13	0	0	.	.	0
BULGARIA	1904	99	82	18	0	0	.	.	0
BULGARIA	1905	110	98	12	0	0	.	.	0
BULGARIA	1906	103	86	17	0	0	.	.	0
BULGARIA	1907	135	124	12	0	0	.	.	0
BULGARIA	1908	178	163	15	0	0	.	.	0
BULGARIA	1909	182	165	18	0	0	.	.	0
BULGARIA	1910	192	173	18	0	0	.	.	0
BULGARIA	1911	262	245	17	0	0	.	.	0
BULGARIA	1912	260	245	15	0	0	.	.	0
BULGARIA	1913	237	215	22	0	0	.	.	0
BULGARIA	1914	344	323	21	0	0	.	.	0
BULGARIA	1915	219	208	11	0	0	.	.	0
BULGARIA	1916	258	252	6	0	0	.	.	0
BULGARIA	1917	313	311	2	0	0	.	.	0
BULGARIA	1918	394	388	5	0	0	.	.	0
BULGARIA	1919	244	228	17	0	0	.	.	0
BULGARIA	1920	305	300	5	0	0	.	.	0
BULGARIA	1921	391	373	18	0	0	.	.	0
BULGARIA	1922	438	412	26	0	0	.	.	0
BULGARIA	1923	471	438	33	0	0	.	.	0
BULGARIA	1924	533	503	30	0	0	.	.	0
BULGARIA	1925	531	494	37	0	0	.	.	0
BULGARIA	1926	526	486	40	0	0	.	.	0
BULGARIA	1927	538	496	43	0	0	.	.	0
BULGARIA	1928	634	569	50	0	15	.	.	0
BULGARIA	1929	742	657	64	0	21	.	.	0
BULGARIA	1930	722	632	66	0	24	.	.	0
BULGARIA	1931	684	607	63	0	14	.	.	0
BULGARIA	1932	774	701	54	0	19	.	.	0
BULGARIA	1933	696	624	55	0	16	.	.	0
BULGARIA	1934	722	651	55	0	16	.	.	0
BULGARIA	1935	739	661	64	0	14	.	.	0
BULGARIA	1936	749	671	63	0	15	.	.	0
BULGARIA	1937	835	743	75	0	18	.	.	0
BULGARIA	1938	939	841	74	0	24	.	.	0
BULGARIA	1939	1034	926	84	0	24	.	.	0
BULGARIA	1940	1204	1119	85	0	0	.	.	0
BULGARIA	1941	1268	1207	61	0	0	.	.	0
BULGARIA	1942	1460	1460	0	0	0	.	.	0
BULGARIA	1943	1586	1586	0	0	0	.	.	0
BULGARIA	1944	1198	1181	0	0	17	.	.	0
BULGARIA	1945	1422	1389	0	0	33	.	.	0
BULGARIA	1946	2900	1358	1542	0	0	.	.	0
BULGARIA	1947	2811	1613	1197	0	0	.	.	0
BULGARIA	1948	1698	1654	0	0	44	.	.	0
BULGARIA	1949	2034	2034	0	0	0	.	.	0
BULGARIA	1950	2047	1816	148	0	82	0	0.28	0
BULGARIA	1951	2229	1972	172	0	86	0	0.31	0
BULGARIA	1952	2574	2285	197	0	92	0	0.35	0
BULGARIA	1953	2890	2572	223	0	95	0	0.39	0
BULGARIA	1954	3110	2751	253	0	106	0	0.42	0
BULGARIA	1955	3301	2890	301	0	110	0	0.44	0
BULGARIA	1956	3540	3061	363	0	117	0	0.47	0
BULGARIA	1957	3928	3381	427	0	120	0	0.51	0
BULGARIA	1958	4266	3718	421	0	127	0	0.55	0
BULGARIA	1959	5357	4561	601	0	195	0	0.69	0
BULGARIA	1960	6080	5083	780	0	216	0	0.77	0
BULGARIA	1961	7083	5849	996	0	238	0	0.89	0
BULGARIA	1962	8382	6749	1376	0	257	0	1.05	0
BULGARIA	1963	9384	7310	1774	0	300	0	1.16	0
BULGARIA	1964	11689	8766	2572	0	351	0	1.44	0
BULGARIA	1965	12631	9255	2976	34	365	0	1.54	0
BULGARIA	1966	13299	9483	3377	51	388	0	1.61	0
BULGARIA	1967	15044	10289	4143	155	456	0	1.81	0
BULGARIA	1968	16233	10725	4792	239	478	0	1.94	0
BULGARIA	1969	18101	11227	6143	248	483	0	2.15	0
BULGARIA	1970	16700	9041	6936	225	499	0	1.97	111
BULGARIA	1971	17535	8772	8080	155	528	0	2.05	154
BULGARIA	1972	18045	8954	8455	104	532	0	2.1	167
BULGARIA	1973	18769	9153	8944	105	568	0	2.17	141
BULGARIA	1974	19433	9044	9576	229	584	0	2.24	154
BULGARIA	1975	19924	9388	9336	607	593	0	2.28	171
BULGARIA	1976	19939	8656	9629	1062	593	0	2.28	205
BULGARIA	1977	20717	8632	10096	1355	634	0	2.36	175
BULGARIA	1978	22201	9250	10806	1445	700	0	2.52	171
BULGARIA	1979	21585	9545	9760	1546	735	0	2.44	171
BULGARIA	1980	21131	9982	8443	1978	729	0	2.38	180
[truncated: 14,229 more rows]

## Sheet: CDIAC Nations 1990
National CO2 Emissions from Fossil-Fuel Burning, Cement Manufacture, and Gas Flaring: 1990
WS 3
Created:		M. Jonas								16 June 2009
Modified:		M. Jonas								01 February 2012
Source:		Global, Regional, and National Fossil-Fuel CO2 Emissions								doi: 10.3334/CDIAC/00001_V2011
		Carbon Dioxide Information Analysis Center, Oak Ridge National Laboratory, Oak Ridge, Tennessee 37831–6335, USA								http://cdiac.ornl.gov/trends/emis/overview_2008.html
Authors:		T.A. Boden, G. Marland and R.J. Andres
Remarks:		1. Annual sums were tallied before each element was rounded and reported by the authors so totals may differ slightly from the sum of the elements due to rounding.
Nation	Year	Total CO2 emissions from fossil-fuels	Emissions from solid fuel consumption	Emissions from liquid fuel consumption	Emissions from gas fuel consumption	Emissions from cement production	Emissions from gas flaring	Per capita carbon emissions	Emissions from bunker fuels
		103 t C	103 t C	103 t C	103 t C	103 t C	103 t C	t C / cap	103 t C
AFGHANISTAN	1990	730	76	522	110	15	7	0.06	5
ALBANIA	1990	2042	758	1055	127	102	0	0.62	0
ALGERIA	1990	21515	825	6835	10619	862	2373	0.85	286
ANDORRA	1990
ANGOLA	1990	1208	0	489	276	35	409	0.11	717
ANGUILLA	1990
ANTARCTIC FISHERIES	1990	3	0	3	0	0	0	2.51	55
ANTIGUA & BARBUDA	1990	82	0	82	0	0	0	1.33	29
ARGENTINA	1990	30710	838	16154	11794	491	1434	0.95	628
ARMENIA	1990
ARUBA	1990	502	0	502	0	0	0	7.94	0
AUSTRALIA	1990	78356	45467	22553	9238	962	136	4.58	1725
AUSTRIA	1990	16624	4510	8450	2998	666	0	2.17	135
AZERBAIJAN	1990
BAHAMAS	1990	532	1	531	0	0	0	2.08	193
BAHRAIN	1990	3241	0	368	2853	20	0	6.57	0
BANGLADESH	1990	4236	292	1830	2068	46	0	0.04	9
BARBADOS	1990	293	0	251	15	27	0	1.13	92
BELARUS	1990
BELGIUM	1990	29580	11011	12524	5102	942	0	2.98	4417
BELIZE	1990	85	0	85	0	0	0	0.45	10
BENIN	1990	195	0	154	0	41	0	0.04	13
BERMUDA	1990	163	0	163	0	0	0	2.73	15
BHUTAN	1990	35	13	22	0	0	0	0.06	0
BOSNIA & HERZEGOVINA	1990
BOTSWANA	1990	594	592	2	0	0	0	0.44	0
BRAZIL	1990	56964	9749	41067	2025	3509	614	0.38	860
BRITISH VIRGIN ISLANDS	1990	13	0	13	0	0	0	0.81	0
BRUNEI (DARUSSALAM)	1990	1751	0	482	1253	0	16	6.81	0
BULGARIA	1990	21197	9925	7598	3033	641	0	2.4	279
BURKINA FASO	1990	160	0	160	0	0	0	0.02	0
BURUNDI	1990	83	4	79	0	0	0	0.01	4
CAMBODIA	1990	123	0	123	0	0	0	0.01	0
CANADA	1990	122737	25936	56382	37637	1591	1191	4.43	1322
CAPE VERDE	1990	24	0	24	0	0	0	0.07	4
CAYMAN ISLANDS	1990	69	0	69	0	0	0	2.63	5
CENTRAL AFRICAN REPUBLIC	1990	54	0	54	0	0	0	0.02	10
CHAD	1990	40	0	40	0	0	0	0.01	14
CHILE	1990	9518	2922	5289	913	288	105	0.72	243
CHINA (MAINLAND)	1990	671051	539488	95006	7997	28560	0	0.59	0
COLOMBIA	1990	15636	3789	8491	2285	850	220	0.47	89
COMOROS	1990	21	0	21	0	0	0	0.05	0
CONGO	1990	324	0	265	1	12	46	0.13	4
COOK ISLANDS	1990	6	0	6	0	0	0	0.33	7
COSTA RICA	1990	806	0	722	0	84	0	0.26	0
COTE D IVOIRE	1990	1581	0	1513	0	68	0	0.13	112
CROATIA	1990
CUBA	1990	9092	108	8558	19	408	0	0.86	268
CYPRUS	1990	1269	78	1037	0	154	0	1.86	251
CZECH REPUBLIC	1990
CZECHOSLOVAKIA	1990	59383	42182	9782	6032	1387	0	3.79	0
DEMOCRATIC PEOPLE S REPUBLIC OF KOREA	1990	66767	60916	3676	0	2176	0	3.31	0
DEMOCRATIC REPUBLIC OF THE CONGO (FORMERLY ZAIRE)	1990	1110	209	838	0	63	0	0.03	116
DENMARK	1990	13750	6401	6007	1050	226	66	2.68	1432
DJIBOUTI	1990	109	0	109	0	0	0	0.19	272
DOMINICA	1990	16	0	16	0	0	0	0.23	0
DOMINICAN REPUBLIC	1990	2610	7	2459	0	144	0	0.35	0
ECUADOR	1990	4591	0	3690	139	306	456	0.45	177
EGYPT	1990	20710	917	14323	3552	1918	0	0.36	1411
EL SALVADOR	1990	714	0	627	0	87	0	0.13	0
EQUATORIAL GUINEA	1990	33	0	33	0	0	0	0.09	0
ERITREA	1990
ESTONIA	1990
ETHIOPIA	1990	823	0	777	0	46	0	0.02	53
FAEROE ISLANDS	1990	170	0	170	0	0	0	3.59	0
FALKLAND ISLANDS (MALVINAS)	1990	10	4	7	0	0	0	5.18	0
FEDERAL REPUBLIC OF GERMANY	1990	191890	79117	78159	30148	4148	317	3.13	5065
FEDERATED STATES OF MICRONESIA	1990
FIJI	1990	223	17	194	0	11	0	0.31	74
FINLAND	1990	13892	5521	6780	1363	227	0	2.79	769
FORMER DEMOCRATIC YEMEN	1990	1590	0	1590	0	0	0	0.64	292
FORMER GERMAN DEMOCRATIC REPUBLIC	1990	84527	65066	14761	3717	983	0	5.2	0
FORMER YEMEN	1990	1027	0	914	0	113	0	0.11	43
FRANCE (INCLUDING MONACO)	1990	108816	21813	66962	16451	3590	0	1.91	5428
FRENCH GUIANA	1990	222	0	222	0	0	0	1.91	15
FRENCH POLYNESIA	1990	172	0	172	0	0	0	0.88	62
GABON	1990	1321	0	244	138	16	924	1.43	75
GAMBIA	1990	52	0	52	0	0	0	0.06	0
GEORGIA	1990
GERMANY	1990
GHANA	1990	1072	2	978	0	92	0	0.07	18
GIBRALTAR	1990	26	0	26	0	0	0	0.92	385
GREECE	1990	19832	8657	9237	86	1850	1	1.95	2921
GREENLAND	1990	152	0	152	0	0	0	2.73	0
GRENADA	1990	33	0	33	0	0	0	0.34	1
GUADELOUPE	1990	353	0	322	0	31	0	0.91	70
GUATEMALA	1990	1387	0	1155	5	228	0	0.16	0
GUINEA	1990	288	0	288	0	0	0	0.05	10
GUINEA BISSAU	1990	69	0	69	0	0	0	0.07	4
GUYANA	1990	311	0	311	0	0	0	0.42	12
HAITI	1990	271	9	235	0	27	0	0.04	31
HONDURAS	1990	707	0	618	0	89	0	0.14	0
HONG KONG SPECIAL ADMINSTRATIVE REGION OF CHINA	1990	7543	4943	2354	0	246	0	1.32	2574
HUNGARY	1990	17178	5603	6031	5010	534	0	1.66	138
ICELAND	1990	565	66	482	0	16	0	2.22	61
INDIA	1990	188322	130039	43168	5758	6664	2694	0.22	737
INDONESIA	1990	40787	1896	22509	12026	1877	2478	0.23	369
IRAQ	1990	14332	1	10390	403	1360	2178	0.79	132
IRELAND	1990	8295	3454	3436	1183	222	0	2.36	306
ISLAMIC REPUBLIC OF IRAN	1990	61954	1233	41123	11874	1768	5955	1.09	313
ISRAEL	1990	9145	2681	6058	15	390	0	2.03	871
ITALY (INCLUDING SAN MARINO)	1990	115676	13980	71473	24783	5440	0	2.03	4045
JAMAICA	1990	2172	38	2074	0	60	0	0.92	21
JAPAN	1990	298529	79251	180210	27590	11478	0	2.42	8272
JORDAN	1990	2837	0	2589	0	248	0	0.87	195
KAZAKHSTAN	1990
KENYA	1990	1588	110	1273	0	205	0	0.07	192
KIRIBATI	1990	6	0	6	0	0	0	0.08	0
KUWAIT	1990	12387	0	8085	3813	122	367	5.78	162
KUWAITI OIL FIRES	1990
KYRGYZSTAN	1990
LAO PEOPLE S DEMOCRATIC REPUBLIC	1990	64	1	63	0	0	0	0.02	0
LATVIA	1990
LEBANON	1990	2481	0	2359	0	122	0	0.83	51
LIBERIA	1990	132	0	125	0	7	0	0.06	23
LIBYAN ARAB JAMAHIRIYAH	1990	10995	4	6058	2599	367	1969	2.52	248
LITHUANIA	1990
LUXEMBOURG	1990	2698	1167	1203	242	86	0	7.06	109
MACAU SPECIAL ADMINSTRATIVE REGION OF CHINA	1990	282	0	282	0	0	0	0.76	0
MACEDONIA	1990
MADAGASCAR	1990	269	9	252	0	8	0	0.02	10
MALAWI	1990	167	13	141	0	13	0	0.02	11
MALAYSIA	1990	15433	1477	10455	1866	800	836	0.85	79
MALDIVES	1990	42	0	42	0	0	0	0.19	0
MALI	1990	115	0	112	0	3	0	0.01	12
MALTA	1990	594	185	409	0	0	0	1.65	68
MARSHALL ISLANDS	1990	13	0	13	0	0	0	0.28	0
MARTINIQUE	1990	564	0	530	0	34	0	1.57	21
MAURITANIA	1990	727	4	709	0	14	0	0.37	15
MAURITIUS	1990	399	54	345	0	0	0	0.38	102
MEXICO	1990	88793	3227	67186	14444	3237	698	1.06	2013
MONTENEGRO	1990	2739	1994	685	0	60	0	1.24	0
MONGOLIA	1990
MONTSERRAT	1990	9	0	9	0	0	0	0.86	1
MOROCCO	1990	6420	1278	4541	30	571	0	0.26	61
MOZAMBIQUE	1990	273	42	220	0	11	0	0.02	54
MYANMAR (FORMERLY BURMA)	1990	1166	75	558	475	56	2	0.03	15
NAMIBIA	1990	2	0	2	0	0	0	0	0
NAURU	1990	36	0	36	0	0	0	3.93	4
NEPAL	1990	173	9	148	0	15	0	0.01	0
NETHERLAND ANTILLES	1990	1695	0	1695	0	0	0	8.89	1466
NETHERLANDS	1990	44758	10169	14783	19248	507	50	2.99	10788
NEW CALEDONIA	1990	443	119	316	0	9	0	2.59	17
NEW ZEALAND	1990	6551	1224	2761	2434	102	30	1.93	646
NICARAGUA	1990	721	0	558	0	163	0	0.17	0
NIGER	1990	227	88	136	0	3	0	0.03	11
NIGERIA	1990	12374	35	9823	2041	476	0	0.13	646
NIUE	1990	1	0	1	0	0	0	0.36	0
NORWAY	1990	8544	893	5965	1210	171	305	2.01	453
OCCUPIED PALESTINIAN TERRITORY	1990
OMAN	1990	2823	0	1165	1147	136	374	1.53	496
PACIFIC ISLANDS (PALAU)	1990	64	0	64	0	0	0	1.47	13
PAKISTAN	1990	18698	2328	9041	6309	1019	0	0.16	114
PALAU	1990
PANAMA	1990	855	25	759	30	41	0	0.35	0
PAPUA NEW GUINEA	1990	584	1	543	41	0	0	0.14	26
PARAGUAY	1990	617	0	573	0	44	0	0.15	2
PERU	1990	5773	148	4867	357	298	104	0.27	174
PHILIPPINES	1990	12144	1563	9716	0	865	0	0.19	373
PLURINATIONAL STATE OF BOLIVIA	1990	1501	0	960	253	76	211	0.22	0
POLAND	1990	100020	83834	9459	5027	1700	0	2.62	377
PORTUGAL	1990	11924	2824	8110	0	990	0	1.19	770
QATAR	1990	3211	0	746	2429	36	0	6.87	0
REPUBLIC OF CAMEROON	1990	474	1	388	0	85	0	0.04	12
REPUBLIC OF KOREA	1990	66489	25866	34352	1702	4570	0	1.55	1818
REPUBLIC OF MOLDOVA	1990
REUNION	1990	396	0	396	0	0	0	0.66	9
ROMANIA	1990	43322	13061	12820	16153	1288	0	1.87	0
RUSSIAN FEDERATION	1990
RWANDA	1990	186	0	177	0	8	0	0.03	8
SAINT HELENA	1990	2	0	2	0	0	0	0.3	0
SAINT LUCIA	1990	45	0	45	0	0	0	0.33	0
SAMOA	1990	34	0	34	0	0	0	0.21	0
SAO TOME & PRINCIPE	1990	18	0	18	0	0	0	0.16	0
SAUDI ARABIA	1990	58646	0	32102	24786	1632	126	3.61	11828
SENEGAL	1990	868	0	801	3	64	0	0.12	139
SERBIA	1990
SEYCHELLES	1990	31	0	31	0	0	0	0.43	93
SIERRA LEONE	1990	106	0	106	0	0	0	0.03	78
SINGAPORE	1990	12801	21	12528	0	252	0	4.24	10914
SLOVAKIA	1990
SLOVENIA	1990
SOLOMON ISLANDS	1990	44	0	44	0	0	0	0.14	2
SOMALIA	1990	5	0	0	0	5	0	0	0
SOUTH AFRICA	1990	90950	72352	16596	940	1062	0	2.48	0
SPAIN	1990	62065	20165	34941	3103	3822	34	1.6	4281
SRI LANKA	1990	1029	1	975	0	54	0	0.06	381
ST. KITTS-NEVIS	1990	18	0	18	0	0	0	0.43	0
ST. PIERRE & MIQUELON	1990	25	0	25	0	0	0	4	45
ST. VINCENT & THE GRENADINES	1990	22	0	22	0	0	0	0.2	0
SUDAN	1990	1516	0	1493	0	23	0	0.06	32
SURINAME	1990	494	0	487	0	7	0	1.22	0
SWAZILAND	1990	116	116	0	0	0	0	0.13	0
SWEDEN	1990	14101	3004	10429	331	337	0	1.65	813
SWITZERLAND	1990	11717	387	9602	1019	709	0	1.73	858
SYRIAN ARAB REPUBLIC	1990	10213	0	7771	855	476	1111	0.8	408
TAIWAN	1990	34344	11557	19201	1069	2516	0	1.68	1294
TAJIKISTAN	1990
THAILAND	1990	26134	3709	16927	3035	2462	0	0.46	0
TIMOR-LESTE (FORMERLY EAST TIMOR)	1990
TOGO	1990	211	0	157	0	54	0	0.05	3
TONGA	1990	21	0	21	0	0	0	0.22	4
TRINIDAD AND TOBAGO	1990	4625	0	1178	2708	60	679	3.79	24
TUNISIA	1990	3618	72	2414	682	449	1	0.44	116
TURKEY	1990	41121	17927	18071	1783	3332	8	0.73	103
TURKMENISTAN	1990
TURKS AND CAICOS ISLANDS	1990
UGANDA	1990	223	0	219	0	4	0	0.01	0
UKRAINE	1990
UNITED ARAB EMIRATES	1990	14183	0	4810	8379	443	551	7.6	248
UNITED KINGDOM	1990	155500	64596	57882	31022	1999	0	2.71	5687
UNITED REPUBLIC OF TANZANIA	1990	647	3	571	0	73	0	0.03	26
UNITED STATES OF AMERICA	1990	1330618	486368	573613	258727	9710	2201	5.14	28454
URUGUAY	1990	1089	1	1021	0	68	0	0.35	141
USSR	1990	1035322	337029	354554	318337	18632	6770	3.58	0
UZBEKISTAN	1990
VANUATU	1990	19	0	19	0	0	0	0.13	0
VENEZUELA	1990	33314	332	18655	11557	711	2059	1.69	646
VIET NAM	1990	5838	3008	2488	2	340	0	0.09	0
WALLIS AND FUTUNA ISLANDS	1990
WESTERN SAHARA	1990	54	0	54	0	0	0	0.24	3
YEMEN	1990	-818	0	-818	0	0	0	.	0
YUGOSLAVIA (FORMER SOCIALIST FEDERAL REPUBLIC)	1990	36348	19471	12593	3149	1081	55	1.53	0
YUGOSLAVIA (MONTENEGRO & SERBIA)	1990
ZAMBIA	1990	667	227	381	0	59	0	0.08	30
ZIMBABWE	1990	4228	3662	471	0	95	0	0.4	56
Total (in Pg C or Gt C)	1990	5.95474	2.38624	2.36603	1.00502	0.157284	0.040161		0.136748

## Sheet: CDIAC Nations 1991
National CO2 Emissions from Fossil-Fuel Burning, Cement Manufacture, and Gas Flaring: 1991
WS 4
Created:		M. Jonas								16 June 2009
Modified:		M. Jonas								01 February 2012
Source:		Global, Regional, and National Fossil-Fuel CO2 Emissions								doi: 10.3334/CDIAC/00001_V2011
		Carbon Dioxide Information Analysis Center, Oak Ridge National Laboratory, Oak Ridge, Tennessee 37831–6335, USA								http://cdiac.ornl.gov/trends/emis/overview_2008.html
Authors:		T.A. Boden, G. Marland and R.J. Andres
Remarks:		1. Annual sums were tallied before each element was rounded and reported by the authors so totals may differ slightly from the sum of the elements due to rounding.
Nation	Year	Total CO2 emissions from fossil-fuels	Emissions from solid fuel consumption	Emissions from liquid fuel consumption	Emissions from gas fuel consumption	Emissions from cement production	Emissions from gas flaring	Per capita carbon emissions	Emissions from bunker fuels
		103 t C	103 t C	103 t C	103 t C	103 t C	103 t C	t C / cap	103 t C
AFGHANISTAN	1991	680	68	484	106	15	7	0.05	5
ALBANIA	1991	1083	404	522	75	82	0	0.33	0
ALGERIA	1991	22214	829	7675	10488	859	2362	0.86	308
ANDORRA	1991
ANGOLA	1991	1191	0	425	296	35	435	0.11	722
ANGUILLA	1991
ANTARCTIC FISHERIES	1991	4	0	4	0	0	0	4.19	56
ANTIGUA & BARBUDA	1991	80	0	80	0	0	0	1.28	30
ARGENTINA	1991	31912	734	16712	12905	462	1100	0.97	410
ARMENIA	1991
ARUBA	1991	526	0	526	0	0	0	8.02	0
AUSTRALIA	1991	76774	46396	21607	7785	831	155	4.43	1717
AUSTRIA	1991	17968	4508	9432	3345	682	0	2.33	157
AZERBAIJAN	1991
BAHAMAS	1991	486	1	485	0	0	0	1.87	193
BAHRAIN	1991	3137	0	404	2712	20	0	6.15	0
BANGLADESH	1991	4347	93	1745	2472	37	0	0.04	4
BARBADOS	1991	329	0	290	12	27	0	1.26	92
BELARUS	1991
BELGIUM	1991	32064	10470	15162	5455	977	0	3.22	4482
BELIZE	1991	98	0	98	0	0	0	0.5	13
BENIN	1991	226	0	182	0	44	0	0.05	15
BERMUDA	1991	139	0	139	0	0	0	2.31	15
BHUTAN	1991	51	13	22	0	16	0	0.09	0
BOSNIA & HERZEGOVINA	1991
BOTSWANA	1991	586	582	3	0	0	0	0.42	0
BRAZIL	1991	59812	11191	42317	1981	3739	585	0.39	1076
BRITISH VIRGIN ISLANDS	1991	13	0	13	0	0	0	0.79	0
BRUNEI (DARUSSALAM)	1991	1586	0	585	673	0	328	6	0
BULGARIA	1991	16282	8148	5215	2595	323	0	1.86	184
BURKINA FASO	1991	171	0	171	0	0	0	0.02	0
BURUNDI	1991	94	4	90	0	0	0	0.02	4
CAMBODIA	1991	126	0	126	0	0	0	0.01	0
CANADA	1991	122458	27016	54366	38501	1278	1297	4.37	1237
CAPE VERDE	1991	25	0	25	0	0	0	0.07	4
CAYMAN ISLANDS	1991	75	0	75	0	0	0	2.72	5
CENTRAL AFRICAN REPUBLIC	1991	56	0	56	0	0	0	0.02	10
CHAD	1991	19	0	19	0	0	0	0	14
CHILE	1991	8997	2355	5472	799	306	65	0.67	239
CHINA (MAINLAND)	1991	704810	559476	102579	8400	34355	0	0.61	0
COLOMBIA	1991	15577	3388	8733	2373	857	226	0.46	102
COMOROS	1991	21	0	21	0	0	0	0.05	0
CONGO	1991	345	0	284	1	14	46	0.14	5
COOK ISLANDS	1991	6	0	6	0	0	0	0.33	7
COSTA RICA	1991	910	0	815	0	95	0	0.29	0
COTE D IVOIRE	1991	1537	0	1469	0	68	0	0.12	132
CROATIA	1991
CUBA	1991	8081	77	7713	19	272	0	0.76	239
CYPRUS	1991	1293	11	1128	0	154	0	1.88	212
CZECH REPUBLIC	1991
CZECHOSLOVAKIA	1991	54764	38134	9083	6417	1129	0	3.51	0
DEMOCRATIC PEOPLE S REPUBLIC OF KOREA	1991	68488	62762	3550	0	2176	0	3.35	0
DEMOCRATIC REPUBLIC OF THE CONGO (FORMERLY ZAIRE)	1991	1024	216	774	0	34	0	0.03	120
DENMARK	1991	16753	8608	6601	1141	274	129	3.25	1200
DJIBOUTI	1991	109	0	109	0	0	0	0.19	266
DOMINICA	1991	16	0	16	0	0	0	0.23	0
DOMINICAN REPUBLIC	1991	2764	41	2554	0	168	0	0.37	0
ECUADOR	1991	4496	0	3640	164	313	380	0.43	186
EGYPT	1991	21466	736	14428	4068	2234	0	0.36	1163
EL SALVADOR	1991	881	0	789	0	92	0	0.16	0
EQUATORIAL GUINEA	1991	55	0	55	0	0	0	0.14	0
ERITREA	1991
ESTONIA	1991
ETHIOPIA	1991	814	0	775	0	39	0	0.02	55
FAEROE ISLANDS	1991	162	0	162	0	0	0	3.47	0
FALKLAND ISLANDS (MALVINAS)	1991	10	4	7	0	0	0	5.01	0
FEDERAL REPUBLIC OF GERMANY	1991
FEDERATED STATES OF MICRONESIA	1991
FIJI	1991	184	13	160	0	11	0	0.25	58
FINLAND	1991	14969	5747	7601	1441	180	0	2.99	728
FORMER DEMOCRATIC YEMEN	1991
FORMER GERMAN DEMOCRATIC REPUBLIC	1991
FORMER YEMEN	1991
FRANCE (INCLUDING MONACO)	1991	116626	22426	71057	19539	3605	0	2.04	4788
FRENCH GUIANA	1991	229	0	229	0	0	0	1.88	13
FRENCH POLYNESIA	1991	174	0	174	0	0	0	0.87	62
GABON	1991	403	0	171	216	16	0	0.42	85
GAMBIA	1991	54	0	54	0	0	0	0.06	0
GEORGIA	1991
GERMANY	1991	262065	119952	101053	36072	4678	310	3.28	5145
GHANA	1991	1103	2	999	0	102	0	0.07	21
GIBRALTAR	1991	29	0	29	0	0	0	1.04	397
GREECE	1991	18439	8337	8411	84	1606	1	1.8	2639
GREENLAND	1991	150	0	150	0	0	0	2.69	0
GRENADA	1991	33	0	33	0	0	0	0.35	1
GUADELOUPE	1991	371	0	338	0	33	0	0.95	74
GUATEMALA	1991	1378	0	1177	4	196	0	0.15	0
GUINEA	1991	293	0	293	0	0	0	0.05	10
GUINEA BISSAU	1991	70	0	70	0	0	0	0.07	5
GUYANA	1991	306	0	306	0	0	0	0.41	11
HAITI	1991	272	18	220	0	34	0	0.04	28
HONDURAS	1991	736	0	642	0	94	0	0.15	0
HONG KONG SPECIAL ADMINSTRATIVE REGION OF CHINA	1991	7879	5332	2319	0	228	0	1.36	2409
HUNGARY	1991	17299	5966	6008	4981	344	0	1.67	108
ICELAND	1991	552	67	471	0	14	0	2.14	53
INDIA	1991	201214	140288	45421	6431	6936	2138	0.23	723
INDONESIA	1991	49013	3690	28237	11871	2197	3019	0.27	398
IRAQ	1991	12932	1	11262	963	680	26	0.7	0
IRELAND	1991	9029	3519	4095	1197	218	0	2.56	308
ISLAMIC REPUBLIC OF IRAN	1991	63743	1128	42303	12182	2040	6090	1.1	2373
ISRAEL	1991	9358	3009	5852	13	483	0	2.01	877
ITALY (INCLUDING SAN MARINO)	1991	118346	13691	72459	26647	5550	0	2.07	4097
JAMAICA	1991	2229	37	2140	0	52	0	0.94	26
JAPAN	1991	300136	81349	177570	29036	12181	0	2.43	8727
JORDAN	1991	2672	0	2487	0	185	0	0.78	92
KAZAKHSTAN	1991
KENYA	1991	1320	96	1030	0	194	0	0.05	109
KIRIBATI	1991	6	0	6	0	0	0	0.08	0
KUWAIT	1991	2885	0	2476	392	13	4	1.38	114
KUWAITI OIL FIRES	1991	130438	0	123118	0	0	7320	.	0
KYRGYZSTAN	1991
LAO PEOPLE S DEMOCRATIC REPUBLIC	1991	69	1	69	0	0	0	0.02	0
LATVIA	1991
LEBANON	1991	2590	0	2468	0	122	0	0.85	77
LIBERIA	1991	78	0	78	0	0	0	0.04	14
LIBYAN ARAB JAMAHIRIYAH	1991	11587	4	6731	2598	322	1932	2.6	265
LITHUANIA	1991
LUXEMBOURG	1991	2899	1099	1427	279	94	0	7.5	114
MACAU SPECIAL ADMINSTRATIVE REGION OF CHINA	1991	298	0	298	0	0	0	0.78	0
MACEDONIA	1991
MADAGASCAR	1991	293	9	275	0	8	0	0.03	12
MALAWI	1991	180	8	156	0	16	0	0.02	11
MALAYSIA	1991	18705	1657	11516	3628	1013	890	1.01	96
MALDIVES	1991	47	0	47	0	0	0	0.21	0
MALI	1991	119	0	116	0	3	0	0.01	12
MALTA	1991	600	184	416	0	0	0	1.65	77
MARSHALL ISLANDS	1991	14	0	14	0	0	0	0.29	0
MARTINIQUE	1991	504	0	471	0	33	0	1.39	23
MAURITANIA	1991	750	4	732	0	14	0	0.37	18
MAURITIUS	1991	415	48	368	0	0	0	0.39	94
MEXICO	1991	91788	3055	69573	15084	3414	662	1.08	1947
MONGOLIA	1991	3329	2776	522	0	31	0	1.48	0
MONTENEGRO	1991
MONTSERRAT	1991	9	0	9	0	0	0	0.86	1
MOROCCO	1991	6811	1478	4527	20	785	0	0.27	62
MOZAMBIQUE	1991	280	45	224	0	11	0	0.02	52
MYANMAR (FORMERLY BURMA)	1991	1140	79	551	448	60	2	0.03	28
NAMIBIA	1991	4	0	4	0	0	0	0	0
NAURU	1991	36	0	36	0	0	0	3.85	4
NEPAL	1991	262	49	196	0	18	0	0.01	0
NETHERLAND ANTILLES	1991	1403	0	1403	0	0	0	7.33	1513
NETHERLANDS	1991	47097	7606	17438	21518	482	53	3.13	11147
NEW CALEDONIA	1991	488	127	348	0	12	0	2.79	21
NEW ZEALAND	1991	6670	1161	2758	2641	78	33	1.94	597
NICARAGUA	1991	564	0	531	0	33	0	0.13	0
NIGER	1991	224	89	131	0	3	0	0.03	10
NIGERIA	1991	12339	76	9298	2489	476	0	0.12	646
NIUE	1991	1	0	1	0	0	0	0.37	0
NORWAY	1991	8733	812	6444	1126	156	195	2.05	403
OCCUPIED PALESTINIAN TERRITORY	1991
OMAN	1991	2986	0	1299	1217	135	336	1.56	457
PACIFIC ISLANDS (PALAU)	1991	64	0	64	0	0	0	1.38	13
PAKISTAN	1991	18610	2190	8819	6546	1056	0	0.16	141
PALAU	1991
PANAMA	1991	925	35	817	31	41	0	0.38	0
PAPUA NEW GUINEA	1991	563	1	522	41	0	0	0.13	25
PARAGUAY	1991	609	0	565	0	44	0	0.14	2
PERU	1991	5568	264	4588	323	299	94	0.25	179
PHILIPPINES	1991	12498	1699	9859	0	940	0	0.2	368
PLURINATIONAL STATE OF BOLIVIA	1991	1576	0	983	262	81	250	0.23	0
POLAND	1991	98607	83117	9391	4466	1634	0	2.58	367
PORTUGAL	1991	13155	3015	9124	0	1016	0	1.32	954
QATAR	1991	4820	0	824	3924	72	0	10	0
REPUBLIC OF CAMEROON	1991	303	1	231	0	71	0	0.02	12
REPUBLIC OF KOREA	1991	73202	26320	40154	1969	4760	0	1.69	2474
REPUBLIC OF MOLDOVA	1991
REUNION	1991	469	0	469	0	0	0	0.76	9
ROMANIA	1991	37505	10468	12635	13493	910	0	1.62	0
RUSSIAN FEDERATION	1991
RWANDA	1991	172	0	163	0	8	0	0.02	8
SAINT HELENA	1991	2	0	2	0	0	0	0.3	0
SAINT LUCIA	1991	47	0	47	0	0	0	0.33	0
SAMOA	1991	34	0	34	0	0	0	0.21	0
SAO TOME & PRINCIPE	1991	19	0	19	0	0	0	0.16	0
SAUDI ARABIA	1991	73214	0	41002	30430	1546	236	4.37	4948
SENEGAL	1991	934	0	864	2	68	0	0.12	121
SERBIA	1991
SEYCHELLES	1991	39	0	39	0	0	0	0.53	90
SIERRA LEONE	1991	128	0	128	0	0	0	0.03	81
SINGAPORE	1991	12933	12	12649	0	272	0	4.18	10163
SLOVAKIA	1991
SLOVENIA	1991
SOLOMON ISLANDS	1991	44	0	44	0	0	0	0.14	2
SOMALIA	1991	1	0	0	0	1	0	0	0
SOUTH AFRICA	1991	94447	75795	16689	953	1010	0	2.51	0
SPAIN	1991	64107	20857	36222	3578	3416	34	1.65	4608
SRI LANKA	1991	1108	2	1052	0	54	0	0.06	300
ST. KITTS-NEVIS	1991	20	0	20	0	0	0	0.49	0
ST. PIERRE & MIQUELON	1991	28	0	28	0	0	0	4.52	38
ST. VINCENT & THE GRENADINES	1991	21	0	21	0	0	0	0.19	0
SUDAN	1991	1469	0	1446	0	23	0	0.05	33
SURINAME	1991	573	0	566	0	7	0	1.39	0
SWAZILAND	1991	89	89	0	0	0	0	0.1	0
SWEDEN	1991	15108	2812	11624	347	326	0	1.75	932
SWITZERLAND	1991	11549	331	9304	1275	639	0	1.69	810
SYRIAN ARAB REPUBLIC	1991	11779	1	8943	998	476	1361	0.9	268
TAIWAN	1991	37382	12567	20632	1546	2638	0	1.81	1224
TAJIKISTAN	1991
THAILAND	1991	31674	7238	18211	3770	2455	0	0.55	0
TIMOR-LESTE (FORMERLY EAST TIMOR)	1991
TOGO	1991	230	0	177	0	53	0	0.06	3
TONGA	1991	25	0	25	0	0	0	0.26	3
TRINIDAD AND TOBAGO	1991	5740	0	1793	3140	66	741	4.68	0
TUNISIA	1991	4224	74	3070	512	545	23	0.5	68
TURKEY	1991	41396	18611	17050	2179	3548	8	0.73	309
TURKMENISTAN	1991
TURKS AND CAICOS ISLANDS	1991
UGANDA	1991	232	0	225	0	7	0	0.01	0
UKRAINE	1991
UNITED ARAB EMIRATES	1991	15547	0	4759	10043	472	273	7.9	257
UNITED KINGDOM	1991	161933	65939	62239	32084	1672	0	2.81	5173
UNITED REPUBLIC OF TANZANIA	1991	664	3	589	0	73	0	0.03	42
UNITED STATES OF AMERICA	1991	1328126	475111	553177	287999	9311	2527	5.07	33644
URUGUAY	1991	1242	1	1174	0	68	0	0.4	180
USSR	1991	997905	300724	353542	320069	17272	6298	3.43	0
UZBEKISTAN	1991
VANUATU	1991	18	0	18	0	0	0	0.12	0
VENEZUELA	1991	31481	311	16493	11757	862	2059	1.56	793
VIET NAM	1991	5850	3265	2176	1	408	0	0.09	0
WALLIS AND FUTUNA ISLANDS	1991
WESTERN SAHARA	1991	54	0	54	0	0	0	0.23	3
YEMEN	1991	2757	0	2641	0	116	0	0.21	189
YUGOSLAVIA (FORMER SOCIALIST FEDERAL REPUBLIC)	1991	25710	10916	11108	2631	1020	34	1.08	0
YUGOSLAVIA (MONTENEGRO & SERBIA)	1991
ZAMBIA	1991	659	229	380	0	50	0	0.08	30
ZIMBABWE	1991	4315	3486	711	0	118	0	0.4	45
Total (in Pg C or Gt C)	1991	6.13174	2.34678	2.52091	1.05927	0.16072	0.044064		0.135768

## Sheet: CDIAC Nations 1992
National CO2 Emissions from Fossil-Fuel Burning, Cement Manufacture, and Gas Flaring: 1992
WS 5
Created:		M. Jonas								16 June 2009
Modified:		M. Jonas								15 February 2012
Source:		Global, Regional, and National Fossil-Fuel CO2 Emissions								doi: 10.3334/CDIAC/00001_V2011
		Carbon Dioxide Information Analysis Center, Oak Ridge National Laboratory, Oak Ridge, Tennessee 37831–6335, USA								http://cdiac.ornl.gov/trends/emis/overview_2008.html
Authors:		T.A. Boden, G. Marland and R.J. Andres
Remarks:		1. Annual sums were tallied before each element was rounded and reported by the authors so totals may differ slightly from the sum of the elements due to rounding.
Nation	Year	Total CO2 emissions from fossil-fuels	Emissions from solid fuel consumption	Emissions from liquid fuel consumption	Emissions from gas fuel consumption	Emissions from cement production	Emissions from gas flaring	Per capita carbon emissions	Emissions from bunker fuels
		103 t C	103 t C	103 t C	103 t C	103 t C	103 t C	t C / cap	103 t C
AFGHANISTAN	1992	389	6	262	99	16	6	0.03	5
ALBANIA	1992	651	218	351	54	27	0	0.2	0
ALGERIA	1992	22433	768	8287	8715	870	3793	0.85	274
ANDORRA	1992
ANGOLA	1992	1205	0	413	291	41	460	0.11	349
ANGUILLA	1992
ANTARCTIC FISHERIES	1992	4	0	4	0	0	0	4.19	56
ANTIGUA & BARBUDA	1992	80	0	80	0	0	0	1.26	30
ARGENTINA	1992	33119	765	17367	13183	687	1116	0.99	415
ARMENIA	1992	1004	102	0	848	54	0	0.29	0
ARUBA	1992	470	0	470	0	0	0	6.82	0
AUSTRALIA	1992	80299	48980	21504	8958	736	122	4.58	1823
AUSTRIA	1992	16507	3517	8992	3314	684	0	2.12	168
AZERBAIJAN	1992	12046	20	5229	6168	109	520	1.62	378
BAHAMAS	1992	489	1	487	0	0	0	1.84	189
BAHRAIN	1992	2888	0	146	2712	30	0	5.48	0
BANGLADESH	1992	4840	88	2093	2622	37	0	0.04	0
BARBADOS	1992	267	0	232	11	24	0	1.03	76
BELARUS	1992	23858	2149	12862	8534	313	0	2.32	0
BELGIUM	1992	31190	9818	14621	5652	1098	0	3.12	4434
BELIZE	1992	97	0	97	0	0	0	0.48	13
BENIN	1992	247	0	197	0	50	0	0.05	15
BERMUDA	1992	111	0	111	0	0	0	1.83	13
BHUTAN	1992	59	22	22	0	16	0	0.11	0
BOSNIA & HERZEGOVINA	1992	1074	458	449	148	20	0	0.27	0
BOTSWANA	1992	899	659	240	0	0	0	0.63	0
BRAZIL	1992	60187	10756	43516	2128	3251	535	0.39	1099
BRITISH VIRGIN ISLANDS	1992	14	0	14	0	0	0	0.82	0
BRUNEI (DARUSSALAM)	1992	1584	0	507	765	0	312	5.83	0
BULGARIA	1992	14617	8251	3791	2285	290	0	1.69	235
BURKINA FASO	1992	172	0	172	0	0	0	0.02	0
BURUNDI	1992	87	5	82	0	0	0	0.01	4
CAMBODIA	1992	130	0	130	0	0	0	0.01	0
CANADA	1992	127529	27629	56882	41025	775	1218	4.49	1234
CAPE VERDE	1992	28	0	28	0	0	0	0.07	4
CAYMAN ISLANDS	1992	76	0	76	0	0	0	2.65	5
CENTRAL AFRICAN REPUBLIC	1992	59	0	59	0	0	0	0.02	10
CHAD	1992	24	0	24	0	0	0	0	14
CHILE	1992	9304	2035	5924	920	360	66	0.68	279
CHINA (MAINLAND)	1992	735201	577161	107869	8253	41918	0	0.63	0
COLOMBIA	1992	16921	3730	9730	2283	926	252	0.49	122
COMOROS	1992	21	0	21	0	0	0	0.05	0
CONGO	1992	429	0	339	28	16	46	0.17	7
COOK ISLANDS	1992	6	0	6	0	0	0	0.32	7
COSTA RICA	1992	1034	0	939	0	95	0	0.32	0
COTE D IVOIRE	1992	1261	0	1192	0	69	0	0.09	137
CROATIA	1992	4484	473	2594	1177	240	0	0.98	0
CUBA	1992	8546	34	8229	11	272	0	0.8	174
CYPRUS	1992	1439	19	1266	0	154	0	2.06	262
CZECH REPUBLIC	1992	38043	27871	6095	3260	816	0	3.69	138
CZECHOSLOVAKIA	1992
DEMOCRATIC PEOPLE S REPUBLIC OF KOREA	1992	69652	63957	3382	0	2312	0	3.35	0
DEMOCRATIC REPUBLIC OF THE CONGO (FORMERLY ZAIRE)	1992	987	218	744	0	24	0	0.02	115
DENMARK	1992	14870	7006	6252	1197	282	133	2.88	1253
DJIBOUTI	1992	113	0	113	0	0	0	0.19	258
DOMINICA	1992	16	0	16	0	0	0	0.23	0
DOMINICAN REPUBLIC	1992	3056	101	2770	0	186	0	0.4	0
ECUADOR	1992	6082	0	5283	127	306	366	0.57	198
EGYPT	1992	22161	707	14743	4399	2312	0	0.37	1154
EL SALVADOR	1992	935	0	878	0	57	0	0.17	0
EQUATORIAL GUINEA	1992	59	0	59	0	0	0	0.15	0
ERITREA	1992
ESTONIA	1992	6280	4691	1096	411	82	0	4.11	150
ETHIOPIA	1992	809	0	768	0	41	0	0.02	59
FAEROE ISLANDS	1992	180	0	180	0	0	0	3.93	0
FALKLAND ISLANDS (MALVINAS)	1992	10	4	7	0	0	0	4.81	0
FEDERAL REPUBLIC OF GERMANY	1992
FEDERATED STATES OF MICRONESIA	1992
FIJI	1992	200	14	175	0	11	0	0.27	48
FINLAND	1992	13397	5154	6595	1494	154	0	2.66	822
FORMER DEMOCRATIC YEMEN	1992
FORMER GERMAN DEMOCRATIC REPUBLIC	1992
FORMER YEMEN	1992
FRANCE (INCLUDING MONACO)	1992	108273	19512	67333	18550	2878	0	1.89	5078
FRENCH GUIANA	1992	240	0	240	0	0	0	1.91	13
FRENCH POLYNESIA	1992	176	0	176	0	0	0	0.86	62
GABON	1992	581	0	341	225	16	0	0.59	386
GAMBIA	1992	54	0	54	0	0	0	0.06	0
GEORGIA	1992	4182	264	1377	2472	68	0	0.78	12
GERMANY	1992	253157	110372	101953	35521	5104	207	3.15	5039
GHANA	1992	1117	2	975	0	139	0	0.07	22
GIBRALTAR	1992	25	0	25	0	0	0	0.88	734
GREECE	1992	20590	8751	10310	77	1451	1	1.99	2949
GREENLAND	1992	132	0	132	0	0	0	2.37	0
GRENADA	1992	35	0	35	0	0	0	0.36	2
GUADELOUPE	1992	389	0	357	0	32	0	0.99	68
GUATEMALA	1992	1641	0	1446	5	190	0	0.18	0
GUINEA	1992	293	0	293	0	0	0	0.04	10
GUINEA BISSAU	1992	71	0	71	0	0	0	0.07	5
GUYANA	1992	287	0	287	0	0	0	0.38	10
HAITI	1992	248	19	202	0	27	0	0.03	17
HONDURAS	1992	839	0	751	0	88	0	0.16	0
HONG KONG SPECIAL ADMINSTRATIVE REGION OF CHINA	1992	9116	5653	3240	0	223	0	1.55	3174
HUNGARY	1992	16012	5555	5785	4367	304	0	1.55	114
ICELAND	1992	516	48	454	0	14	0	1.99	79
INDIA	1992	213699	147161	51325	7439	6800	973	0.24	735
INDONESIA	1992	55243	3414	31961	14294	2350	3223	0.3	404
IRAQ	1992	16818	0	15325	1189	272	31	0.88	0
IRELAND	1992	8523	3472	3647	1186	218	0	2.41	266
ISLAMIC REPUBLIC OF IRAN	1992	67486	950	45440	13097	2067	5932	1.14	1301
ISRAEL	1992	11317	3662	7105	11	539	0	2.34	589
ITALY (INCLUDING SAN MARINO)	1992	118069	12614	74154	25678	5623	0	2.07	3888
JAMAICA	1992	2208	48	2096	0	65	0	0.92	38
JAPAN	1992	306425	79613	185097	29713	12002	0	2.47	8840
JORDAN	1992	3345	0	2853	67	426	0	0.91	168
KAZAKHSTAN	1992	71259	40217	20868	9304	870	0	4.34	840
KENYA	1992	1511	115	1191	0	205	0	0.06	120
KIRIBATI	1992	6	0	6	0	0	0	0.08	0
KUWAIT	1992	4803	0	2436	2033	72	262	2.41	298
KUWAITI OIL FIRES	1992
KYRGYZSTAN	1992	2962	945	1028	839	150	0	0.66	51
LAO PEOPLE S DEMOCRATIC REPUBLIC	1992	76	1	75	0	1	0	0.02	0
LATVIA	1992	3832	565	2243	970	54	0	1.47	0
LEBANON	1992	3097	0	2893	0	204	0	0.98	86
LIBERIA	1992	79	0	78	0	1	0	0.04	14
LIBYAN ARAB JAMAHIRIYAH	1992	11064	4	7093	2583	313	1071	2.43	150
LITHUANIA	1992	6041	498	3773	1567	204	0	1.64	0
LUXEMBOURG	1992	3219	1324	1522	291	82	0	8.22	110
MACAU SPECIAL ADMINSTRATIVE REGION OF CHINA	1992	296	0	296	0	0	0	0.76	0
MACEDONIA	1992	2939	1965	903	0	70	0	1.52	0
MADAGASCAR	1992	285	9	268	0	8	0	0.02	12
MALAWI	1992	179	9	156	0	15	0	0.02	11
MALAYSIA	1992	20534	1726	12436	4368	1138	867	1.08	65
MALDIVES	1992	69	0	69	0	0	0	0.3	0
MALI	1992	121	0	118	0	3	0	0.01	13
MALTA	1992	616	185	430	0	0	0	1.68	86
MARSHALL ISLANDS	1992	15	0	15	0	0	0	0.3	0
MARTINIQUE	1992	560	0	527	0	33	0	1.54	24
MAURITANIA	1992	803	4	782	0	17	0	0.38	19
MAURITIUS	1992	466	52	414	0	0	0	0.43	100
MEXICO	1992	93436	3797	70117	15178	3656	688	1.08	1765
MONGOLIA	1992	3021	2510	494	0	18	0	1.34	0
MONTENEGRO	1992
MONTSERRAT	1992	10	0	10	0	0	0	0.92	1
MOROCCO	1992	7101	1266	4961	13	862	0	0.28	98
MOZAMBIQUE	1992	273	43	225	0	4	0	0.02	51
MYANMAR (FORMERLY BURMA)	1992	1333	33	793	441	63	3	0.03	25
NAMIBIA	1992	4	0	4	0	0	0	0	0
NAURU	1992	37	0	37	0	0	0	3.86	4
NEPAL	1992	363	82	250	0	32	0	0.02	0
NETHERLAND ANTILLES	1992	1183	0	1183	0	0	0	6.16	1513
NETHERLANDS	1992	45845	7576	16971	20793	449	56	3.03	11491
NEW CALEDONIA	1992	483	123	348	0	12	0	2.69	21
NEW ZEALAND	1992	7137	1324	2910	2799	79	24	2.04	591
NICARAGUA	1992	679	0	641	0	38	0	0.16	0
NIGER	1992	214	76	134	0	4	0	0.03	9
NIGERIA	1992	17694	68	14531	2618	476	0	0.17	637
NIUE	1992	1	0	1	0	0	0	0.38	0
NORWAY	1992	8093	828	5534	1390	172	169	1.89	489
OCCUPIED PALESTINIAN TERRITORY	1992
OMAN	1992	3299	0	1134	1707	132	326	1.67	477
PACIFIC ISLANDS (PALAU)	1992
PAKISTAN	1992	19850	2282	9545	6964	1060	0	0.16	135
PALAU	1992	31	0	31	0	0	0	1.97	13
PANAMA	1992	1095	35	995	31	34	0	0.44	0
PAPUA NEW GUINEA	1992	560	1	519	41	0	0	0.13	24
PARAGUAY	1992	715	0	671	0	44	0	0.16	2
PERU	1992	5560	286	4644	346	284	0	0.25	180
PHILIPPINES	1992	13723	1612	11204	0	907	0	0.21	433
PLURINATIONAL STATE OF BOLIVIA	1992	1813	0	1070	355	82	306	0.26	0
POLAND	1992	97432	81779	9624	4410	1619	0	2.54	445
PORTUGAL	1992	14282	3057	10187	0	1039	0	1.43	977
QATAR	1992	7309	0	1216	6019	74	0	14.79	0
REPUBLIC OF CAMEROON	1992	1035	1	950	0	84	0	0.08	13
REPUBLIC OF KOREA	1992	78148	23714	45855	2535	6044	0	1.79	3151
REPUBLIC OF MOLDOVA	1992	5719	1094	2621	1909	95	0	1.31	0
REUNION	1992	471	0	471	0	0	0	0.75	3
ROMANIA	1992	34105	11286	10052	11914	853	0	1.48	0
RUSSIAN FEDERATION	1992	605596	166472	200527	226466	8391	3740	4.07	0
RWANDA	1992	174	0	165	0	8	1	0.03	7
SAINT HELENA	1992	2	0	2	0	0	0	0.31	0
SAINT LUCIA	1992	56	0	56	0	0	0	0.39	0
SAMOA	1992	35	0	35	0	0	0	0.21	0
SAO TOME & PRINCIPE	1992	20	0	20	0	0	0	0.17	0
SAUDI ARABIA	1992	78213	0	45000	30982	2084	147	4.56	3890
SENEGAL	1992	949	0	866	1	82	0	0.12	133
SERBIA	1992
SEYCHELLES	1992	45	0	45	0	0	0	0.61	91
SIERRA LEONE	1992	129	0	129	0	0	0	0.03	83
SINGAPORE	1992	13708	18	13182	250	258	0	4.31	12330
SLOVAKIA	1992	12448	6280	2775	3052	340	0	2.35	0
SLOVENIA	1992	3537	1612	1432	384	109	0	1.82	0
SOLOMON ISLANDS	1992	44	0	44	0	0	0	0.13	2
SOMALIA	1992	3	0	0	0	3	0	0	0
SOUTH AFRICA	1992	88588	70870	15802	960	956	0	2.3	0
SPAIN	1992	66839	21340	38445	3672	3348	34	1.71	4379
SRI LANKA	1992	1379	1	1267	0	111	0	0.08	286
ST. KITTS-NEVIS	1992	20	0	20	0	0	0	0.49	0
ST. PIERRE & MIQUELON	1992	26	0	26	0	0	0	4.12	36
ST. VINCENT & THE GRENADINES	1992	23	0	23	0	0	0	0.21	0
SUDAN	1992	1297	0	1263	0	34	0	0.05	33
SURINAME	1992	576	0	569	0	7	0	1.38	0
SWAZILAND	1992	72	72	0	0	0	0	0.08	0
SWEDEN	1992	15580	2663	12215	392	311	0	1.8	1066
SWITZERLAND	1992	11815	220	9813	1203	579	0	1.71	880
SYRIAN ARAB REPUBLIC	1992	12118	1	8977	1032	503	1605	0.9	226
TAIWAN	1992	40273	14707	20956	1666	2944	0	1.94	1681
TAJIKISTAN	1992	1969	248	789	879	54	0	0.36	13
THAILAND	1992	34587	7729	19850	4040	2969	0	0.59	0
TIMOR-LESTE (FORMERLY EAST TIMOR)	1992
TOGO	1992	228	0	180	0	48	0	0.06	4
TONGA	1992	24	0	24	0	0	0	0.25	3
TRINIDAD AND TOBAGO	1992	5723	0	1746	3111	66	800	4.63	0
TUNISIA	1992	4097	76	2715	705	544	56	0.48	67
TURKEY	1992	42131	17505	18343	2383	3891	9	0.73	312
TURKMENISTAN	1992	7654	195	3866	3443	150	0	1.97	0
TURKS AND CAICOS ISLANDS	1992
UGANDA	1992	235	0	228	0	7	0	0.01	0
UKRAINE	1992	174988	83382	35558	53315	2734	0	3.39	606
UNITED ARAB EMIRATES	1992	15854	0	5615	9280	517	441	7.66	257
UNITED KINGDOM	1992	160200	61952	63075	33676	1497	0	2.77	5444
UNITED REPUBLIC OF TANZANIA	1992	644	3	568	0	73	0	0.02	42
UNITED STATES OF AMERICA	1992	1329699	482750	539329	295483	9640	2497	5.02	39201
URUGUAY	1992	1410	1	1341	0	68	0	0.45	238
USSR	1992
UZBEKISTAN	1992	31092	2183	7134	20973	802	0	1.45	0
VANUATU	1992	18	0	18	0	0	0	0.11	0
VENEZUELA	1992	28872	336	20107	5278	896	2255	1.4	722
VIET NAM	1992	6105	2988	2574	0	544	0	0.09	0
WALLIS AND FUTUNA ISLANDS	1992
WESTERN SAHARA	1992	54	0	54	0	0	0	0.23	3
YEMEN	1992	3922	0	3813	0	109	0	0.29	180
YUGOSLAVIA (FORMER SOCIALIST FEDERAL REPUBLIC)	1992
YUGOSLAVIA (MONTENEGRO & SERBIA)	1992	12367	9269	1399	1421	277	0	1.19	51
ZAMBIA	1992	670	238	385	0	47	0	0.08	30
ZIMBABWE	1992	4609	3688	799	0	122	0	0.42	0
Total (in Pg C or Gt C)	1992	6.04294	2.35579	2.39462	1.09043	0.167436	0.034669		0.146872
EU-15 (in Pg C or Gt C)	1992	0.892109
EU-27 w/o CY and MT (in Pg C or Gt C)	1992	1.12446

## Sheet: CDIAC Nations 1993
National CO2 Emissions from Fossil-Fuel Burning, Cement Manufacture, and Gas Flaring: 1993
WS 6
Created:		M. Jonas								16 June 2009
Modified:		M. Jonas								15 February 2012
Source:		Global, Regional, and National Fossil-Fuel CO2 Emissions								doi: 10.3334/CDIAC/00001_V2011
		Carbon Dioxide Information Analysis Center, Oak Ridge National Laboratory, Oak Ridge, Tennessee 37831–6335, USA								http://cdiac.ornl.gov/trends/emis/overview_2008.html
Authors:		T.A. Boden, G. Marland and R.J. Andres
Remarks:		1. Annual sums were tallied before each element was rounded and reported by the authors so totals may differ slightly from the sum of the elements due to rounding.
Nation	Year	Total CO2 emissions from fossil-fuels	Emissions from solid fuel consumption	Emissions from liquid fuel consumption	Emissions from gas fuel consumption	Emissions from cement production	Emissions from gas flaring	Per capita carbon emissions	Emissions from bunker fuels
		103 t C	103 t C	103 t C	103 t C	103 t C	103 t C	t C / cap	103 t C
AFGHANISTAN	1993	375	5	252	96	16	6	0.02	5
ALBANIA	1993	639	164	406	43	27	0	0.2	0
ALGERIA	1993	22491	597	7640	9852	870	3532	0.83	422
ANDORRA	1993
ANGOLA	1993	1582	0	817	286	34	445	0.13	251
ANGUILLA	1993
ANTARCTIC FISHERIES	1993	4	0	4	0	0	0	4.19	56
ANTIGUA & BARBUDA	1993	84	0	84	0	0	0	1.29	32
ARGENTINA	1993	32345	628	18327	11137	768	1484	0.96	332
ARMENIA	1993	799	2	350	419	27	0	0.24	0
ARUBA	1993	483	0	483	0	0	0	6.62	0
AUSTRALIA	1993	82388	47991	24215	9321	748	114	4.65	1976
AUSTRIA	1993	15875	3136	8557	3510	672	0	2.02	164
AZERBAIJAN	1993	11804	3	7002	4717	82	0	1.56	203
BAHAMAS	1993	468	1	466	0	0	0	1.73	191
BAHRAIN	1993	4129	0	684	3414	31	0	7.58	0
BANGLADESH	1993	4747	33	1841	2836	37	0	0.04	0
BARBADOS	1993	304	0	282	14	8	0	1.17	69
BELARUS	1993	20303	1864	10258	7923	258	0	1.97	0
BELGIUM	1993	29704	8646	14148	5875	1035	0	2.96	4467
BELIZE	1993	103	0	103	0	0	0	0.5	9
BENIN	1993	309	0	240	0	69	0	0.06	16
BERMUDA	1993	131	0	131	0	0	0	2.15	13
BHUTAN	1993	51	12	24	0	15	0	0.1	0
BOSNIA & HERZEGOVINA	1993	892	343	392	136	20	0	0.24	0
BOTSWANA	1993	957	652	306	0	0	0	0.65	0
BRAZIL	1993	62923	11029	45589	2324	3379	602	0.4	1304
BRITISH VIRGIN ISLANDS	1993	14	0	14	0	0	0	0.8	0
BRUNEI (DARUSSALAM)	1993	1524	0	606	756	0	161	5.45	0
BULGARIA	1993	18906	8759	7739	2136	273	0	2.21	171
BURKINA FASO	1993	171	0	171	0	0	0	0.02	0
BURUNDI	1993	92	5	87	0	0	0	0.02	5
CAMBODIA	1993	130	0	130	0	0	0	0.01	0
CANADA	1993	130330	25502	59603	43088	907	1230	4.54	1156
CAPE VERDE	1993	28	0	28	0	0	0	0.07	4
CAYMAN ISLANDS	1993	79	0	79	0	0	0	2.61	8
CENTRAL AFRICAN REPUBLIC	1993	61	0	61	0	0	0	0.02	10
CHAD	1993	27	0	27	0	0	0	0	15
CHILE	1993	9896	2082	6473	876	411	54	0.71	316
CHINA (MAINLAND)	1993	785027	608282	116962	9751	50032	0	0.66	2250
COLOMBIA	1993	17459	3877	9835	2359	1078	309	0.5	102
COMOROS	1993	21	0	21	0	0	0	0.04	0
CONGO	1993	421	0	304	55	16	46	0.16	7
COOK ISLANDS	1993	6	0	6	0	0	0	0.32	7
COSTA RICA	1993	1078	0	961	0	117	0	0.33	0
COTE D IVOIRE	1993	1607	0	1539	0	68	0	0.11	139
CROATIA	1993	4480	407	2604	1240	229	0	0.97	27
CUBA	1993	8003	51	7797	12	143	0	0.74	169
CYPRUS	1993	1545	22	1375	0	148	0	2.18	240
CZECH REPUBLIC	1993	35987	26506	5416	3332	733	0	3.49	115
CZECHOSLOVAKIA	1993
DEMOCRATIC PEOPLE S REPUBLIC OF KOREA	1993	71486	65967	3207	0	2312	0	3.39	0
DEMOCRATIC REPUBLIC OF THE CONGO (FORMERLY ZAIRE)	1993	930	223	687	0	20	0	0.02	117
DENMARK	1993	15636	7545	6300	1366	309	115	3.01	1628
DJIBOUTI	1993	117	0	117	0	0	0	0.2	251
DOMINICA	1993	17	0	17	0	0	0	0.24	0
DOMINICAN REPUBLIC	1993	3256	87	2997	0	173	0	0.42	0
ECUADOR	1993	6596	0	5759	146	285	406	0.6	198
EGYPT	1993	25404	932	17244	5052	2176	0	0.41	1484
EL SALVADOR	1993	1061	0	944	0	117	0	0.19	0
EQUATORIAL GUINEA	1993	28	0	28	0	0	0	0.07	3
ERITREA	1993
ESTONIA	1993	5080	3486	1325	202	68	0	3.39	83
ETHIOPIA	1993	1408	0	1360	0	48	0	0.03	56
FAEROE ISLANDS	1993	163	0	163	0	0	0	3.65	0
FALKLAND ISLANDS (MALVINAS)	1993	10	4	7	0	0	0	4.61	0
FEDERAL REPUBLIC OF GERMANY	1993
FEDERATED STATES OF MICRONESIA	1993
FIJI	1993	211	14	185	0	11	0	0.28	48
FINLAND	1993	14163	5755	6743	1551	114	0	2.8	683
FORMER DEMOCRATIC YEMEN	1993
FORMER GERMAN DEMOCRATIC REPUBLIC	1993
FORMER YEMEN	1993
FRANCE (INCLUDING MONACO)	1993	106110	15478	67610	20239	2783	0	1.84	5010
FRENCH GUIANA	1993	239	0	239	0	0	0	1.84	14
FRENCH POLYNESIA	1993	177	0	177	0	0	0	0.85	62
GABON	1993	895	0	436	441	18	0	0.88	374
GAMBIA	1993	57	0	57	0	0	0	0.06	0
GEORGIA	1993	2714	174	617	1882	41	0	0.52	9
GERMANY	1993	248548	103953	102114	37310	4984	188	3.07	5579
GHANA	1993	1272	2	1106	0	164	0	0.08	23
GIBRALTAR	1993	91	0	91	0	0	0	3.2	737
GREECE	1993	20629	8769	10086	57	1716	1	1.97	3529
GREENLAND	1993	137	0	137	0	0	0	2.47	0
GRENADA	1993	39	0	39	0	0	0	0.39	2
GUADELOUPE	1993	396	0	365	0	31	0	1	63
GUATEMALA	1993	1543	0	1386	5	152	0	0.16	0
GUINEA	1993	301	0	301	0	0	0	0.04	11
GUINEA BISSAU	1993	76	0	76	0	0	0	0.07	5
GUYANA	1993	288	0	288	0	0	0	0.38	10
HAITI	1993	181	0	167	0	14	0	0.02	9
HONDURAS	1993	777	0	679	0	98	0	0.15	0
HONG KONG SPECIAL ADMINSTRATIVE REGION OF CHINA	1993	9580	6548	2799	0	233	0	1.6	3447
HUNGARY	1993	16396	5401	5970	4681	344	0	1.59	104
ICELAND	1993	543	47	484	0	12	0	2.07	76
INDIA	1993	222061	155362	51004	7368	7318	1010	0.24	684
INDONESIA	1993	59613	5816	32047	15737	2575	3439	0.32	464
IRAQ	1993	18217	0	16583	1336	272	26	0.93	0
IRELAND	1993	8532	3296	3692	1347	197	0	2.4	402
ISLAMIC REPUBLIC OF IRAN	1993	62634	916	45203	9510	2176	4830	1.04	732
ISRAEL	1993	12312	4185	7498	12	617	0	2.46	683
ITALY (INCLUDING SAN MARINO)	1993	115266	11124	73348	26201	4593	0	2.02	3927
JAMAICA	1993	2295	40	2194	0	61	0	0.95	34
JAPAN	1993	302338	80114	179779	30471	11974	0	2.43	9346
JORDAN	1993	3300	0	2744	79	478	0	0.85	193
KAZAKHSTAN	1993	60296	38206	14954	6591	544	0	3.7	279
KENYA	1993	1731	96	1443	0	193	0	0.07	142
KIRIBATI	1993	6	0	6	0	0	0	0.08	0
KUWAIT	1993	8011	0	3694	4144	68	105	4.29	559
KUWAITI OIL FIRES	1993
KYRGYZSTAN	1993	2265	852	686	632	95	0	0.5	14
LAO PEOPLE S DEMOCRATIC REPUBLIC	1993	76	1	75	0	1	0	0.02	0
LATVIA	1993	3291	510	2030	710	41	0	1.28	21
LEBANON	1993	3179	80	2691	0	408	0	0.97	94
LIBERIA	1993	88	0	87	0	1	0	0.05	14
LIBYAN ARAB JAMAHIRIYAH	1993	11627	3	7887	2516	313	908	2.5	162
LITHUANIA	1993	4771	445	3217	974	136	0	1.3	30
LUXEMBOURG	1993	2951	1071	1480	302	98	0	7.43	109
MACAU SPECIAL ADMINSTRATIVE REGION OF CHINA	1993	324	0	324	0	0	0	0.81	0
MACEDONIA	1993	2820	2068	684	0	68	0	1.45	0
MADAGASCAR	1993	292	10	274	0	8	0	0.02	11
MALAWI	1993	189	11	161	0	17	0	0.02	11
MALAYSIA	1993	25013	1470	14809	6012	1196	1526	1.28	54
MALDIVES	1993	59	0	59	0	0	0	0.25	0
MALI	1993	124	0	121	0	3	0	0.01	13
MALTA	1993	728	185	543	0	0	0	1.96	68
MARSHALL ISLANDS	1993	17	0	17	0	0	0	0.33	0
MARTINIQUE	1993	552	0	522	0	30	0	1.51	27
MAURITANIA	1993	808	4	789	0	15	0	0.38	19
MAURITIUS	1993	484	46	439	0	0	0	0.44	92
MEXICO	1993	93112	4268	69304	15206	3688	645	1.05	1847
MONGOLIA	1993	2540	2073	456	0	11	0	1.12	0
MONTENEGRO	1993
MONTSERRAT	1993	10	0	10	0	0	0	0.92	1
MOROCCO	1993	7695	1452	5367	13	864	0	0.29	64
MOZAMBIQUE	1993	294	43	248	0	3	0	0.02	32
MYANMAR (FORMERLY BURMA)	1993	1457	14	841	544	54	4	0.03	3
NAMIBIA	1993	5	0	5	0	0	0	0	0
NAURU	1993	37	0	37	0	0	0	3.79	4
NEPAL	1993	400	77	286	0	37	0	0.02	0
NETHERLAND ANTILLES	1993	1833	0	1833	0	0	0	9.53	1501
NETHERLANDS	1993	46946	8289	16833	21327	419	78	3.08	12005
NEW CALEDONIA	1993	483	123	348	0	12	0	2.63	21
NEW ZEALAND	1993	6957	1251	2846	2731	109	21	1.95	610
NICARAGUA	1993	628	0	593	0	35	0	0.14	0
NIGER	1993	240	89	147	0	4	0	0.03	9
NIGERIA	1993	16379	35	13049	2860	435	0	0.16	338
NIUE	1993	1	0	1	0	0	0	0.38	0
NORWAY	1993	8540	880	5838	1452	183	186	1.98	522
OCCUPIED PALESTINIAN TERRITORY	1993
OMAN	1993	3673	0	1155	2071	136	312	1.79	266
PACIFIC ISLANDS (PALAU)	1993
PAKISTAN	1993	21273	2310	10476	7355	1132	0	0.17	147
PALAU	1993	30	0	30	0	0	0	1.87	13
PANAMA	1993	1126	38	979	31	78	0	0.44	0
PAPUA NEW GUINEA	1993	544	1	502	42	0	0	0.12	24
PARAGUAY	1993	805	0	738	0	67	0	0.18	2
PERU	1993	6424	431	5290	364	340	0	0.28	202
PHILIPPINES	1993	13987	1679	11225	0	1083	0	0.21	446
PLURINATIONAL STATE OF BOLIVIA	1993	2192	0	1212	366	89	524	0.31	0
POLAND	1993	96133	79606	10232	4632	1663	0	2.5	351
PORTUGAL	1993	12946	3278	8632	0	1036	0	1.3	888
QATAR	1993	8378	0	1232	7072	74	0	16.6	0
REPUBLIC OF CAMEROON	1993	1063	1	979	0	84	0	0.08	15
REPUBLIC OF KOREA	1993	86470	26502	50301	3232	6435	0	1.96	3713
REPUBLIC OF MOLDOVA	1993	4262	1088	1736	1424	14	0	0.97	28
REUNION	1993	479	0	479	0	0	0	0.75	5
ROMANIA	1993	33306	10007	10996	11454	849	0	1.45	209
RUSSIAN FEDERATION	1993	553594	152092	174488	217281	6786	2947	3.72	0
RWANDA	1993	175	0	167	0	8	1	0.03	7
SAINT HELENA	1993	2	0	2	0	0	0	0.31	0
SAINT LUCIA	1993	62	0	62	0	0	0	0.43	0
SAMOA	1993	35	0	35	0	0	0	0.21	0
SAO TOME & PRINCIPE	1993	20	0	20	0	0	0	0.16	0
SAUDI ARABIA	1993	86056	0	51101	32675	2081	199	4.92	3930
SENEGAL	1993	980	0	893	7	80	0	0.12	129
SERBIA	1993
SEYCHELLES	1993	44	0	44	0	0	0	0.6	93
SIERRA LEONE	1993	138	0	138	0	0	0	0.03	80
SINGAPORE	1993	14897	20	13728	744	405	0	4.55	11550
SLOVAKIA	1993	11173	5594	2130	3110	340	0	2.1	0
SLOVENIA	1993	3577	1533	1563	384	96	0	1.83	14
SOLOMON ISLANDS	1993	43	0	43	0	0	0	0.12	2
SOMALIA	1993	3	0	0	0	3	0	0	0
SOUTH AFRICA	1993	93414	79073	12377	963	1000	0	2.36	2074
SPAIN	1993	61891	19197	35977	3598	3111	8	1.58	4750
SRI LANKA	1993	1337	1	1244	0	92	0	0.07	349
ST. KITTS-NEVIS	1993	23	0	23	0	0	0	0.54	0
ST. PIERRE & MIQUELON	1993	20	0	20	0	0	0	3.18	14
ST. VINCENT & THE GRENADINES	1993	28	0	28	0	0	0	0.26	0
SUDAN	1993	793	0	759	0	34	0	0.03	34
SURINAME	1993	588	0	581	0	7	0	1.39	0
SWAZILAND	1993	36	36	0	0	0	0	0.04	0
SWEDEN	1993	14494	2839	10924	438	294	0	1.66	1143
SWITZERLAND	1993	11187	187	9195	1262	544	0	1.6	929
SYRIAN ARAB REPUBLIC	1993	12849	1	9335	1022	612	1879	0.93	162
TAIWAN	1993	43662	16292	22495	1615	3260	0	2.08	1604
TAJIKISTAN	1993	1410	139	491	739	41	0	0.25	15
THAILAND	1993	38875	8168	22498	4555	3654	0	0.66	0
TIMOR-LESTE (FORMERLY EAST TIMOR)	1993
TOGO	1993	236	0	188	0	48	0	0.06	8
TONGA	1993	28	0	28	0	0	0	0.29	3
TRINIDAD AND TOBAGO	1993	4587	0	1101	2715	72	698	3.68	0
TUNISIA	1993	4500	79	3092	679	581	69	0.52	68
TURKEY	1993	44794	17262	20614	2648	4249	21	0.76	350
TURKMENISTAN	1993	7544	98	2405	4892	150	0	1.89	0
TURKS AND CAICOS ISLANDS	1993
UGANDA	1993	224	0	217	0	7	0	0.01	0
UKRAINE	1993	148926	73642	23007	50237	2040	0	2.89	1026
UNITED ARAB EMIRATES	1993	17993	0	7503	9716	544	231	8.25	257
UNITED KINGDOM	1993	154765	54158	61024	36802	1501	1281	2.67	5670
UNITED REPUBLIC OF TANZANIA	1993	719	72	574	0	73	0	0.03	42
UNITED STATES OF AMERICA	1993	1409186	513894	581113	300589	10216	3375	5.26	36039
URUGUAY	1993	1218	0	1150	0	68	0	0.38	321
USSR	1993
UZBEKISTAN	1993	32324	1625	7721	22257	721	0	1.47	0
VANUATU	1993	18	0	18	0	0	0	0.11	0
VENEZUELA	1993	33912	274	18889	10872	931	2945	1.6	702
VIET NAM	1993	6264	2428	3265	0	571	0	0.09	0
WALLIS AND FUTUNA ISLANDS	1993
WESTERN SAHARA	1993	55	0	55	0	0	0	0.23	3
YEMEN	1993	2572	0	2463	0	109	0	0.18	146
YUGOSLAVIA (FORMER SOCIALIST FEDERAL REPUBLIC)	1993
YUGOSLAVIA (MONTENEGRO & SERBIA)	1993	10769	8640	1051	930	148	0	1.02	34
ZAMBIA	1993	682	241	393	0	48	0	0.08	29
ZIMBABWE	1993	4420	3427	857	0	136	0	0.39	0
Total (in Pg C or Gt C)	1993	6.1214	2.38544	2.41916	1.10529	0.175565	0.035961		0.150893
EU-15 (in Pg C or Gt C)	1993	0.870674
EU-27 w/o CY and MT (in Pg C or Gt C)	1993	1.09929

## Sheet: CDIAC Nations 1994
National CO2 Emissions from Fossil-Fuel Burning, Cement Manufacture, and Gas Flaring: 1994
WS 7
Created:		M. Jonas								16 June 2009
Modified:		M. Jonas								15 February 2012
Source:		Global, Regional, and National Fossil-Fuel CO2 Emissions								doi: 10.3334/CDIAC/00001_V2011
		Carbon Dioxide Information Analysis Center, Oak Ridge National Laboratory, Oak Ridge, Tennessee 37831–6335, USA								http://cdiac.ornl.gov/trends/emis/overview_2008.html
Authors:		T.A. Boden, G. Marland and R.J. Andres
Remarks:		1. Annual sums were tallied before each element was rounded and reported by the authors so totals may differ slightly from the sum of the elements due to rounding.
Nation	Year	Total CO2 emissions from fossil-fuels	Emissions from solid fuel consumption	Emissions from liquid fuel consumption	Emissions from gas fuel consumption	Emissions from cement production	Emissions from gas flaring	Per capita carbon emissions	Emissions from bunker fuels
		103 t C	103 t C	103 t C	103 t C	103 t C	103 t C	t C / cap	103 t C
AFGHANISTAN	1994	360	4	242	92	16	6	0.02	4
ALBANIA	1994	526	46	439	27	14	0	0.17	0
ALGERIA	1994	23548	606	8311	10204	824	3604	0.85	477
ANDORRA	1994
ANGOLA	1994	1061	0	354	265	33	409	0.09	359
ANGUILLA	1994
ANTARCTIC FISHERIES	1994	4	0	4	0	0	0	4.19	56
ANTIGUA & BARBUDA	1994	85	0	85	0	0	0	1.29	36
ARGENTINA	1994	33638	972	18342	11648	854	1823	0.98	334
ARMENIA	1994	809	26	327	441	14	0	0.25	0
ARUBA	1994	481	0	481	0	0	0	6.26	0
AUSTRALIA	1994	82890	48262	23918	9739	884	87	4.63	2079
AUSTRIA	1994	15704	3190	8246	3611	657	0	1.99	173
AZERBAIJAN	1994	11558	1	6943	4550	64	0	1.5	266
BAHAMAS	1994	469	1	468	0	0	0	1.7	188
BAHRAIN	1994	4160	0	785	3344	31	0	7.41	0
BANGLADESH	1994	5173	27	1977	3131	38	0	0.04	0
BARBADOS	1994	204	0	182	12	11	0	0.79	95
BELARUS	1994	17975	1617	8553	7603	202	0	1.75	0
BELGIUM	1994	30899	9193	14520	6041	1144	0	3.07	4312
BELIZE	1994	102	0	102	0	0	0	0.48	11
BENIN	1994	345	0	282	0	63	0	0.06	17
BERMUDA	1994	129	0	129	0	0	0	2.11	13
BHUTAN	1994	58	17	25	0	16	0	0.11	0
BOSNIA & HERZEGOVINA	1994	990	321	470	167	33	0	0.29	0
BOTSWANA	1994	957	662	296	0	0	0	0.63	0
BRAZIL	1994	66036	11485	48074	2411	3431	634	0.41	1539
BRITISH VIRGIN ISLANDS	1994	14	0	14	0	0	0	0.79	0
BRUNEI (DARUSSALAM)	1994	1475	0	564	717	0	194	5.14	0
BULGARIA	1994	15230	8037	4828	2104	260	0	1.8	227
BURKINA FASO	1994	176	0	176	0	0	0	0.02	0
BURUNDI	1994	93	5	89	0	0	0	0.02	4
CAMBODIA	1994	147	0	133	0	14	0	0.01	0
CANADA	1994	123941	26441	60720	34107	1439	1234	4.27	1211
CAPE VERDE	1994	30	0	30	0	0	0	0.08	4
CAYMAN ISLANDS	1994	79	0	79	0	0	0	2.5	10
CENTRAL AFRICAN REPUBLIC	1994	64	0	64	0	0	0	0.02	11
CHAD	1994	28	0	28	0	0	0	0	16
CHILE	1994	10948	2555	6991	898	407	97	0.77	303
CHINA (MAINLAND)	1994	833990	649724	115642	11345	57280	0	0.7	2426
COLOMBIA	1994	18427	3715	10797	2450	1268	197	0.51	127
COMOROS	1994	21	0	21	0	0	0	0.04	0
CONGO	1994	586	0	473	55	12	46	0.22	7
COOK ISLANDS	1994	6	0	6	0	0	0	0.32	7
COSTA RICA	1994	1437	0	1309	0	128	0	0.42	0
COTE D IVOIRE	1994	1432	0	1282	0	150	0	0.1	172
CROATIA	1994	4602	249	2904	1170	279	0	0.99	93
CUBA	1994	8781	51	8573	10	147	0	0.81	145
CYPRUS	1994	1585	20	1422	0	143	0	2.2	256
CZECH REPUBLIC	1994	34821	24646	5838	3616	721	0	3.37	143
CZECHOSLOVAKIA	1994
DEMOCRATIC PEOPLE S REPUBLIC OF KOREA	1994	70805	65344	3149	0	2312	0	3.31	0
DEMOCRATIC REPUBLIC OF THE CONGO (FORMERLY ZAIRE)	1994	676	229	424	0	23	0	0.02	93
DENMARK	1994	16688	8059	6650	1535	330	114	3.2	1815
DJIBOUTI	1994	117	0	117	0	0	0	0.19	243
DOMINICA	1994	19	0	19	0	0	0	0.28	0
DOMINICAN REPUBLIC	1994	3457	75	3208	0	174	0	0.43	0
ECUADOR	1994	3719	0	2902	132	294	391	0.33	211
EGYPT	1994	23265	1008	14566	5502	2190	0	0.37	2389
EL SALVADOR	1994	1208	0	1092	0	116	0	0.21	0
EQUATORIAL GUINEA	1994	10	0	10	0	0	0	0.02	2
ERITREA	1994	50	0	44	0	6	0	0.02	0
ESTONIA	1994	5089	3468	1278	287	55	0	3.47	126
ETHIOPIA	1994	819	0	756	0	63	0	0.01	132
FAEROE ISLANDS	1994	142	0	142	0	0	0	3.25	0
FALKLAND ISLANDS (MALVINAS)	1994	10	4	7	0	0	0	4.41	0
FEDERAL REPUBLIC OF GERMANY	1994
FEDERATED STATES OF MICRONESIA	1994
FIJI	1994	226	14	198	0	13	0	0.3	45
FINLAND	1994	16202	7100	7270	1715	118	0	3.19	587
FORMER DEMOCRATIC YEMEN	1994
FORMER GERMAN DEMOCRATIC REPUBLIC	1994
FORMER YEMEN	1994
FRANCE (INCLUDING MONACO)	1994	100752	15470	64458	17927	2896	0	1.74	4927
FRENCH GUIANA	1994	244	0	239	0	5	0	1.81	14
FRENCH POLYNESIA	1994	155	0	155	0	0	0	0.73	34
GABON	1994	914	0	483	414	17	0	0.87	308
GAMBIA	1994	57	0	57	0	0	0	0.05	0
GEORGIA	1994	1659	92	305	1248	14	0	0.32	2
GERMANY	1994	246420	101165	101737	38217	4914	387	3.03	5764
GHANA	1994	1383	2	1198	0	183	0	0.08	23
GIBRALTAR	1994	109	0	109	0	0	0	3.8	730
GREECE	1994	21370	9093	10529	29	1718	1	2.02	3610
GREENLAND	1994	138	0	138	0	0	0	2.48	0
GRENADA	1994	45	0	45	0	0	0	0.46	2
GUADELOUPE	1994	408	0	377	0	31	0	1.02	65
GUATEMALA	1994	1865	0	1696	5	163	0	0.19	0
GUINEA	1994	335	0	301	0	34	0	0.05	11
GUINEA BISSAU	1994	76	0	76	0	0	0	0.07	5
GUYANA	1994	364	0	364	0	0	0	0.48	11
HAITI	1994	82	0	82	0	0	0	0.01	5
HONDURAS	1994	910	0	826	0	84	0	0.17	0
HONG KONG SPECIAL ADMINSTRATIVE REGION OF CHINA	1994	8571	4677	3632	0	262	0	1.4	3534
HUNGARY	1994	15835	5048	5629	4775	383	0	1.53	157
ICELAND	1994	548	70	467	0	11	0	2.07	82
INDIA	1994	235869	164796	54300	7915	7752	1107	0.25	547
INDONESIA	1994	60380	7273	30969	16460	2979	2699	0.32	507
IRAQ	1994	20465	0	18506	1661	272	26	1.01	0
IRELAND	1994	8915	3116	4207	1370	221	0	2.49	350
ISLAMIC REPUBLIC OF IRAN	1994	80923	953	50947	20757	2176	6090	1.32	715
ISRAEL	1994	12850	4451	7736	10	653	0	2.47	701
ITALY (INCLUDING SAN MARINO)	1994	112398	11811	70823	25315	4449	0	1.96	3914
JAMAICA	1994	2354	38	2255	0	61	0	0.96	26
JAPAN	1994	320199	85645	189585	32508	12461	0	2.56	9818
JORDAN	1994	3718	0	3043	131	544	0	0.9	176
KAZAKHSTAN	1994	54401	36267	12787	5074	272	0	3.37	413
KENYA	1994	1788	80	1511	0	197	0	0.07	117
KIRIBATI	1994	6	0	6	0	0	0	0.08	0
KUWAIT	1994	9391	0	5013	3980	136	262	5.32	746
KUWAITI OIL FIRES	1994
KYRGYZSTAN	1994	1653	886	244	468	54	0	0.36	10
LAO PEOPLE S DEMOCRATIC REPUBLIC	1994	82	1	80	0	1	0	0.02	0
LATVIA	1994	3073	434	2089	517	33	0	1.21	18
LEBANON	1994	3475	81	2925	0	469	0	1.02	116
LIBERIA	1994	87	0	87	0	0	0	0.05	14
LIBYAN ARAB JAMAHIRIYAH	1994	11416	4	7374	2593	517	929	2.41	154
LITHUANIA	1994	4734	369	3184	1081	100	0	1.3	32
LUXEMBOURG	1994	2787	936	1449	305	97	0	6.92	139
MACAU SPECIAL ADMINSTRATIVE REGION OF CHINA	1994	350	0	350	0	0	0	0.86	0
MACEDONIA	1994	2855	2157	632	0	66	0	1.46	0
MADAGASCAR	1994	359	9	346	0	5	0	0.03	12
MALAWI	1994	196	12	167	0	17	0	0.02	14
MALAYSIA	1994	25637	1701	15053	6111	1350	1423	1.28	211
MALDIVES	1994	60	0	60	0	0	0	0.25	0
MALI	1994	126	0	124	0	2	0	0.01	13
MALTA	1994	725	185	540	0	0	0	1.94	68
MARSHALL ISLANDS	1994	18	0	18	0	0	0	0.35	0
MARTINIQUE	1994	558	0	528	0	30	0	1.52	32
MAURITANIA	1994	852	4	796	0	51	0	0.39	19
MAURITIUS	1994	443	25	418	0	0	0	0.4	154
MEXICO	1994	98834	5055	73226	15899	4039	614	1.1	2526
MONGOLIA	1994	2171	1856	303	0	12	0	0.96	0
MONTENEGRO	1994
MONTSERRAT	1994	10	0	10	0	0	0	0.94	1
MOROCCO	1994	8083	1613	5595	12	864	0	0.3	68
MOZAMBIQUE	1994	292	43	240	0	8	0	0.02	21
MYANMAR (FORMERLY BURMA)	1994	1703	11	942	680	64	6	0.04	6
NAMIBIA	1994	8	0	5	0	3	0	0.01	0
NAURU	1994	37	0	37	0	0	0	3.74	4
NEPAL	1994	463	85	336	0	43	0	0.02	0
NETHERLAND ANTILLES	1994	1791	0	1791	0	0	0	9.34	1515
NETHERLANDS	1994	47108	8959	16879	20754	432	84	3.07	11625
NEW CALEDONIA	1994	470	119	338	0	12	0	2.49	21
NEW ZEALAND	1994	7210	1165	3357	2540	122	25	1.99	747
NICARAGUA	1994	697	0	655	0	42	0	0.15	0
NIGER	1994	238	89	145	0	4	0	0.03	8
NIGERIA	1994	12724	99	9466	2803	357	0	0.12	298
NIUE	1994	1	0	1	0	0	0	0.39	0
NORWAY	1994	7976	1021	5002	1558	196	199	1.84	567
OCCUPIED PALESTINIAN TERRITORY	1994
OMAN	1994	4164	0	1465	2297	163	239	1.97	404
PACIFIC ISLANDS (PALAU)	1994
PAKISTAN	1994	23136	2513	11732	7789	1102	0	0.18	125
PALAU	1994	30	0	30	0	0	0	1.82	13
PANAMA	1994	1304	39	1150	31	84	0	0.5	0
PAPUA NEW GUINEA	1994	595	1	549	45	0	0	0.13	45
PARAGUAY	1994	954	0	864	0	90	0	0.2	2
PERU	1994	6335	340	5183	380	432	0	0.27	240
PHILIPPINES	1994	15345	1604	12435	3	1302	0	0.22	468
PLURINATIONAL STATE OF BOLIVIA	1994	2429	0	1209	606	104	509	0.33	0
POLAND	1994	91672	73718	10992	5081	1881	0	2.38	380
PORTUGAL	1994	13299	3455	8759	0	1085	0	1.33	669
QATAR	1994	8242	0	1105	7072	64	0	16	0
REPUBLIC OF CAMEROON	1994	1041	1	975	0	65	0	0.08	15
REPUBLIC OF KOREA	1994	92815	27405	54223	4288	6899	0	2.09	5339
REPUBLIC OF MOLDOVA	1994	3297	1009	912	1371	5	0	0.76	21
REUNION	1994	532	0	488	0	44	0	0.82	11
ROMANIA	1994	31854	10384	10129	10432	908	0	1.4	137
RUSSIAN FEDERATION	1994	478047	142830	132179	195526	5059	2453	3.22	0
RWANDA	1994	169	0	167	0	1	1	0.03	7
SAINT HELENA	1994	2	0	2	0	0	0	0.31	0
SAINT LUCIA	1994	72	0	72	0	0	0	0.5	0
SAMOA	1994	33	0	33	0	0	0	0.2	0
SAO TOME & PRINCIPE	1994	20	0	20	0	0	0	0.16	0
SAUDI ARABIA	1994	84706	0	48350	33985	2040	331	4.74	3918
SENEGAL	1994	1064	0	960	10	93	0	0.13	150
SERBIA	1994
SEYCHELLES	1994	51	0	51	0	0	0	0.68	95
SIERRA LEONE	1994	159	0	145	0	14	0	0.04	83
SINGAPORE	1994	17826	24	16494	887	422	0	5.28	11978
SLOVAKIA	1994	11004	5192	2487	2959	367	0	2.06	22
SLOVENIA	1994	3070	1374	1181	393	122	0	1.57	15
SOLOMON ISLANDS	1994	42	0	42	0	0	0	0.12	2
SOMALIA	1994	3	0	0	0	3	0	0	0
SOUTH AFRICA	1994	97881	81659	14183	963	1075	0	2.42	2269
SPAIN	1994	66719	19774	39555	3969	3420	1	1.7	4300
SRI LANKA	1994	1475	2	1347	0	126	0	0.08	351
ST. KITTS-NEVIS	1994	24	0	24	0	0	0	0.57	0
ST. PIERRE & MIQUELON	1994	19	0	19	0	0	0	3.05	15
ST. VINCENT & THE GRENADINES	1994	33	0	33	0	0	0	0.31	0
SUDAN	1994	1212	0	1190	0	22	0	0.04	34
SURINAME	1994	590	0	582	0	8	0	1.37	0
SWAZILAND	1994	132	132	0	0	0	0	0.14	0
SWEDEN	1994	15390	2873	11824	400	293	0	1.75	1289
SWITZERLAND	1994	11309	190	9281	1244	594	0	1.6	988
SYRIAN ARAB REPUBLIC	1994	13235	1	9477	1108	612	2037	0.93	203
TAIWAN	1994	45695	17194	23247	2164	3090	0	2.16	1763
TAJIKISTAN	1994	642	30	179	406	27	0	0.11	4
THAILAND	1994	43163	9096	24879	5122	4066	0	0.72	0
TIMOR-LESTE (FORMERLY EAST TIMOR)	1994
TOGO	1994	227	0	188	0	39	0	0.05	8
TONGA	1994	29	0	29	0	0	0	0.3	3
TRINIDAD AND TOBAGO	1994	5414	0	1299	3444	79	592	4.31	236
TUNISIA	1994	4347	72	2641	935	626	72	0.49	89
TURKEY	1994	44085	17013	20081	2947	4011	33	0.73	309
TURKMENISTAN	1994	9129	0	2390	6644	95	0	2.23	0
TURKS AND CAICOS ISLANDS	1994
UGANDA	1994	203	0	198	0	5	0	0.01	0
UKRAINE	1994	121901	57922	17757	44671	1550	0	2.38	892
UNITED ARAB EMIRATES	1994	19943	0	7796	11263	680	205	8.67	274
UNITED KINGDOM	1994	153743	50881	60939	38546	1674	1703	2.65	6338
UNITED REPUBLIC OF TANZANIA	1994	667	41	584	0	43	0	0.02	42
UNITED STATES OF AMERICA	1994	1425464	499351	598091	313840	10792	3389	5.25	35396
URUGUAY	1994	1109	0	1013	0	96	0	0.35	219
USSR	1994
UZBEKISTAN	1994	30265	1655	6627	21330	653	0	1.35	0
VANUATU	1994	18	0	18	0	0	0	0.1	0
VENEZUELA	1994	35437	208	17310	13657	942	3319	1.64	652
VIET NAM	1994	7173	2978	3557	0	639	0	0.1	0
WALLIS AND FUTUNA ISLANDS	1994
WESTERN SAHARA	1994	55	0	55	0	0	0	0.22	3
YEMEN	1994	3100	0	2991	0	109	0	0.21	121
YUGOSLAVIA (FORMER SOCIALIST FEDERAL REPUBLIC)	1994
YUGOSLAVIA (MONTENEGRO & SERBIA)	1994	10476	8846	994	417	219	0	0.98	32
ZAMBIA	1994	660	229	393	0	38	0	0.07	29
ZIMBABWE	1994	4812	3699	967	0	146	0	0.42	0
Total (in Pg C or Gt C)	1994	6.14286	2.39787	2.41287	1.10827	0.186267	0.037572		0.156489
EU-15 (in Pg C or Gt C)	1994	0.870553
EU-27 w/o CY and MT (in Pg C or Gt C)	1994	1.08693

## Sheet: CDIAC Nations 1995
National CO2 Emissions from Fossil-Fuel Burning, Cement Manufacture, and Gas Flaring: 1995
WS 8
Created:		M. Jonas								16 June 2009
Modified:		M. Jonas								15 February 2012
Source:		Global, Regional, and National Fossil-Fuel CO2 Emissions								doi: 10.3334/CDIAC/00001_V2011
		Carbon Dioxide Information Analysis Center, Oak Ridge National Laboratory, Oak Ridge, Tennessee 37831–6335, USA								http://cdiac.ornl.gov/trends/emis/overview_2008.html
Authors:		T.A. Boden, G. Marland and R.J. Andres
Remarks:		1. Annual sums were tallied before each element was rounded and reported by the authors so totals may differ slightly from the sum of the elements due to rounding.
Nation	Year	Total CO2 emissions from fossil-fuels	Emissions from solid fuel consumption	Emissions from liquid fuel consumption	Emissions from gas fuel consumption	Emissions from cement production	Emissions from gas flaring	Per capita carbon emissions	Emissions from bunker fuels
		103 t C	103 t C	103 t C	103 t C	103 t C	103 t C	t C / cap	103 t C
AFGHANISTAN	1995	346	4	232	88	16	6	0.02	4
ALBANIA	1995	569	44	484	14	27	0	0.18	0
ALGERIA	1995	25823	363	7391	12888	928	4252	0.91	534
ANDORRA	1995	111	0	111	0	0	0	1.71	0
ANGOLA	1995	3003	0	2307	286	27	383	0.24	324
ANGUILLA	1995
ANTARCTIC FISHERIES	1995	1	0	1	0	0	0	0.84	61
ANTIGUA & BARBUDA	1995	88	0	88	0	0	0	1.29	36
ARGENTINA	1995	33419	1010	17149	14518	741	0	0.96	410
ARMENIA	1995	952	2	204	714	31	0	0.3	29
ARUBA	1995	487	0	487	0	0	0	6.06	0
AUSTRALIA	1995	83838	48724	23676	10457	884	97	4.63	2295
AUSTRIA	1995	16532	3649	8445	3915	523	0	2.08	192
AZERBAIJAN	1995	9159	4	5496	3632	27	0	1.18	355
BAHAMAS	1995	472	1	471	0	0	0	1.68	190
BAHRAIN	1995	4369	0	781	3560	27	0	7.56	0
BANGLADESH	1995	6222	333	2296	3556	38	0	0.05	41
BARBADOS	1995	226	0	202	14	10	0	0.87	102
BELARUS	1995	16940	1443	8152	7177	168	0	1.65	0
BELGIUM	1995	30809	8814	14250	6627	1118	0	3.06	4188
BELIZE	1995	103	0	103	0	0	0	0.47	8
BENIN	1995	362	0	283	0	79	0	0.06	17
BERMUDA	1995	127	0	127	0	0	0	2.07	14
BHUTAN	1995	68	21	28	0	19	0	0.13	0
BOSNIA & HERZEGOVINA	1995	966	376	483	77	31	0	0.29	0
BOTSWANA	1995	961	669	292	0	0	0	0.62	5
BRAZIL	1995	75147	12109	55974	2587	3843	634	0.46	1569
BRITISH VIRGIN ISLANDS	1995	14	0	14	0	0	0	0.77	0
BRUNEI (DARUSSALAM)	1995	1504	0	496	746	0	262	5.1	0
BULGARIA	1995	16309	8113	5338	2576	282	0	1.95	235
BURKINA FASO	1995	171	0	167	0	4	0	0.02	9
BURUNDI	1995	91	5	86	0	0	0	0.01	5
CAMBODIA	1995	392	0	378	0	14	0	0.03	9
CANADA	1995	125386	26859	60697	35171	1420	1239	4.28	1239
CAPE VERDE	1995	31	0	31	0	0	0	0.08	4
CAYMAN ISLANDS	1995	79	0	79	0	0	0	2.39	12
CENTRAL AFRICAN REPUBLIC	1995	64	0	64	0	0	0	0.02	11
CHAD	1995	28	0	28	0	0	0	0	16
CHILE	1995	11893	2814	7669	878	445	86	0.83	351
CHINA (MAINLAND)	1995	905450	701352	127792	11582	64724	0	0.75	895
COLOMBIA	1995	16256	3858	8676	2264	1279	179	0.45	744
COMOROS	1995	22	0	22	0	0	0	0.04	0
CONGO	1995	427	0	313	55	13	45	0.15	9
COOK ISLANDS	1995	6	0	6	0	0	0	0.32	7
COSTA RICA	1995	1327	0	1209	0	118	0	0.38	0
COTE D IVOIRE	1995	1945	0	1783	26	136	0	0.13	174
CROATIA	1995	4803	195	3168	1208	232	0	1.03	77
CUBA	1995	6997	46	6742	9	200	0	0.64	233
CYPRUS	1995	1559	14	1406	0	139	0	2.13	281
CZECH REPUBLIC	1995	35307	24524	6036	4092	656	0	3.42	154
CZECHOSLOVAKIA	1995
DEMOCRATIC PEOPLE S REPUBLIC OF KOREA	1995	70725	64738	3675	0	2312	0	3.26	0
DEMOCRATIC REPUBLIC OF THE CONGO (FORMERLY ZAIRE)	1995	809	232	545	0	32	0	0.02	96
DENMARK	1995	15080	6488	6361	1792	351	88	2.88	1890
DJIBOUTI	1995	117	0	117	0	0	0	0.19	239
DOMINICA	1995	22	0	22	0	0	0	0.32	0
DOMINICAN REPUBLIC	1995	4392	80	4113	0	198	0	0.54	0
ECUADOR	1995	6221	0	5332	127	356	405	0.55	216
EGYPT	1995	26104	669	15933	7099	2402	0	0.41	2352
EL SALVADOR	1995	1440	0	1319	0	121	0	0.25	0
EQUATORIAL GUINEA	1995	36	0	36	0	0	0	0.08	2
ERITREA	1995	81	0	74	0	7	0	0.03	0
ESTONIA	1995	4569	3287	897	327	57	0	3.17	91
ETHIOPIA	1995	587	0	504	0	83	0	0.01	143
FAEROE ISLANDS	1995	173	0	173	0	0	0	4.01	0
FALKLAND ISLANDS (MALVINAS)	1995	11	4	8	0	0	0	4.57	0
FEDERAL REPUBLIC OF GERMANY	1995
FEDERATED STATES OF MICRONESIA	1995
FIJI	1995	242	14	216	0	12	0	0.32	46
FINLAND	1995	14270	6390	5983	1773	123	0	2.79	529
FORMER DEMOCRATIC YEMEN	1995
FORMER GERMAN DEMOCRATIC REPUBLIC	1995
FORMER YEMEN	1995
FRANCE (INCLUDING MONACO)	1995	107251	16810	68374	19390	2678	0	1.85	5424
FRENCH GUIANA	1995	248	0	240	0	8	0	1.79	14
FRENCH POLYNESIA	1995	159	0	159	0	0	0	0.74	36
GABON	1995	1052	0	506	525	21	0	0.97	290
GAMBIA	1995	59	0	59	0	0	0	0.05	0
GEORGIA	1995	628	43	111	461	14	0	0.12	2
GERMANY	1995	245848	96670	101913	42033	4529	704	3.01	5778
GHANA	1995	1480	2	1301	0	177	0	0.09	24
GIBRALTAR	1995	95	0	95	0	0	0	3.32	950
GREECE	1995	21594	8999	10599	27	1969	1	2.02	3824
GREENLAND	1995	138	0	138	0	0	0	2.48	0
GRENADA	1995	47	0	47	0	0	0	0.47	2
GUADELOUPE	1995	414	0	383	0	31	0	1.02	65
GUATEMALA	1995	1954	0	1792	6	157	0	0.2	0
GUINEA	1995	341	0	307	0	34	0	0.05	11
GUINEA BISSAU	1995	77	0	77	0	0	0	0.07	5
GUYANA	1995	404	0	404	0	0	0	0.53	9
HAITI	1995	257	0	257	0	0	0	0.03	6
HONDURAS	1995	1058	0	960	0	98	0	0.19	0
HONG KONG SPECIAL ADMINSTRATIVE REGION OF CHINA	1995	8623	5042	3306	15	260	0	1.39	4293
HUNGARY	1995	16377	4967	5637	5383	391	0	1.59	151
ICELAND	1995	529	57	461	0	11	0	1.98	94
INDIA	1995	250899	171883	59029	10658	8432	898	0.26	551
INDONESIA	1995	61342	6871	31076	17624	3146	2625	0.32	504
IRAQ	1995	21244	0	19270	1661	287	26	1.01	0
IRELAND	1995	8970	3059	4220	1457	235	0	2.49	409
ISLAMIC REPUBLIC OF IRAN	1995	77698	1119	47998	20222	2217	6142	1.25	732
ISRAEL	1995	14790	5182	8753	10	844	0	2.75	756
ITALY (INCLUDING SAN MARINO)	1995	119341	12708	74159	27889	4585	0	2.09	4097
JAMAICA	1995	2646	40	2535	0	71	0	1.07	26
JAPAN	1995	322904	88864	188503	33232	12304	0	2.57	9227
JORDAN	1995	3697	0	3102	118	477	0	0.86	209
KAZAKHSTAN	1995	45468	29466	9345	6301	356	0	2.86	293
KENYA	1995	2060	101	1747	0	213	0	0.07	47
KIRIBATI	1995	6	0	6	0	0	0	0.08	0
KUWAIT	1995	13725	0	8337	4861	265	262	7.96	806
KUWAITI OIL FIRES	1995
KYRGYZSTAN	1995	1220	315	391	472	42	0	0.27	53
LAO PEOPLE S DEMOCRATIC REPUBLIC	1995	86	1	85	0	1	0	0.02	0
LATVIA	1995	2628	301	1668	631	28	0	1.05	21
LEBANON	1995	3714	137	3096	0	481	0	1.06	140
LIBERIA	1995	91	0	90	0	1	0	0.05	14
LIBYAN ARAB JAMAHIRIYAH	1995	12501	4	8564	2561	437	935	2.59	323
LITHUANIA	1995	4419	294	2770	1267	88	0	1.22	33
LUXEMBOURG	1995	2277	531	1301	348	97	0	5.57	157
MACAU SPECIAL ADMINSTRATIVE REGION OF CHINA	1995	339	0	339	0	0	0	0.82	0
MACEDONIA	1995	2956	2222	663	0	71	0	1.51	17
MADAGASCAR	1995	358	7	346	0	5	0	0.03	15
MALAWI	1995	199	12	167	0	19	0	0.02	14
MALAYSIA	1995	33033	1728	16902	11465	1457	1480	1.6	217
MALDIVES	1995	75	0	75	0	0	0	0.3	0
MALI	1995	128	0	126	0	2	0	0.01	14
MALTA	1995	735	185	550	0	0	0	1.95	81
MARSHALL ISLANDS	1995	18	0	18	0	0	0	0.36	0
MARTINIQUE	1995	559	0	529	0	30	0	1.51	32
MAURITANIA	1995	814	3	795	0	16	0	0.36	17
MAURITIUS	1995	499	46	454	0	0	0	0.44	126
MEXICO	1995	94131	5697	67919	16226	3270	1018	1.03	2366
MONGOLIA	1995	2161	1867	279	0	15	0	0.95	0
MONTENEGRO	1995
MONTSERRAT	1995	12	0	12	0	0	0	1.15	1
MOROCCO	1995	8283	1904	5501	7	871	0	0.31	68
MOZAMBIQUE	1995	303	41	255	0	8	0	0.02	19
MYANMAR (FORMERLY BURMA)	1995	1898	18	1045	761	70	4	0.04	7
NAMIBIA	1995	475	12	460	0	3	0	0.29	0
NAURU	1995	38	0	38	0	0	0	3.78	4
NEPAL	1995	555	93	418	0	44	0	0.03	0
NETHERLAND ANTILLES	1995	1772	0	1772	0	0	0	9.29	1521
NETHERLANDS	1995	48080	9680	16680	21195	432	94	3.11	12010
NEW CALEDONIA	1995	472	119	338	0	14	0	2.44	21
NEW ZEALAND	1995	7337	1213	3570	2409	129	17	1.99	731
NICARAGUA	1995	774	0	730	0	44	0	0.17	0
NIGER	1995	251	97	150	0	4	0	0.03	6
NIGERIA	1995	9522	106	6315	2747	354	0	0.09	298
NIUE	1995	1	0	1	0	0	0	0.4	0
NORWAY	1995	8999	1094	5913	1549	219	224	2.06	683
OCCUPIED PALESTINIAN TERRITORY	1995
OMAN	1995	4345	0	2119	1877	160	189	2	475
PACIFIC ISLANDS (PALAU)	1995
PAKISTAN	1995	23039	2274	11925	7672	1168	0	0.18	127
PALAU	1995	31	0	31	0	0	0	1.82	13
PANAMA	1995	947	26	805	32	84	0	0.35	0
PAPUA NEW GUINEA	1995	556	1	509	47	0	0	0.12	46
PARAGUAY	1995	1081	0	995	0	86	0	0.23	15
PERU	1995	6513	380	5358	258	516	0	0.27	298
PHILIPPINES	1995	17209	2005	13765	4	1435	0	0.25	456
PLURINATIONAL STATE OF BOLIVIA	1995	2570	0	1231	694	121	525	0.34	0
POLAND	1995	94577	75356	11767	5562	1892	0	2.45	481
PORTUGAL	1995	14288	3692	9491	0	1105	0	1.42	839
QATAR	1995	8406	0	1268	7072	65	0	15.99	0
REPUBLIC OF CAMEROON	1995	1190	1	1114	0	75	0	0.08	16
REPUBLIC OF KOREA	1995	101113	28643	59774	5199	7498	0	2.26	6145
REPUBLIC OF MOLDOVA	1995	3052	613	833	1599	7	0	0.7	13
REUNION	1995	585	0	542	0	43	0	0.88	13
ROMANIA	1995	35049	10718	11382	12017	931	0	1.55	153
RUSSIAN FEDERATION	1995	461512	137564	121652	194628	4964	2704	3.11	7857
RWANDA	1995	167	0	166	0	1	1	0.03	8
SAINT HELENA	1995	3	0	3	0	0	0	0.64	0
SAINT LUCIA	1995	85	0	85	0	0	0	0.58	0
SAMOA	1995	36	0	36	0	0	0	0.21	0
SAO TOME & PRINCIPE	1995	21	0	21	0	0	0	0.16	0
SAUDI ARABIA	1995	64046	0	41060	20714	2145	126	3.51	3718
SENEGAL	1995	953	0	834	25	94	0	0.11	190
SERBIA	1995
SEYCHELLES	1995	52	0	52	0	0	0	0.69	94
SIERRA LEONE	1995	160	0	146	0	14	0	0.04	86
SINGAPORE	1995	12847	11	11478	923	435	0	3.69	14402
SLOVAKIA	1995	11865	5698	2600	3172	395	0	2.22	33
SLOVENIA	1995	3958	1480	1877	466	135	0	2.01	16
SOLOMON ISLANDS	1995	44	0	44	0	0	0	0.12	2
SOMALIA	1995	3	0	0	0	3	0	0	0
SOUTH AFRICA	1995	96389	85325	8758	1071	1234	0	2.33	3254
SPAIN	1995	70147	20028	41642	4880	3594	3	1.78	4466
SRI LANKA	1995	1581	1	1458	0	122	0	0.09	355
ST. KITTS-NEVIS	1995	26	0	26	0	0	0	0.6	0
ST. PIERRE & MIQUELON	1995	19	0	19	0	0	0	3.05	3
ST. VINCENT & THE GRENADINES	1995	36	0	36	0	0	0	0.33	0
SUDAN	1995	1255	0	1202	0	53	0	0.04	35
SURINAME	1995	595	0	587	0	8	0	1.36	0
SWAZILAND	1995	124	124	0	0	0	0	0.13	0
SWEDEN	1995	14606	3029	10807	425	345	0	1.65	1292
SWITZERLAND	1995	10741	200	8623	1371	547	0	1.51	1032
SYRIAN ARAB REPUBLIC	1995	14060	4	9484	1397	607	2569	0.96	133
TAIWAN	1995	48624	17686	25611	2270	3057	0	2.28	2013
TAJIKISTAN	1995	668	14	183	457	14	0	0.12	4
THAILAND	1995	49485	10354	29066	5319	4746	0	0.82	0
TIMOR-LESTE (FORMERLY EAST TIMOR)	1995
TOGO	1995	260	0	212	0	48	0	0.06	9
TONGA	1995	30	0	30	0	0	0	0.31	3
TRINIDAD AND TOBAGO	1995	5718	0	1574	3535	76	532	4.52	193
TUNISIA	1995	4291	65	2459	1024	672	71	0.48	87
TURKEY	1995	48188	17658	22368	3614	4509	39	0.79	378
TURKMENISTAN	1995	9441	0	2382	7000	59	0	2.25	0
TURKS AND CAICOS ISLANDS	1995	3	0	3	0	0	0	0.22	0
UGANDA	1995	261	0	249	0	12	0	0.01	0
UKRAINE	1995	121610	58726	19076	42773	1034	0	2.38	761
UNITED ARAB EMIRATES	1995	19264	0	6022	12247	805	189	7.92	410
UNITED KINGDOM	1995	153947	50451	59242	41406	1605	1243	2.64	5960
UNITED REPUBLIC OF TANZANIA	1995	969	31	857	0	81	0	0.03	43
UNITED STATES OF AMERICA	1995	1428407	505354	584951	323228	10652	4222	5.2	37634
URUGUAY	1995	1252	0	1170	0	82	0	0.39	376
USSR	1995
UZBEKISTAN	1995	27519	893	5713	20451	462	0	1.2	0
VANUATU	1995	18	0	18	0	0	0	0.11	0
VENEZUELA	1995	36334	5	16335	15602	1043	3349	1.64	836
VIET NAM	1995	7976	3425	3654	104	793	0	0.11	0
WALLIS AND FUTUNA ISLANDS	1995
WESTERN SAHARA	1995	57	0	57	0	0	0	0.22	3
YEMEN	1995	3068	0	2920	0	148	0	0.2	129
YUGOSLAVIA (FORMER SOCIALIST FEDERAL REPUBLIC)	1995
YUGOSLAVIA (MONTENEGRO & SERBIA)	1995	11066	9229	1047	559	231	0	1.02	36
ZAMBIA	1995	592	90	460	0	42	0	0.06	24
ZIMBABWE	1995	4126	2896	1098	0	132	0	0.35	91
Total (in Pg C or Gt C)	1995	6.25423	2.46091	2.41491	1.14404	0.1965	0.037868		0.173143
EU-15 (in Pg C or Gt C)	1995	0.885189
EU-27 w/o CY and MT (in Pg C or Gt C)	1995	1.11025

## Sheet: CDIAC Nations 1996
National CO2 Emissions from Fossil-Fuel Burning, Cement Manufacture, and Gas Flaring: 1996
WS 9
Created:		M. Jonas								16 June 2009
Modified:		M. Jonas								15 February 2012
Source:		Global, Regional, and National Fossil-Fuel CO2 Emissions								doi: 10.3334/CDIAC/00001_V2011
		Carbon Dioxide Information Analysis Center, Oak Ridge National Laboratory, Oak Ridge, Tennessee 37831–6335, USA								http://cdiac.ornl.gov/trends/emis/overview_2008.html
Authors:		T.A. Boden, G. Marland and R.J. Andres
Remarks:		1. Annual sums were tallied before each element was rounded and reported by the authors so totals may differ slightly from the sum of the elements due to rounding.
Nation	Year	Total CO2 emissions from fossil-fuels	Emissions from solid fuel consumption	Emissions from liquid fuel consumption	Emissions from gas fuel consumption	Emissions from cement production	Emissions from gas flaring	Per capita carbon emissions	Emissions from bunker fuels
		103 t C	103 t C	103 t C	103 t C	103 t C	103 t C	t C / cap	103 t C
AFGHANISTAN	1996	327	2	219	84	16	6	0.02	4
ALBANIA	1996	550	31	479	12	28	0	0.18	0
ALGERIA	1996	26334	239	7480	13801	884	3930	0.92	508
ANDORRA	1996	116	0	116	0	0	0	1.78	0
ANGOLA	1996	2861	0	1930	286	37	608	0.22	283
ANGUILLA	1996
ANTARCTIC FISHERIES	1996	1	0	1	0	0	0	0.84	61
ANTIGUA & BARBUDA	1996	88	0	88	0	0	0	1.26	36
ARGENTINA	1996	35238	846	17992	15705	696	0	1	495
ARMENIA	1996	711	4	113	557	38	0	0.22	16
ARUBA	1996	494	0	494	0	0	0	5.95	0
AUSTRALIA	1996	89790	52644	25632	10498	850	167	4.9	2430
AUSTRIA	1996	16650	3571	8356	4197	527	0	2.09	212
AZERBAIJAN	1996	8608	4	5370	3203	30	0	1.09	191
BAHAMAS	1996	472	1	471	0	0	0	1.65	192
BAHRAIN	1996	4260	0	563	3672	26	0	7.18	287
BANGLADESH	1996	6553	185	2596	3684	88	0	0.05	43
BARBADOS	1996	232	0	202	15	15	0	0.9	113
BELARUS	1996	16405	1374	7266	7564	200	0	1.6	0
BELGIUM	1996	32622	8466	15707	7380	1069	0	3.23	4822
BELIZE	1996	84	0	84	0	0	0	0.37	9
BENIN	1996	345	0	296	0	49	0	0.06	19
BERMUDA	1996	130	0	130	0	0	0	2.1	14
BHUTAN	1996	83	25	35	0	22	0	0.16	0
BOSNIA & HERZEGOVINA	1996	1464	817	498	129	20	0	0.44	0
BOTSWANA	1996	856	537	319	0	0	0	0.54	5
BRAZIL	1996	82150	12788	60862	2899	4705	896	0.5	1801
BRITISH VIRGIN ISLANDS	1996	16	0	16	0	0	0	0.84	0
BRUNEI (DARUSSALAM)	1996	1526	0	523	771	34	198	5.04	0
BULGARIA	1996	15460	7653	4596	2921	291	0	1.87	204
BURKINA FASO	1996	193	0	189	0	4	0	0.02	11
BURUNDI	1996	90	5	85	0	0	0	0.01	5
CAMBODIA	1996	444	0	417	0	27	0	0.04	10
CANADA	1996	127593	27617	59795	37365	1576	1240	4.31	1371
CAPE VERDE	1996	38	0	38	0	0	0	0.09	4
CAYMAN ISLANDS	1996	78	0	78	0	0	0	2.27	14
CENTRAL AFRICAN REPUBLIC	1996	64	0	64	0	0	0	0.02	12
CHAD	1996	29	0	29	0	0	0	0	16
CHILE	1996	13506	3934	8291	707	494	80	0.92	377
CHINA (MAINLAND)	1996	944393	726092	139362	12137	66802	0	0.77	831
COLOMBIA	1996	16505	3415	8890	2793	1211	196	0.44	737
COMOROS	1996	18	0	18	0	0	0	0.04	0
CONGO	1996	468	0	360	55	7	46	0.17	9
COOK ISLANDS	1996	6	0	6	0	0	0	0.32	7
COSTA RICA	1996	1295	0	1182	0	113	0	0.36	0
COTE D IVOIRE	1996	2285	0	1916	234	136	0	0.15	180
CROATIA	1996	5050	160	3285	1354	251	0	1.08	78
CUBA	1996	7352	9	7135	10	198	0	0.67	318
CYPRUS	1996	1619	12	1470	0	136	0	2.18	291
CZECH REPUBLIC	1996	36149	24353	6404	4710	682	0	3.51	110
CZECHOSLOVAKIA	1996
DEMOCRATIC PEOPLE S REPUBLIC OF KOREA	1996	69998	64067	3619	0	2312	0	3.18	0
DEMOCRATIC REPUBLIC OF THE CONGO (FORMERLY ZAIRE)	1996	886	233	620	0	33	0	0.02	96
DENMARK	1996	18736	9429	6610	2237	358	101	3.57	1845
DJIBOUTI	1996	119	0	119	0	0	0	0.19	214
DOMINICA	1996	20	0	20	0	0	0	0.29	0
DOMINICAN REPUBLIC	1996	4785	93	4469	0	223	0	0.58	0
ECUADOR	1996	6515	0	5612	135	412	356	0.56	191
EGYPT	1996	27824	936	16783	7562	2543	0	0.43	2630
EL SALVADOR	1996	1335	0	1206	0	129	0	0.23	0
EQUATORIAL GUINEA	1996	32	0	32	0	0	0	0.07	3
ERITREA	1996	95	0	89	0	6	0	0.03	0
ESTONIA	1996	5129	3709	966	401	53	0	3.62	91
ETHIOPIA	1996	1017	0	923	0	94	0	0.02	128
FAEROE ISLANDS	1996	178	0	178	0	0	0	4.14	0
FALKLAND ISLANDS (MALVINAS)	1996	12	4	8	0	0	0	4.71	0
FEDERAL REPUBLIC OF GERMANY	1996
FEDERATED STATES OF MICRONESIA	1996
FIJI	1996	251	16	224	0	11	0	0.32	46
FINLAND	1996	16740	7695	7058	1853	133	0	3.27	585
FORMER DEMOCRATIC YEMEN	1996
FORMER GERMAN DEMOCRATIC REPUBLIC	1996
FORMER YEMEN	1996
FRANCE (INCLUDING MONACO)	1996	111297	17278	69467	21898	2654	0	1.91	5810
FRENCH GUIANA	1996	247	0	240	0	7	0	1.72	14
FRENCH POLYNESIA	1996	152	0	152	0	0	0	0.69	36
GABON	1996	964	0	478	461	25	0	0.86	309
GAMBIA	1996	59	0	59	0	0	0	0.05	0
GEORGIA	1996	1109	44	657	396	12	0	0.22	44
GERMANY	1996	251981	96066	103927	47007	4288	693	3.08	5841
GHANA	1996	1570	2	1364	0	204	0	0.09	24
GIBRALTAR	1996	53	0	53	0	0	0	1.83	1427
GREECE	1996	21924	8526	11368	30	1999	1	2.04	3423
GREENLAND	1996	141	0	141	0	0	0	2.54	0
GRENADA	1996	48	0	48	0	0	0	0.47	2
GUADELOUPE	1996	416	0	385	0	31	0	1.02	65
GUATEMALA	1996	1814	0	1660	6	148	0	0.18	0
GUINEA	1996	347	0	312	0	35	0	0.05	11
GUINEA BISSAU	1996	78	0	78	0	0	0	0.07	5
GUYANA	1996	417	0	417	0	0	0	0.55	12
HAITI	1996	298	0	298	0	0	0	0.04	0
HONDURAS	1996	1080	0	951	0	129	0	0.19	0
HONG KONG SPECIAL ADMINSTRATIVE REGION OF CHINA	1996	8008	3747	3126	858	276	0	1.27	4405
HUNGARY	1996	17099	5094	5244	6387	374	0	1.66	161
ICELAND	1996	603	66	525	0	12	0	2.23	103
INDIA	1996	273309	184883	66365	10848	10200	1014	0.28	556
INDONESIA	1996	69073	7522	34015	21559	3352	2625	0.35	807
IRAQ	1996	18953	0	17011	1698	218	26	0.87	352
IRELAND	1996	9547	2988	4640	1656	263	0	2.62	422
ISLAMIC REPUBLIC OF IRAN	1996	78169	1313	46896	21165	2496	6300	1.24	1076
ISRAEL	1996	14835	5750	8316	7	762	0	2.68	693
ITALY (INCLUDING SAN MARINO)	1996	116797	11672	71821	28772	4532	0	2.04	4149
JAMAICA	1996	2781	46	2658	0	76	0	1.12	0
JAPAN	1996	328820	91570	189286	35113	12851	0	2.61	8352
JORDAN	1996	3869	0	3277	114	478	0	0.87	252
KAZAKHSTAN	1996	38367	26280	7037	4898	152	0	2.44	284
KENYA	1996	2544	96	2201	0	247	0	0.09	32
KIRIBATI	1996	10	0	10	0	0	0	0.13	0
KUWAIT	1996	13001	0	7594	4873	272	262	7.42	797
KUWAITI OIL FIRES	1996
KYRGYZSTAN	1996	1524	477	421	552	74	0	0.33	58
LAO PEOPLE S DEMOCRATIC REPUBLIC	1996	146	44	90	0	11	0	0.03	0
LATVIA	1996	2604	297	1716	546	44	0	1.06	27
LEBANON	1996	3763	163	3125	0	476	0	1.05	145
LIBERIA	1996	94	0	92	0	2	0	0.05	14
LIBYAN ARAB JAMAHIRIYAH	1996	11410	4	7222	2751	483	950	2.31	346
LITHUANIA	1996	4290	269	2572	1354	95	0	1.19	27
LUXEMBOURG	1996	2301	502	1326	382	91	0	5.55	171
MACAU SPECIAL ADMINSTRATIVE REGION OF CHINA	1996	386	0	386	0	0	0	0.92	0
MACEDONIA	1996	3202	2161	975	0	67	0	1.62	15
MADAGASCAR	1996	385	7	372	0	6	0	0.03	15
MALAWI	1996	194	12	170	0	12	0	0.02	15
MALAYSIA	1996	34190	2112	18971	9894	1679	1534	1.62	143
MALDIVES	1996	87	0	87	0	0	0	0.34	0
MALI	1996	133	0	131	0	2	0	0.01	15
MALTA	1996	809	192	617	0	0	0	2.13	82
MARSHALL ISLANDS	1996	18	0	18	0	0	0	0.36	0
MARTINIQUE	1996	555	0	525	0	30	0	1.49	33
MAURITANIA	1996	818	2	802	0	14	0	0.35	15
MAURITIUS	1996	532	30	502	0	0	0	0.47	148
MEXICO	1996	96776	6643	67368	17217	3450	2097	1.04	2255
MONGOLIA	1996	2193	1865	314	0	14	0	0.96	0
MONTENEGRO	1996
MONTSERRAT	1996	11	0	11	0	0	0	1.16	1
MOROCCO	1996	8507	2377	5224	9	896	0	0.31	64
MOZAMBIQUE	1996	284	0	260	0	24	0	0.02	19
MYANMAR (FORMERLY BURMA)	1996	1979	13	1067	826	69	4	0.04	15
NAMIBIA	1996	520	10	503	0	7	0	0.31	0
NAURU	1996	38	0	38	0	0	0	3.76	4
NEPAL	1996	678	203	434	0	42	0	0.03	0
NETHERLAND ANTILLES	1996	1674	0	1674	0	0	0	8.86	1526
NETHERLANDS	1996	50820	9495	17509	23281	427	109	3.27	12340
NEW CALEDONIA	1996	481	122	346	0	14	0	2.44	21
NEW ZEALAND	1996	8100	1270	3919	2745	132	33	2.17	732
NICARAGUA	1996	798	0	749	0	49	0	0.17	0
NIGER	1996	277	103	170	0	4	0	0.03	9
NIGERIA	1996	11023	106	7787	2784	346	0	0.1	652
NIUE	1996	1	0	1	0	0	0	0.4	0
NORWAY	1996	9048	1063	6203	1310	226	245	2.06	709
OCCUPIED PALESTINIAN TERRITORY	1996
OMAN	1996	4152	0	2040	1742	171	198	1.87	153
PACIFIC ISLANDS (PALAU)	1996
PAKISTAN	1996	25756	2554	13695	8298	1210	0	0.19	117
PALAU	1996	32	0	32	0	0	0	1.81	13
PANAMA	1996	1331	72	1139	32	88	0	0.49	0
PAPUA NEW GUINEA	1996	590	1	523	66	0	0	0.12	48
PARAGUAY	1996	1023	0	940	0	83	0	0.21	29
PERU	1996	6644	359	5483	279	523	0	0.27	315
PHILIPPINES	1996	17901	2889	13316	5	1690	0	0.25	575
PLURINATIONAL STATE OF BOLIVIA	1996	2382	0	1079	878	127	298	0.31	0
POLAND	1996	97852	76955	13100	5899	1898	0	2.53	512
PORTUGAL	1996	13877	3539	9188	0	1150	0	1.38	822
QATAR	1996	8679	0	1407	7177	94	0	16.15	0
REPUBLIC OF CAMEROON	1996	1255	1	1213	0	41	0	0.09	6
REPUBLIC OF KOREA	1996	109362	30246	64352	6817	7947	0	2.43	7532
REPUBLIC OF MOLDOVA	1996	3142	541	767	1829	5	0	0.73	17
REUNION	1996	610	0	569	0	41	0	0.9	9
ROMANIA	1996	34861	10533	11253	12128	946	0	1.55	9
RUSSIAN FEDERATION	1996	455129	139174	110803	198815	3781	2556	3.07	7436
RWANDA	1996	172	0	166	0	6	1	0.03	8
SAINT HELENA	1996	4	0	4	0	0	0	0.8	0
SAINT LUCIA	1996	90	0	90	0	0	0	0.6	0
SAMOA	1996	36	0	36	0	0	0	0.21	0
SAO TOME & PRINCIPE	1996	21	0	21	0	0	0	0.16	0
SAUDI ARABIA	1996	70498	0	46154	21621	2235	488	3.77	3647
SENEGAL	1996	1020	0	887	23	110	0	0.11	192
SERBIA	1996
SEYCHELLES	1996	54	0	54	0	0	0	0.7	94
SIERRA LEONE	1996	170	0	148	0	22	0	0.04	86
SINGAPORE	1996	15082	0	13810	823	449	0	4.2	15302
SLOVAKIA	1996	11670	5554	2300	3434	381	0	2.18	32
SLOVENIA	1996	4141	1366	2180	455	140	0	2.1	15
SOLOMON ISLANDS	1996	44	0	44	0	0	0	0.12	2
SOMALIA	1996
SOUTH AFRICA	1996	97802	86606	9008	964	1224	0	2.32	3276
SPAIN	1996	69356	19537	40906	5488	3421	3	1.76	5835
SRI LANKA	1996	1896	1	1768	0	126	0	0.1	410
ST. KITTS-NEVIS	1996	28	0	28	0	0	0	0.63	0
ST. PIERRE & MIQUELON	1996	19	0	19	0	0	0	3.05	3
ST. VINCENT & THE GRENADINES	1996	37	0	37	0	0	0	0.34	0
SUDAN	1996	1164	0	1112	0	52	0	0.04	90
SURINAME	1996	581	0	573	0	8	0	1.31	0
SWAZILAND	1996	93	93	0	0	0	0	0.09	0
SWEDEN	1996	16512	3169	12555	455	333	0	1.87	1329
SWITZERLAND	1996	10915	151	8785	1484	495	0	1.53	1078
SYRIAN ARAB REPUBLIC	1996	13914	3	9242	1488	612	2569	0.93	77
TAIWAN	1996	50964	20083	25647	2305	2929	0	2.37	1961
TAJIKISTAN	1996	771	6	172	586	7	0	0.13	4
THAILAND	1996	55280	12569	31407	6033	5270	0	0.91	0
TIMOR-LESTE (FORMERLY EAST TIMOR)	1996
TOGO	1996	289	0	233	0	56	0	0.06	10
TONGA	1996	30	0	30	0	0	0	0.31	3
TRINIDAD AND TOBAGO	1996	5940	0	1109	3995	84	752	4.67	178
TUNISIA	1996	4570	65	2725	1089	621	69	0.5	9
TURKEY	1996	52495	20025	23286	4364	4789	32	0.84	379
TURKMENISTAN	1996	8553	72	2760	5660	61	0	2.01	0
TURKS AND CAICOS ISLANDS	1996	3	0	3	0	0	0	0.21	0
UGANDA	1996	287	0	253	0	34	0	0.01	0
UKRAINE	1996	112445	50823	14413	46527	682	0	2.22	639
UNITED ARAB EMIRATES	1996	11197	0	-4627	14803	816	205	4.35	9885
UNITED KINGDOM	1996	158353	46480	60054	48790	1661	1368	2.71	6215
UNITED REPUBLIC OF TANZANIA	1996	944	41	804	0	99	0	0.03	45
UNITED STATES OF AMERICA	1996	1457189	528829	589842	323483	10991	4044	5.24	36585
URUGUAY	1996	1484	1	1391	0	93	0	0.46	307
USSR	1996
UZBEKISTAN	1996	28140	1001	5492	21198	449	0	1.21	0
VANUATU	1996	23	0	23	0	0	0	0.13	0
VENEZUELA	1996	33475	16	12727	17500	1028	2204	1.48	817
VIET NAM	1996	9375	4025	4281	173	896	0	0.13	0
WALLIS AND FUTUNA ISLANDS	1996
WESTERN SAHARA	1996	58	0	58	0	0	0	0.22	3
YEMEN	1996	4073	0	3933	0	140	0	0.25	138
YUGOSLAVIA (FORMER SOCIALIST FEDERAL REPUBLIC)	1996
YUGOSLAVIA (MONTENEGRO & SERBIA)	1996	12946	9146	2098	1403	300	0	1.19	47
ZAMBIA	1996	510	115	348	0	47	0	0.05	21
ZIMBABWE	1996	4089	2865	1088	0	136	0	0.34	97
Total (in Pg C or Gt C)	1996	6.41908	2.53296	2.44613	1.19844	0.203046	0.038504		0.187447
EU-15 (in Pg C or Gt C)	1996	0.909554
EU-27 w/o CY and MT (in Pg C or Gt C)	1996	1.13881

## Sheet: CDIAC Nations 1997
National CO2 Emissions from Fossil-Fuel Burning, Cement Manufacture, and Gas Flaring: 1997
WS 10
Created:		M. Jonas								16 June 2009
Modified:		M. Jonas								15 February 2012
Source:		Global, Regional, and National Fossil-Fuel CO2 Emissions								doi: 10.3334/CDIAC/00001_V2011
		Carbon Dioxide Information Analysis Center, Oak Ridge National Laboratory, Oak Ridge, Tennessee 37831–6335, USA								http://cdiac.ornl.gov/trends/emis/overview_2008.html
Authors:		T.A. Boden, G. Marland and R.J. Andres
Remarks:		1. Annual sums were tallied before each element was rounded and reported by the authors so totals may differ slightly from the sum of the elements due to rounding.
Nation	Year	Total CO2 emissions from fossil-fuels	Emissions from solid fuel consumption	Emissions from liquid fuel consumption	Emissions from gas fuel consumption	Emissions from cement production	Emissions from gas flaring	Per capita carbon emissions	Emissions from bunker fuels
		103 t C	103 t C	103 t C	103 t C	103 t C	103 t C	t C / cap	103 t C
AFGHANISTAN	1997	304	1	203	77	16	6	0.02	4
ALBANIA	1997	421	12	385	10	14	0	0.14	0
ALGERIA	1997	24051	392	8411	10646	965	3637	0.82	227
ANDORRA	1997	125	0	125	0	0	0	1.9	0
ANGOLA	1997	2013	0	909	291	41	772	0.15	285
ANGUILLA	1997	5	0	5	0	0	0	0.49	0
ANTARCTIC FISHERIES	1997	1	0	1	0	0	0	0.84	61
ANTIGUA & BARBUDA	1997	92	0	92	0	0	0	1.28	37
ARGENTINA	1997	36727	758	18250	16786	933	0	1.03	548
ARMENIA	1997	894	4	119	731	40	0	0.29	17
ARUBA	1997	505	0	505	0	0	0	5.92	0
AUSTRALIA	1997	90980	55107	24282	10575	877	139	4.91	2433
AUSTRIA	1997	16733	3801	8324	4084	524	0	2.1	424
AZERBAIJAN	1997	8172	4	5106	3019	43	0	1.03	154
BAHAMAS	1997	475	1	474	0	0	0	1.63	188
BAHRAIN	1997	4723	0	744	3955	23	0	7.78	205
BANGLADESH	1997	6835	335	2743	3620	138	0	0.05	38
BARBADOS	1997	246	0	209	12	24	0	0.96	148
BELARUS	1997	16231	1129	6242	8606	255	0	1.59	0
BELGIUM	1997	31714	8183	15400	7036	1095	0	3.13	5556
BELIZE	1997	106	0	106	0	0	0	0.46	12
BENIN	1997	332	0	305	0	27	0	0.05	15
BERMUDA	1997	130	0	130	0	0	0	2.09	14
BHUTAN	1997	108	51	34	0	22	0	0.21	0
BOSNIA & HERZEGOVINA	1997	3409	2791	513	77	27	0	1.01	0
BOTSWANA	1997	876	576	300	0	0	0	0.54	4
BRAZIL	1997	87592	13002	65262	3218	5181	929	0.53	2181
BRITISH VIRGIN ISLANDS	1997	16	0	16	0	0	0	0.82	0
BRUNEI (DARUSSALAM)	1997	1585	0	554	800	34	197	5.11	0
BULGARIA	1997	14639	8341	3762	2311	225	0	1.79	28
BURKINA FASO	1997	220	0	215	0	5	0	0.02	13
BURUNDI	1997	86	5	81	0	0	0	0.01	5
CAMBODIA	1997	520	0	500	0	20	0	0.04	11
CANADA	1997	131779	29642	61763	37637	1634	1103	4.41	1272
CAPE VERDE	1997	39	0	39	0	0	0	0.09	4
CAYMAN ISLANDS	1997	78	0	78	0	0	0	2.19	14
CENTRAL AFRICAN REPUBLIC	1997	67	0	67	0	0	0	0.02	12
CHAD	1997	31	0	31	0	0	0	0	16
CHILE	1997	15559	5078	8714	1177	508	82	1.05	475
CHINA (MAINLAND)	1997	946144	712215	152282	12052	69595	0	0.77	794
COLOMBIA	1997	17700	3354	9496	3399	1149	302	0.47	781
COMOROS	1997	18	0	18	0	0	0	0.04	0
CONGO	1997	639	0	522	69	3	46	0.22	9
COOK ISLANDS	1997	6	0	6	0	0	0	0.32	7
COSTA RICA	1997	1360	0	1232	0	128	0	0.37	0
COTE D IVOIRE	1997	2229	0	1695	383	150	0	0.14	196
CROATIA	1997	5262	308	3261	1403	290	0	1.14	69
CUBA	1997	6710	8	6450	19	232	0	0.61	356
CYPRUS	1997	1666	14	1528	0	124	0	2.21	294
CZECH REPUBLIC	1997	35476	24638	5385	4790	663	0	3.45	103
CZECHOSLOVAKIA	1997
DEMOCRATIC PEOPLE S REPUBLIC OF KOREA	1997	64000	59710	3338	0	952	0	2.88	0
DEMOCRATIC REPUBLIC OF THE CONGO (FORMERLY ZAIRE)	1997	798	235	546	0	17	0	0.02	97
DENMARK	1997	15562	6674	5929	2456	365	138	2.95	1745
DJIBOUTI	1997	120	0	120	0	0	0	0.18	191
DOMINICA	1997	22	0	22	0	0	0	0.32	0
DOMINICAN REPUBLIC	1997	4974	101	4623	0	250	0	0.59	53
ECUADOR	1997	4984	0	4139	123	394	327	0.42	130
EGYPT	1997	29507	778	19209	6840	2679	0	0.44	2901
EL SALVADOR	1997	1571	0	1432	0	139	0	0.27	0
EQUATORIAL GUINEA	1997	80	0	80	0	0	0	0.16	3
ERITREA	1997	144	0	136	0	8	0	0.04	1
ESTONIA	1997	5076	3635	993	390	58	0	3.62	105
ETHIOPIA	1997	1166	0	1064	0	102	0	0.02	126
FAEROE ISLANDS	1997	179	0	179	0	0	0	4.12	0
FALKLAND ISLANDS (MALVINAS)	1997	13	4	9	0	0	0	4.85	0
FEDERAL REPUBLIC OF GERMANY	1997
FEDERATED STATES OF MICRONESIA	1997
FIJI	1997	207	16	178	0	13	0	0.26	92
FINLAND	1997	16385	7172	7275	1815	123	0	3.19	623
FORMER DEMOCRATIC YEMEN	1997
FORMER GERMAN DEMOCRATIC REPUBLIC	1997
FORMER YEMEN	1997
FRANCE (INCLUDING MONACO)	1997	103487	15160	65547	20090	2690	0	1.77	6107
FRENCH GUIANA	1997	245	0	238	0	7	0	1.65	14
FRENCH POLYNESIA	1997	157	0	157	0	0	0	0.7	36
GABON	1997	967	0	501	439	27	0	0.84	280
GAMBIA	1997	59	0	59	0	0	0	0.05	0
GEORGIA	1997	1210	8	712	478	12	0	0.25	41
GERMANY	1997	245519	91676	103326	44937	4889	691	3	6146
GHANA	1997	1744	2	1510	0	231	0	0.1	58
GIBRALTAR	1997	33	0	33	0	0	0	1.17	1831
GREECE	1997	23063	9185	11733	106	2038	1	2.13	3407
GREENLAND	1997	143	0	143	0	0	0	2.57	0
GRENADA	1997	56	0	56	0	0	0	0.56	2
GUADELOUPE	1997	421	0	390	0	31	0	1.02	66
GUATEMALA	1997	2072	0	1892	6	174	0	0.2	0
GUINEA	1997	349	0	314	0	35	0	0.04	11
GUINEA BISSAU	1997	84	0	84	0	0	0	0.07	5
GUYANA	1997	437	0	437	0	0	0	0.58	13
HAITI	1997	388	0	388	0	0	0	0.05	0
HONDURAS	1997	1134	0	992	0	142	0	0.19	0
HONG KONG SPECIAL ADMINSTRATIVE REGION OF CHINA	1997	8414	3161	3650	1341	262	0	1.31	4319
HUNGARY	1997	16855	5033	5376	6064	382	0	1.64	153
ICELAND	1997	574	58	502	0	14	0	2.1	116
INDIA	1997	284685	193620	66649	12561	10880	974	0.29	560
INDONESIA	1997	75991	8021	39265	22391	3741	2572	0.38	804
IRAQ	1997	18628	0	16537	1598	231	262	0.83	358
IRELAND	1997	9968	3086	4864	1731	286	0	2.72	472
ISLAMIC REPUBLIC OF IRAN	1997	79252	1058	43627	26174	2618	5775	1.24	1071
ISRAEL	1997	17290	6382	10168	7	734	0	3.04	157
ITALY (INCLUDING SAN MARINO)	1997	117890	11727	71918	29659	4586	0	2.06	4306
JAMAICA	1997	2899	49	2770	0	80	0	1.16	0
JAPAN	1997	327728	94378	184252	36594	12504	0	2.6	9533
JORDAN	1997	3932	0	3364	126	442	0	0.86	233
KAZAKHSTAN	1997	35337	22537	8313	4397	90	0	2.28	262
KENYA	1997	2254	67	1983	0	205	0	0.08	49
KIRIBATI	1997	8	0	8	0	0	0	0.09	0
KUWAIT	1997	13461	0	8064	4856	272	268	7.32	917
KUWAITI OIL FIRES	1997
KYRGYZSTAN	1997	1495	495	457	454	89	0	0.32	38
LAO PEOPLE S DEMOCRATIC REPUBLIC	1997	196	91	95	0	11	0	0.04	0
LATVIA	1997	2301	230	1373	665	33	0	0.95	27
LEBANON	1997	4267	166	3733	0	368	0	1.18	162
LIBERIA	1997	97	0	96	0	1	0	0.04	14
LIBYAN ARAB JAMAHIRIYAH	1997	13253	4	9054	2881	343	971	2.63	168
LITHUANIA	1997	4183	215	2621	1250	97	0	1.17	80
LUXEMBOURG	1997	2159	323	1352	391	93	0	5.14	209
MACAU SPECIAL ADMINSTRATIVE REGION OF CHINA	1997	409	0	409	0	0	0	0.97	0
MACEDONIA	1997	2900	2019	813	0	68	0	1.46	17
MADAGASCAR	1997	464	9	450	0	5	0	0.03	15
MALAWI	1997	207	12	171	0	24	0	0.02	15
MALAYSIA	1997	34039	1740	19315	9673	1723	1588	1.57	139
MALDIVES	1997	100	0	100	0	0	0	0.39	0
MALI	1997	143	0	139	0	4	0	0.01	15
MALTA	1997	884	192	692	0	0	0	2.31	87
MARSHALL ISLANDS	1997	18	0	18	0	0	0	0.36	0
MARTINIQUE	1997	557	0	527	0	30	0	1.48	33
MAURITANIA	1997	818	1	805	0	11	0	0.34	16
MAURITIUS	1997	545	33	512	0	0	0	0.47	158
MEXICO	1997	98608	6812	68635	16294	3747	3120	1.04	2551
MONGOLIA	1997	2103	1780	308	0	15	0	0.91	0
MONTENEGRO	1997
MONTSERRAT	1997	13	0	13	0	0	0	1.54	1
MOROCCO	1997	8689	2256	5431	18	984	0	0.31	0
MOZAMBIQUE	1997	307	0	277	0	30	0	0.02	24
MYANMAR (FORMERLY BURMA)	1997	2045	14	1061	892	70	7	0.05	17
NAMIBIA	1997	519	8	504	0	7	0	0.3	0
NAURU	1997	38	0	38	0	0	0	3.75	4
NEPAL	1997	759	221	507	0	31	0	0.03	0
NETHERLAND ANTILLES	1997	1740	0	1740	0	0	0	9.33	1533
NETHERLANDS	1997	48617	8481	17629	22004	439	64	3.11	13146
NEW CALEDONIA	1997	498	82	402	0	14	0	2.46	21
NEW ZEALAND	1997	8471	1293	4049	2943	133	53	2.25	764
NICARAGUA	1997	855	0	804	0	51	0	0.18	0
NIGER	1997	276	93	179	0	4	0	0.03	11
NIGERIA	1997	10960	12	7694	2911	343	0	0.09	702
NIUE	1997	1	0	1	0	0	0	0.41	0
NORWAY	1997	9308	1068	5775	2006	234	225	2.11	1148
OCCUPIED PALESTINIAN TERRITORY	1997	113	5	108	0	0	0	0.04	0
OMAN	1997	4253	0	1561	2046	172	473	1.87	173
PACIFIC ISLANDS (PALAU)	1997
PAKISTAN	1997	25828	2340	13471	8793	1224	0	0.19	127
PALAU	1997	32	0	32	0	0	0	1.76	13
PANAMA	1997	1625	41	1457	32	95	0	0.58	0
PAPUA NEW GUINEA	1997	697	1	640	56	0	0	0.14	49
PARAGUAY	1997	1144	0	1052	0	92	0	0.23	28
PERU	1997	7474	345	6330	215	585	0	0.3	313
PHILIPPINES	1997	21108	3682	15425	3	1997	0	0.29	630
PLURINATIONAL STATE OF BOLIVIA	1997	2684	0	1468	731	141	344	0.34	0
POLAND	1997	95732	74739	13071	5882	2040	0	2.48	354
PORTUGAL	1997	14556	3622	9602	54	1278	0	1.44	830
QATAR	1997	9896	0	2134	7668	94	0	17.95	0
REPUBLIC OF CAMEROON	1997	877	1	792	0	84	0	0.06	44
REPUBLIC OF KOREA	1997	115401	33430	65442	8326	8203	0	2.54	8274
REPUBLIC OF MOLDOVA	1997	1936	272	701	946	17	0	0.45	20
REUNION	1997	640	0	599	0	41	0	0.93	9
ROMANIA	1997	31630	9696	10986	9955	993	0	1.41	103
RUSSIAN FEDERATION	1997	430061	125362	103983	194597	3631	2489	2.91	7303
RWANDA	1997	178	0	169	0	8	1	0.03	8
SAINT HELENA	1997	4	0	4	0	0	0	0.81	0
SAINT LUCIA	1997	85	0	85	0	0	0	0.56	2
SAMOA	1997	36	0	36	0	0	0	0.21	0
SAO TOME & PRINCIPE	1997	21	0	21	0	0	0	0.16	0
SAUDI ARABIA	1997	59129	0	34004	22511	2094	520	3.08	3733
SENEGAL	1997	890	0	761	12	116	0	0.1	227
SERBIA	1997
SEYCHELLES	1997	113	0	113	0	0	0	1.45	99
SIERRA LEONE	1997	173	0	151	0	22	0	0.04	87
SINGAPORE	1997	18882	0	17621	812	449	0	5.09	15630
SLOVAKIA	1997	11449	5299	2240	3485	426	0	2.13	30
SLOVENIA	1997	4420	1596	2176	496	151	0	2.24	15
SOLOMON ISLANDS	1997	44	0	44	0	0	0	0.12	2
SOMALIA	1997
SOUTH AFRICA	1997	101262	89186	9884	861	1332	0	2.36	2766
SPAIN	1997	72119	19006	42290	7063	3758	2	1.82	6922
SRI LANKA	1997	2047	2	1914	0	131	0	0.11	321
ST. KITTS-NEVIS	1997	28	0	28	0	0	0	0.62	0
ST. PIERRE & MIQUELON	1997	13	0	13	0	0	0	1.99	3
ST. VINCENT & THE GRENADINES	1997	37	0	37	0	0	0	0.34	0
SUDAN	1997	1478	0	1440	0	38	0	0.05	35
SURINAME	1997	584	0	576	0	8	0	1.3	0
SWAZILAND	1997	328	154	174	0	0	0	0.32	1
SWEDEN	1997	14866	2607	11504	449	306	0	1.68	1521
SWITZERLAND	1997	11339	115	9306	1433	485	0	1.58	1123
SYRIAN ARAB REPUBLIC	1997	14261	3	7323	2308	658	3970	0.93	77
TAIWAN	1997	54794	22908	26295	2664	2927	0	2.52	2328
TAJIKISTAN	1997	587	17	172	393	5	0	0.1	4
THAILAND	1997	57285	12927	31784	7526	5048	0	0.94	0
TIMOR-LESTE (FORMERLY EAST TIMOR)	1997
TOGO	1997	269	0	212	0	57	0	0.06	12
TONGA	1997	31	0	31	0	0	0	0.32	3
TRINIDAD AND TOBAGO	1997	5244	0	851	3769	89	534	4.1	174
TUNISIA	1997	4621	71	2705	1173	602	70	0.5	15
TURKEY	1997	55328	22345	22820	5210	4901	52	0.87	507
TURKMENISTAN	1997	8162	0	2324	5776	61	0	1.89	0
TURKS AND CAICOS ISLANDS	1997	3	0	3	0	0	0	0.21	0
UGANDA	1997	309	0	270	0	39	0	0.01	0
UKRAINE	1997	93045	38965	11957	41430	693	0	1.85	545
UNITED ARAB EMIRATES	1997	11357	0	-4663	14508	714	798	4.16	10070
UNITED KINGDOM	1997	151136	41429	57588	49001	1719	1399	2.58	6750
UNITED REPUBLIC OF TANZANIA	1997	786	20	682	0	84	0	0.02	69
UNITED STATES OF AMERICA	1997	1500236	558617	595928	330427	11459	3806	5.33	34392
URUGUAY	1997	1515	1	1407	0	106	0	0.46	280
USSR	1997
UZBEKISTAN	1997	27756	824	5217	21266	449	0	1.17	0
VANUATU	1997	24	0	24	0	0	0	0.14	0
VENEZUELA	1997	36532	34	15142	17922	1108	2326	1.59	757
VIET NAM	1997	12349	5875	5072	311	1091	0	0.16	0
WALLIS AND FUTUNA ISLANDS	1997
WESTERN SAHARA	1997	60	0	60	0	0	0	0.22	3
YEMEN	1997	4220	0	4052	0	168	0	0.25	161
YUGOSLAVIA (FORMER SOCIALIST FEDERAL REPUBLIC)	1997
YUGOSLAVIA (MONTENEGRO & SERBIA)	1997	13917	9331	2919	1393	273	0	1.28	81
ZAMBIA	1997	652	132	467	0	52	0	0.07	18
ZIMBABWE	1997	3929	2591	1188	0	150	0	0.32	97
Total (in Pg C or Gt C)	1997	6.44361	2.52852	2.45902	1.20585	0.209174	0.041033		0.192657
EU-15 (in Pg C or Gt C)	1997	0.885884
EU-27 w/o CY and MT (in Pg C or Gt C)	1997	1.10765

[truncated: 56 more sheets: CDIAC Nations 1998, CDIAC Nations 1999, CDIAC Nations 2000, CDIAC Nations 2001, CDIAC Nations 2002, CDIAC Nations 2003, CDIAC Nations 2004, CDIAC Nations 2005, CDIAC Nations 2006, CDIAC Nations 2007, CDIAC Nations 2008, GCP CO2 Transfer 1990-2010, GCP Global 1959-2010, WHRC LU 1850-2005, WHRC LU 1850-2010, WRI LUCF 1990-2005, IFF HANPP Trade 2000, EPA Non-CO2 1990-2020, UNFCCC CO2-eq 1990-2009, UNFCCC CO2 1990-2009 …]
